# Supplementary material for: National optimisation of accessibility to emergency obstetrical and neonatal care in Togo: a geospatial analysis
Source: PubMed Central journal article supplement — BMJ Open. 2021 Jul 30;11(7):e045891. doi: 10.1136/bmjopen-2020-045891 (PMC8327815; doi:10.1136/bmjopen-2020-045891), 2021-07-30
Supplement: bmjopen-2020-045891.draft_revisions.pdf [file bmjopen-2020-045891.draft_revisions.pdf]

# BMJ Open

BMJ Open is committed to open peer review. As part of this commitment we make the peer review history of every article we publish publicly available.

When an article is published we post the peer reviewers' comments and the authors' responses online. We also post the versions of the paper that were used during peer review. These are the versions that the peer review comments apply to.

The versions of the paper that follow are the versions that were submitted during the peer review process. They are not the versions of record or the final published versions. They should not be cited or distributed as the published version of this manuscript.

BMJ Open is an open access journal and the full, final, typeset and author-corrected version of record of the manuscript is available on our site with no access controls, subscription charges or pay-per-view fees (<http://bmjopen.bmj.com>).

If you have any questions on BMJ Open's open peer review process please email [info.bmjopen@bmj.com](mailto:info.bmjopen@bmj.com)

# BMJ Open

## National optimization of geographical accessibility to emergency obstetric and neonatal care in Togo

|                               |                                                                                                                                                                                                                                                                                                                                                                                                                                                                                                                                                                                                                  |
|-------------------------------|------------------------------------------------------------------------------------------------------------------------------------------------------------------------------------------------------------------------------------------------------------------------------------------------------------------------------------------------------------------------------------------------------------------------------------------------------------------------------------------------------------------------------------------------------------------------------------------------------------------|
| Journal:                      | <i>BMJ Open</i>                                                                                                                                                                                                                                                                                                                                                                                                                                                                                                                                                                                                  |
| Manuscript ID                 | bmjopen-2020-045891                                                                                                                                                                                                                                                                                                                                                                                                                                                                                                                                                                                              |
| Article Type:                 | Original research                                                                                                                                                                                                                                                                                                                                                                                                                                                                                                                                                                                                |
| Date Submitted by the Author: | 15-Oct-2020                                                                                                                                                                                                                                                                                                                                                                                                                                                                                                                                                                                                      |
| Complete List of Authors:     | Curtis, Andrew; University of Geneva Institute of Global Health, GeoHealth group; Universite de Geneve Institut des Sciences de l'Environnement<br>Monet, Jean-Pierre; UNFPA, Technical Division<br>Brun, Michel; UNFPA, Technical Division<br>Bindaoudou, Kerim; National Institute of Statistics and Economic and Demographic Studies<br>Daoudou, Idrissou; Ministry of Health of Togo<br>Schaaf, Marta; Independent Consultant,<br>Agbigbi, Yawo; UNFPA-Togo<br>Ray, Nicolas; University of Geneva Institute of Global Health, GeoHealth group; Universite de Geneve Institut des Sciences de l'Environnement |
| Keywords:                     | PUBLIC HEALTH, Maternal medicine < OBSTETRICS, Organisation of health services < HEALTH SERVICES ADMINISTRATION & MANAGEMENT                                                                                                                                                                                                                                                                                                                                                                                                                                                                                     |
|                               |                                                                                                                                                                                                                                                                                                                                                                                                                                                                                                                                                                                                                  |

SCHOLARONE™  
Manuscripts

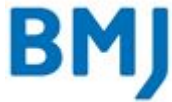

I, the Submitting Author has the right to grant and does grant on behalf of all authors of the Work (as defined in the below author licence), an exclusive licence and/or a non-exclusive licence for contributions from authors who are: i) UK Crown employees; ii) where BMJ has agreed a CC-BY licence shall apply, and/or iii) in accordance with the terms applicable for US Federal Government officers or employees acting as part of their official duties; on a worldwide, perpetual, irrevocable, royalty-free basis to BMJ Publishing Group Ltd ("BMJ") its licensees and where the relevant Journal is co-owned by BMJ to the co-owners of the Journal, to publish the Work in this journal and any other BMJ products and to exploit all rights, as set out in our [licence](#).

The Submitting Author accepts and understands that any supply made under these terms is made by BMJ to the Submitting Author unless you are acting as an employee on behalf of your employer or a postgraduate student of an affiliated institution which is paying any applicable article publishing charge ("APC") for Open Access articles. Where the Submitting Author wishes to make the Work available on an Open Access basis (and intends to pay the relevant APC), the terms of reuse of such Open Access shall be governed by a Creative Commons licence – details of these licences and which [Creative Commons](#) licence will apply to this Work are set out in our licence referred to above.

Other than as permitted in any relevant BMJ Author's Self Archiving Policies, I confirm this Work has not been accepted for publication elsewhere, is not being considered for publication elsewhere and does not duplicate material already published. I confirm all authors consent to publication of this Work and authorise the granting of this licence.

## National optimization of geographical accessibility to emergency obstetric and neonatal care in Togo

Andrew Curtis<sup>1,2</sup>, Jean-Pierre Monet<sup>3</sup>, Michel Brun<sup>3</sup>, Kérim Bindaoudou<sup>4</sup>, Idrissou Daoudou<sup>5</sup>,  
Marta Schaaf<sup>6</sup>, Yawo Agbigbi<sup>7</sup>, Nicolas Ray<sup>1,2,\*</sup>

<sup>1</sup> GeoHealth group, Institute of Global Health, Faculty of Medicine, University of Geneva, Geneva, Switzerland

<sup>2</sup> Institute for Environmental Sciences, University of Geneva, Geneva, Switzerland

<sup>3</sup> Technical division, United Nations Population Fund (UNFPA), New York, USA

<sup>4</sup> National Institute of Statistics and Economic and Demographic Studies (INSEED), Lomé, Togo

<sup>5</sup> Ministry of Health, Lomé, Togo

<sup>6</sup> Independent Consultant, Brooklyn, USA

<sup>7</sup> United Nations Population Fund (UNFPA), Lomé, Togo

Corresponding author: Dr. Nicolas Ray, [nicolas.ray@unige.ch](mailto:nicolas.ray@unige.ch), GeoHealth group, Institute of Global Health, Faculty of Medicine, Campus Biotech, Chemin des Mines 9, 1202 Geneva, Switzerland

## Abstract

**Introduction:** Improving access to emergency obstetrical and neonatal care (EmONC) is a key strategy for reducing maternal and neonatal mortality. Access is shaped by several factors, including service availability and geographic accessibility. In 2013, the Ministry of Health of Togo used service availability and other criteria to designate particular facilities as EmONC facilities, facilitating efficient allocation of limited resources. In 2018, the MoH further revised and rationalized this health facility network by applying an innovative methodology to optimize timely access to EmONC services. This study compares the geographic accessibility of the network established in 2013 and the more limited network developed in 2018.

**Methods:** We used data regarding travel modes and speeds, geographic barriers, and topographic and urban constraints, to estimate travel times to the nearest EmONC facilities. We compared the EmONC network of 109 facilities established in 2013 with the one composed of 73 facilities established in 2018, using three travel scenarios (walking and motorized, motorcycle-taxi, and walking-only).

**Results:** When walking and motorized travel is considered, the 2013 EmONC network covers 81% and 96.7% of the population at the 1-hour and 2-hour limit, respectively. These figures are slightly higher when motorcycle-taxis are considered (82.8 % and 98%), and drop down to 34.7% and 52.3% for the walking-only scenario. The 2018 prioritized EmONC network covers 78.3% (1-hour) and 95.5% (2-hour) of the population for the walking and motorized scenario. Population coverage is found to be most sensitive to uncertainties on speeds of travel on roads.

**Conclusion:** By considering geographical accessibility, our EmONC prioritization approach decreased the designated number of EmONC facilities in Togo by about 30%, while still ensuring that a high proportion of the population has timely access to these services. However, there physical access to EmONC for women not able to afford motorized transport remains inequitable.

**Keywords:** maternal health, universal health coverage, geospatial modelling, physical accessibility, health system strengthening

### Strengths and limitations of this study

- This is the first study presenting a national optimization of a network of EmONC facilities partly based on realistic physical accessibility modelling.
- Country-based experts estimated the modes and speeds of transport on the various road types and off-road landcover categories, and associated uncertainty was accounted for.
- The EmONC prioritization approach succeeded in prioritizing 73 out of the initial 109 EmONC facilities, with only a marginal drop of population coverage.
- Only the physical accessibility to nearest EmONC services was modelled, but potential financial barriers and the fact that some patients could bypass the nearest facility may also affect access to EmONC.
- Travel was modelled only for the dry season conditions, but degraded road conditions in certain parts of the countries during the wet season may affect our estimates of EmONC accessibility.

## INTRODUCTION

The Sustainable Development Goal (SDG) on health (SDG3) aims at bettering health outcomes for different at-risk groups, including pregnant women (SDG3.1.) and children under 5 years of age (SDG3.2.). One of the primary strategies for reducing maternal and neonatal mortality and morbidity is ensuring timely access to quality emergency obstetric and neonatal care (EmONC)[1]. However, access to EmONC is still a challenge in many low-income countries, especially in sub-Saharan Africa[2].

Because the physical distance to facilities has long been recognized as an important component of timely access to care[3, 4], an adequate geographic distribution of EmONC facilities is a prerequisite to minimize travel times for women in need of EmONC. WHO recommends a benchmark of no more than 2 hours of travel time to reach the nearest EmONC facility[5], as after 2 hours an obstetric hemorrhage can be fatal.

Realistically modelling and measuring spatial accessibility to health services is therefore very important for adequate planning and improvement of access to quality healthcare for pregnant women and newborns[6]. Some studies have used simple distances[7] and time[8] metrics, as well as population-to-provider ratios (PPRs)[9]. These metrics have been popular for their ease of use and minimal need for the input of spatial data layers, i.e. data that both provide locations and describe characteristics of geographic features.

However, these methods are not appropriate for modelling geographic accessibility in complex terrains where different modes of transport are potentially used for a single trip, and when patients seeking care are facing an emergency, where every minute of travel time is consequential. In such cases, approaches based on least-cost path modelling (i.e., finding the fastest route between locations based on various travel constraints) have proved useful to estimate time and routing to reach the nearest care providers, and to model catchment areas of facilities. Applying this modelling approach, the AccessMod tool[10] helps estimate geographic accessibility by taking into consideration the modes of transport, their respective speeds of travel on roads and off-road on various landcover types, and the influence of the topography and other barriers to movement. Studies assessing the accessibility of a variety of health care destinations have used AccessMod in their analyses (see e.g.[11-18]). Specific to accessibility to EmONC, Ebener and colleagues[19] have recently formalized and proposed new indicators based on least-cost path modelling.

The main objective of this study was to realistically determine and compare the overall geographic accessibility of our target population (women with obstetrical complications in need of EmONC) to two EmONC facility networks: the first one designated by the Ministry of Health

(MoH) in 2013 and the second one in 2018 through a methodology using accessibility modelling. We defined and applied various travel scenarios based on inputs from national and sub-national stakeholders, including speed and transport modes and their associated uncertainties. Besides expanding knowledge on the underlying mechanisms of geographical access to EmONC facilities in Togo, we described a robust spatially-explicit methodology for quantifying the population covered by networks of EmONC health facilities that can be replicated in other countries.

## DATA AND METHODS

### Study site and context

Togo is one of the smallest African countries in terms of landmass (approximately 56'785 km<sup>2</sup>), with a population of approximately 7.9 million in 2018[20], and it is bordered by Benin to the East, Ghana to the West and Burkina Faso to the North. More than 40% of the total population live in the Southern part of the country[21] (in the region of Maritime and in the capital city of Lomé), with 42% of this population living in urban areas[21]. The 2017 Multiple Indicator Cluster Survey (MICS 6) for Togo[22] determined that there is a strong correlation between poverty and maternal mortality and morbidity, with the probability of giving birth assisted by qualified personnel found to be highly correlated to socio-economic status (98% of women in the richest quintile are assisted at birth by skilled health personal, compared to only 52% of the poorest quintile) and to place of residence (98% of women living in urban settings have skilled birth attendance, as compared to 65% of women living in rural settings). Three quarters of maternal deaths were found to be due to direct obstetrical causes. This suggests that access to timely EmONC is essential for reducing maternal mortality in Togo.

The 2017-2022 national plan for the health sector development in Togo[23] highlights that morbidity and mortality rates for mothers and newborns are still very high, and notes that this is due to insufficient supply of obstetric and neonatal care and by barriers to service access, including financial barriers. Despite some progress over the last decades, maternal and newborn mortality are still high in Togo, respectively 396 (80% CI: 270-557) maternal deaths per 100,000 live births in 2017[23] and 25 neonatal deaths per 1,000 live births in 2018[2]. Improving access to quality EmONC services has been a priority for the government since the EmONC needs assessment of 2012. In 2013, the MoH used facility data to identify 109 priority health facilities designated to provide EmONC services, and launched a process to monitor



1  
2  
3 them on a quarterly basis to assess and address gaps in availability and quality of care. EmONC  
4 facility functionality requires enough qualified providers for 24h/7d services and the  
5 availability of key equipment, consumables, and medication for performing the key medical  
6 interventions (or signal functions) that are used to treat the direct obstetric complications that  
7 cause the vast majority of maternal deaths.  
8  
9

10  
11 While the focus on a limited number of health facilities led to some progress in the  
12 availability of services, for example the increase of the proportion of EmONC facilities  
13 applying vacuum extractions from 5% in 2014 to 47% in 2016, the MoH decided in 2018 to  
14 further focus their efforts and resource allocation by decreasing the number of priority facilities;  
15 the MoH ultimately selected 73 health facilities that should provide EmONC services in the  
16 country. This selection was guided by a methodology developed by UNFPA and formalized  
17 and described in UNFPA's EmONC Network Development Implementation Manual[24]. In  
18 brief, this methodology, based on WHO, UNFPA, and UNICEF recommendations[5], helps  
19 countries to identify a network of EmONC facilities by selecting a number of EmONC facilities  
20 that do not exceed the international norm of 5 EmONC facilities per 500,000 population, and,  
21 by prioritizing facilities that can most feasibly be supported to actually provide all the relevant  
22 EmONC signal functions 24h/7d (see Box 1) with quality care, during the next programmatic  
23 cycle of the MoH (i.e. in the next 3-4 years). The selection of health facilities is done by  
24 considering both health facility characteristics (e.g. number of deliveries, human resources,  
25 gaps in EmONC signal functions, infrastructure) and two spatially-explicit indicators[19]: the  
26 population living within 1 and/or 2-hour maximum travel time from the nearest EmONC facility  
27 (i.e. population coverage), and the quality of each referral linkage between Basic EmONC  
28 (BEmONC) health facilities and their closest Comprehensive EmONC (CEmONC) health  
29 facility. BEmONC health facilities should provide seven EmONC signal functions 24h/7d  
30 while CEmONC health facilities provide nine EmONC signal functions (see Box 1).  
31  
32  
33  
34  
35  
36  
37  
38  
39  
40  
41  
42  
43  
44  
45  
46  
47  
48  
49  
50  
51  
52  
53  
54  
55  
56  
57  
58  
59  
60

**Box 1:** Emergency obstetrical and neonatal care (EmONC) signal functions

| Services available 24h/24 and 7d/7           |                                                      |
|----------------------------------------------|------------------------------------------------------|
| <b>Basic EmONC (BEmONC) signal functions</b> | <b>Comprehensive EmONC (CEmONC) signal functions</b> |
| 1) Administer parenteral antibiotics         | BEmONC signal functions (1-7)                        |
| 2) Administer uterotonic drugs               | +                                                    |
| 3) Administer parenteral anticonvulsants     | 8) Perform blood transfusion                         |
| 4) Perform manual removal of the placenta,   | 9) Perform Caesarean section.                        |
| 5) Remove retained products                  |                                                      |
| 6) Perform assisted vaginal delivery         |                                                      |
| 7) Perform basic neonatal resuscitation.     |                                                      |

**Accessibility & population coverage modelling**

We used AccessMod, a WHO stand-alone and open-source geospatial tool[10, 25], to analyze the physical accessibility to, and the population coverage of, the national networks of EmONC health facilities in Togo in 2013 and 2018. AccessMod is based on a least-cost path algorithm that computes the fastest route between any location and the nearest health service (for details, see [10]). It can consider several sequential modes of travel (e.g. walking to a road, where one catches a motorcycle-taxi), several types of barriers to movement, health facility capacity, and population, when determining catchment areas. Moreover, AccessMod considers the direction of movement by applying an anisotropic analysis, i.e. considering the slope of the terrain to accurately model bicycling and walking speeds. Contrary to many accessibility modelling approaches that are based on a perfectly routable road data set (such as Nichols et al[26]), AccessMod can consider off-road travel in addition to road travel. On- and off-road travel speeds and modes of transport are user-defined in a travel scenario that assigns these travel constraints to each land cover and/or road category found in the input data.

For the movements of our target population, we defined three distinct travel scenarios from home to the nearest EmONC facility: 1) a walking & motorized scenario, 2) a motorcycle-taxi scenario, and 3) a walking-only scenario. The first scenario assumes that patients walk to the nearest road and then use a motorized mode of transportation (private or public), immediately available, to continue their journey. In the second scenario, patients use motorcycle-taxis to travel on- and off-road, with different speeds depending on the land cover.

1  
2  
3 Finally, the third scenario assumes patients are walking or being carried (e.g. on stretchers,  
4 carts) at walking speed (or lower).  
5

6 The choice for these three scenarios and their associated modes and speeds of travel  
7 were decided through an iterative process of two workshops in Togo over the period 2016-  
8 2018. A first 3-day workshop took place in May 2016 to strengthen national capacity to analyze  
9 the geographic accessibility of health facilities in Togo by using AccessMod. The thirty  
10 Togolese participants were technical experts from the MoH; the national Togolese Institute for  
11 Statistics, Economic and Demographic studies (INSEED); NGOs and UN agencies; and they  
12 discussed and agreed on the specifics of how women with obstetrical emergency typically travel  
13 when they need to reach an EmONC facility in Togo. Average speeds of travel on all road  
14 categories were estimated by consensus, with travel scenario 1 deemed to be the most frequent.  
15 During a second workshop in May 2018, health stakeholders from each of the 6 regions of Togo  
16 gathered to define which health facilities should comprise their EmONC facility regional  
17 network, using the prioritization methodology described above to select a number of EmONC  
18 facilities per region not exceeding the international norm of 5 EmONC facilities per 500,000  
19 population. These participants further refined the travel scenarios, and agreed that bicycles and  
20 public transport were rarely used, with the exception of a public bus system operating in greater  
21 Lomé [27]. The final travel speeds chosen for the three scenarios are found in Supplement 1.  
22  
23  
24  
25  
26  
27  
28  
29  
30  
31  
32  
33

34 Road speeds in urban areas were adjusted in order to simulate slower motorized travel  
35 occurring in intra-urban contexts due to various factors such as stoplights, traffic, pedestrians,  
36 and other hazards. Specifically, for scenario 1, travel speeds on asphalted roads were lowered  
37 from 80 km/h in rural areas to 30 km/h in urban areas, on urban secondary roads the speeds  
38 were lowered from 40 km/h to 20 km/h, and on urban tracks the speeds were lowered from  
39 15km/h to 10 km/h. For scenario 2, travel speeds on asphalted roads were lowered from 40  
40 km/h to 30 km/h, urban secondary road speeds were lowered from 20 km/h to 15 km/h and  
41 track travel speeds in urban areas were lowered from 15 km/h to 10 km/h. The speed corrections  
42 were applied on all road segments falling within the extent of the urban areas informed by the  
43 Global Rural Urban Mapping Project[28] (see Figure 1C).  
44  
45  
46  
47  
48  
49  
50  
51  
52

### 53 **Uncertainty analysis**

54 To account for uncertainty in travel speeds, we additionally ran each consensus travel  
55 scenario with 20% slower or 20% faster speeds compared to the consensus scenario, following  
56 the methodology developed in Ouma et al.[16] and in Stewart et al.[29]. This translated to lower  
57 and upper uncertainty bounds on the reported output statistics. To further disentangle the effects  
58  
59  
60

1  
2  
3 of uncertainties on the speeds on roads and off roads, we ran scenario 1 by keeping on-road  
4 speeds constant (at consensus values) and varying off-road speeds by the plus or minus 20%.  
5 Conversely, we ran this scenario keeping off-road speeds constant and varying on-road speeds.  
6 Finally, to test the model's sensitivity to the consideration of topography, we also ran each  
7 consensus travel speed scenario without considering slope correction (i.e., isotropic mode).  
8  
9

10  
11 Two uncertainty indicators were produced: (1) lower and upper uncertainty bounds on  
12 the variation in percentage (per region and for the whole country) of the coverage of population  
13 living less than one and two hours away from the closest EmONC facility, and (2) a series of  
14 spatially-explicit uncertainty maps showing the differences (by subtraction) between the lower  
15 and upper bound travel time maps.  
16  
17  
18  
19  
20  
21  
22  
23

### 24 **Input geospatial data**

25  
26 Various datasets were assembled and prepared to run the geospatial analyses in  
27 AccessMod (details of the preparation steps are found in Supplement 2). We obtained the names  
28 and geographic coordinates of the 109 EmONC facilities composing the initial national network  
29 of EmONC health facilities in 2013 from INSEED (Figure 1A). We further verified these names  
30 and coordinates with the help of the MoH. For the EmONC health facilities network of 2018,  
31 the 73 final designated set of facilities was obtained through the MoH[30].  
32  
33  
34  
35

36 We used the road network created by the *Direction de la Cartographie nationale et du*  
37 *cadastre* of Togo, classified in three hierarchical categories: asphalted roads, secondary roads,  
38 and tracks (Figure 1B). We considered barriers to terrestrial movements composed of quarries  
39 and bodies of water, such as rivers, lakes and dammed areas. The barriers file was created by  
40 the Togolese Ministry of Agriculture, Livestock and Hydraulics (Figure 1A).  
41  
42  
43  
44

45 Administrative boundaries at the prefectural, regional and national levels were created  
46 and made available by INSEED using data collected during the 2010 general census (see Figure  
47 1C). These data sets were used to determine the percentage of population coverage for each  
48 administrative unit.  
49  
50

51 We used the Digital Elevation Model (DEM) of Togo from NASA' Shuttle Radar  
52 Topography Mission[31] (Figure 1D). Slopes were derived from the DEM directly in  
53 AccessMod. Land cover information was provided by INSEED, with a land cover data set  
54 composed of twelve categories (Figure 1E).  
55  
56  
57  
58  
59  
60

1  
2  
3 Finally, we used the population density data set from the Worldpop project[32]  
4 (Worldpop, 2013) (Figure 1F), with UN-adjusted population count from 2013 and 2018. We  
5 assumed that the target population of women with obstetrical complications in need of EmONC  
6 is uniformly distributed across the overall population.  
7  
8  
9

## 10 11 12 **Patients and the public involvement**

13  
14 There was no patient or public involvement in this study. Health facility names and  
15 geographic coordinates, as well as administrative boundaries, were shared by INSEED. The  
16 road network was shared by the *Direction de la Cartographie nationale et du cadastre* of  
17 Togo. All other geospatial data were publicly available.  
18  
19  
20  
21  
22  
23

## 24 25 **RESULTS**

26 The accessibility maps for the walking and motorized scenario, and the Motorcycle-taxi  
27 scenario, and for the two time periods, are shown in Figure 2, with the respective maps for the  
28 walking-only scenario in Supplement 3. In 2013, physical access was highest under scenario 2  
29 (motorcycle-taxi scenario), with 82.8% of the total population less than one hour away from  
30 the nearest EmONC health facility, and 98% less than two hours away from the nearest EmONC  
31 health facility. For scenario 1 (walking and motorized scenario), these figures are 81% at the 1-  
32 hour travel time limit and 96.7% at the 2-hour limit respectively. Using the 2018 network of 73  
33 facilities, the results using the motorcycle-taxi scenario are 79.2% at the 1-hour travel time limit  
34 and of 96% at the 2-hour limit. With the walking & motorized scenario, the corresponding  
35 results are 78.3% at the 1-hour limit and 95.5% at the 2-hour limit. Despite a reduction of the  
36 number of EmONC health facilities by one third from 2013 to 2018, the population able to  
37 physically access the closest EmONC health facility within one or two hours is similar – with  
38 a difference of less than 4 percentage points in these two travel scenarios.  
39  
40  
41  
42  
43  
44  
45  
46  
47  
48

49 For both time periods, access in terms of population coverage at national scale is only  
50 marginally higher for the motorcycle-taxi travel scenario, even though this translates to a much  
51 larger extent of the surface under the 2-hour maximum travel time limit (green areas in Figure  
52 2). This is explained by the fact that many areas where access is very low in scenario 1 are fairly  
53 unpopulated. We also see that accessibility is highly dependent on roads in scenario 1. This is  
54 the case for instance in parts of the Atacora mountains (large red areas in the central-western  
55 part of the country in Figure 2A), a region with a very low population density and no roads  
56  
57  
58  
59  
60

(according to our data). With scenario 2, travel is less dependent on roads than in scenario 1, but access tends nevertheless to be higher around the road network, even though travel speeds on roads are lower for motorcycle-taxis than for regular motorized transport. The results for the 2018 network at regional level are given in Table 1, and at prefectural level in Supplement 2.

Table 1: Percentage of population living less than one- or two-hour travel time to the nearest EmONC facility, in 2018, per region and for the country, with uncertainty intervals within brackets, and for the walking & motorized and the motorcycle-taxi scenarios.

| Region          | Walking & Motorized Scenario |                           | Motorcycle-taxi Scenario  |                         |
|-----------------|------------------------------|---------------------------|---------------------------|-------------------------|
|                 | <1-hour                      | <2-hour                   | <1-hour                   | <2-hour                 |
| Plateaux        | 55.4 [44.4 - 65.1]           | 89.8 [80.7 - 95.2]        | 58.7 [49.2 - 66.3]        | 88.4 [78.5 - 94.6]      |
| Kara            | 62.7 [52.3 - 71]             | 90.2 [82.8 - 94.1]        | 65.2 [56.7 - 72]          | 92.8 [84 - 97.7]        |
| Maritime        | 94.4 [90.1 - 96.7]           | 99.4 [98.6 - 99.7]        | 96.9 [93.7 - 98.5]        | 99.9 [99.7 - 100]       |
| Centrale        | 65.2 [53 - 74.7]             | 91.7 [86.6 - 93.9]        | 66.5 [56.1 - 75.7]        | 96.2 [90 - 98.5]        |
| Savanes         | 80.7 [68.9 - 87.9]           | 98.9 [96 - 99.6]          | 72.5 [58.9 - 81.8]        | 97.9 [93.3 - 99.9]      |
| Lomé<br>Commune | 100 [100 - 100]              | 100 [100 - 100]           | 100 [100 - 100]           | 100 [100 - 100]         |
| <b>Country</b>  | <b>78.3 [70.5 - 84]</b>      | <b>95.5 [91.6 - 97.5]</b> | <b>79.2 [72.2 - 84.3]</b> | <b>96 [91.6 - 98.4]</b> |

The region of Lomé Commune has 100% population coverage for both time thresholds and both motorized scenarios, which is due to the combined effect of a very densely populated region of only 90 km<sup>2</sup> with 11 EmONC facilities in 2018, and a good road network that permits the Lomé population to access the closest EmONC in less than 1 hour travel time. In contrast, the rural region of Plateaux presents much more heterogeneous results, with large uncertainty intervals. The result at prefectural level are available in Supplement 4.

We illustrate in Figure 3 the uncertainty in travel time for the walking & motorized scenario on the 2018 facility dataset, separated for the effects of speed uncertainty on roads and landcover. In these maps, pixel values indicate the extent of the uncertainty of travel time to the nearest EmONC facility, obtained by subtracting the travel time grid resulting from the "- 20%" travel speeds scenario by the "+ 20%" travel speeds scenario. The maps show a spatially heterogeneous distribution of the uncertainties, especially in the case of the road speed uncertainty map with widespread uncertainties in all areas of the country, but with relatively low uncertainties along the asphalted road network. Similar maps for the uncertainty linked to the DEM are found in Supplement 5.

The landcover and road uncertainty maps show that uncertainty is strongest in areas with very little population density (see Figure 1F). The total uncertainty map, combining

1  
2  
3 uncertainty from roads and landcover, further highlights the fact that uncertainty is quite low  
4 on roads close to facilities and increases in more rural areas.

5  
6 Population coverage for the walking-only scenario is found in Supplement 5. They show  
7 the expected drop in national population coverage to 33.4% within 1-hour walking, and 50.8%  
8 within 2-hour walking. Large differences in coverage are found between regions.  
9  
10  
11  
12

## 13 **DISCUSSION**

14  
15 The accessibility maps that were produced according to our three travel models illustrate  
16 the differences in accessibility in different parts of the country. This can help identify areas in  
17 the country where geographic accessibility to EmONC facilities is most difficult. These areas  
18 could be targeted for remedial efforts, such as mobile outreach, posting community health  
19 workers, the creation of maternity waiting homes in the EmONC health facilities of the region,  
20 or planning improvement of the road infrastructure.  
21  
22  
23  
24  
25

26 The three alternative models used to obtain these maps reflect different socio-economic  
27 segments of the population. If patients can afford to take a motorized vehicle after having  
28 reached the closest road or use a taxi-moto from their home, then more than 78% of the  
29 population can reach the closest EmONC facility (as per the 2018 designation) in less than 1  
30 hour. When considering 2-hour maximum travel time, this percentage is much higher, with 95%  
31 of the population able to reach the nearest facility within the time limit. For women obliged to  
32 walk or be carried by non-motorized means, accessibility to EmONC within one hour  
33 drastically decreases to about 33% of the population, and to 51% within the 2-hour threshold  
34 travel time limit. Thus, nearly half of the target population has low access to EmONC if they  
35 cannot afford to travel by motorized vehicle or motorcycle-taxi.  
36  
37  
38  
39  
40  
41  
42

43 As anticipated, access to EmONC is greater for urban populations, even with travel  
44 speeds that are substantially decreased in urban areas. The relatively higher density of EmONC  
45 facilities within urban areas compared to rural areas, and the much denser urban road network  
46 explain this.  
47  
48  
49

50 Though the 2018 prioritized EmONC network included 36 fewer facilities than the 2013  
51 network, the 2018 network still achieves good overall geographic accessibility. It only drops  
52 marginally in terms of population coverage (between 1 and 3.6 percentage points depending on  
53 the scenario) when compared to the initial network of 109 designated EmONC facilities in  
54 2013. However, from a planning perspective, prioritizing 73, rather than 109 facilities for  
55 EmONC functionality is a more feasible, achievable goal over the short term, i.e. the next  
56 programmatic cycle. The number of prioritized EmONC facilities is lower than the international  
57  
58  
59  
60

1  
2  
3 norm that targets around 80 functional EmONC facilities for the 2018 population of Togo.  
4 However, the decision of the MoH to target this prioritized network was commensurate with  
5 available resources and the modelling results showing that this network can nevertheless ensure  
6 timely access to a large proportion of the population in case of obstetrical complications.  
7  
8

9  
10 Our uncertainty analysis has shown that population coverage estimates are also most  
11 sensitive to uncertainties on the speeds on roads, as compared to the speeds off roads. This  
12 highlights the need for great caution when choosing travel speeds. A good representativeness  
13 of local experts, both in terms of knowledge about the specific travel behaviors of the target  
14 population and in terms of possible regional specificities for travel is vitally important. Other  
15 sources of information on effective travel speeds (e.g. using speed tracker onboard vehicles or  
16 mobile phones) could be very useful if available in the future. Furthermore, spatially displaying  
17 the uncertainty regarding travel times highlights the regions where this uncertainty is the  
18 highest, and that could be given high priority for future improvements of model parametrization  
19 (e.g. ensuring that all roads are well captured, or incorporating possible region-specific  
20 alternative means of transport).  
21  
22  
23  
24  
25  
26  
27  
28  
29

### 30 **Limitations**

31  
32 Although our study has produced the first high-resolution model of geographic  
33 accessibility to EmONC facilities in Togo, several limitations should be noted. First, our models  
34 only consider physical accessibility of the national network of EmONC health facilities.  
35 Although the three alternative transport models captured potential financial barriers linked to  
36 transport, we have not considered in this study other possible financial accessibility issues such  
37 as health care related expenditures. Acceptability (i.e. "the match between how responsive  
38 health service providers are to the social and cultural expectations of individual users and  
39 communities", see Peters et al.[33]) was also not considered. Immediate availability of  
40 motorized transport was also assumed in our models, which could over-estimate accessibility  
41 in cases where delays for findings transport are significant. Variable quality of interpersonal  
42 and clinical care in facilities can also affect which facility patients chose; they may not chose  
43 the closest facility in terms of travel time[34], possibly bypassing BEmONC health facilities in  
44 certain cases. We also assumed no delay in the decision to seek care. Clearly, further research  
45 on how to incorporate these other facets of accessibility could improve our models and our  
46 understanding of the spatial variability of effective access to EmONC.  
47  
48  
49  
50  
51  
52  
53  
54  
55  
56  
57

58 Second, although we decided to model travel during the dry season conditions, we could  
59 not capture degraded road conditions in certain parts of the countries during the wet season, and  
60



1  
2  
3 these are known to heavily affect travel time. A more balanced view of regional accessibility to  
4 EmONC could be achieved by factoring in these seasonal specificities.  
5

6 Third, our analyses were built on a uniform uncertainty range ( $\pm 20\%$ ) on all roads and  
7 landcover categories. This could be improved by applying parameter-specific uncertainty  
8 ranges, notably on the different road types. This could be captured by a dedicated workshop,  
9 with experts representing specific regions providing more realistic uncertainty ranges on  
10 motorized and walking speeds, possibly complemented by field observations or facility-based  
11 surveys. Lowering uncertainties on the travel scenario, and therefore on population coverage  
12 estimates, would improve decision making for prioritized resource allocation.  
13  
14  
15  
16  
17  
18

19 Finally, we analyze the coverage to the closest designated EmONC health facilities,  
20 which includes both functioning and non-functioning EmONC health facilities. Non-  
21 functionality is here defined as when at least one EmONC signal function has not been  
22 performed in the previous 3 months. As the aim for faster maternal mortality reduction is a  
23 national network of functional EmONC health facilities, quarterly monitoring of the national  
24 network of EmONC health facilities in Togo started in 2015, included in 2020 in the health  
25 management information system (DHIS2), providing up-to-date information on the  
26 functionality of EmONC health facilities. Applying the same modeling approach described here  
27 to only functioning EmONC health facilities would provide up-to-date population coverage  
28 indicators at national and subnational level that can inform decision makers regarding the  
29 remaining gaps in order to optimize resource allocation. These results will be described in an  
30 upcoming dedicated publication.  
31  
32  
33  
34  
35  
36  
37  
38  
39  
40

## 41 CONCLUSION

42 The physical accessibility mapping of the national network of EmONC health facilities  
43 in Togo proved to be very useful in understanding the potential of the revised network to  
44 provide quality EmONC services to a large proportion of the population, while pointing to those  
45 areas with less accessibility. Using realistic modelling based on travel times, the accessibility  
46 analyses provided key information to the 2018 EmONC prioritization exercise, which aimed at  
47 finding a balance between designating a smaller number of facilities as EmONC to channel  
48 needed resources to these priority sites for improving quality of care, and ensuring good  
49 coverage of the population within 1 hour of travel time to the closest designated EmONC health  
50 facility.  
51  
52  
53  
54  
55  
56  
57

58 The application of this methodology in Togo can be replicated in other countries thanks  
59 to the current good availability of key high-resolution geospatial data sets. This is of particular  
60

1  
2  
3 importance where mapping of physical accessibility is a crucial component for bettering health  
4 outcomes for women and newborns.  
5  
6  
7  
8  
9

## 10 **ACKNOWLEDGMENTS**

11 We thank the Ministry of Health (*Ministère de la santé et de la protection sociale*) of  
12 Togo for their engagement in the implementation of the EmONC facility network in Togo,  
13 INSEED for help in data preparation, and UNFPA-Togo and UNFPA Maternal Health  
14 Thematic Fund for organizing the workshops. The authors express their gratitude to all  
15 workshop attendees, whose active participation contributed to informing the accessibility  
16 models. The Averting Maternal Death and Disability (AMDD) Program at the Columbia  
17 University Mailman School of Public Health provided technical support; Marta Schaaf worked  
18 at AMDD at the time this work was undertaken.  
19  
20  
21  
22  
23  
24  
25  
26

## 27 **DECLARATION OF COMPETING INTEREST**

28 The authors declare that they have no known competing financial interests or personal  
29 relationships that could have appeared to influence the work reported in this paper.  
30  
31  
32  
33

## 34 **DATA SHARING STATEMENT**

35 Data available upon reasonable request.  
36  
37  
38

## 39 **AUTHOR CONTRIBUTION**

40 **Andrew Curtis:** conceptualization, methodology, formal analysis, writing, editing,  
41 visualization, validation. **Jean-Pierre Monet:** methodology, writing, editing, validation.  
42  
43 **Michel Brun:** methodology, writing, editing, validation, supervision. **Kérim Bindaoudou:**  
44 data sharing, editing, validation. **Idrissou Daoudou:** data sharing, editing, validation. **Marta**  
45 **Schaaf:** methodology, writing, editing, validation. **Yawo Agbigbi:** data sharing, editing,  
46 validation. **Nicolas Ray:** conceptualization, methodology, writing, editing, validation,  
47 supervision.  
48  
49  
50  
51  
52  
53  
54  
55  
56  
57  
58  
59  
60

## References

1. Human Reproduction Program, World Health Organization. Strategies toward ending preventable maternal mortality (EPMM). Geneva, Switzerland; 2015. [accessed 08.10.2020]  
[https://apps.who.int/iris/bitstream/handle/10665/153544/9789241508483\\_eng.pdf;jsessionid=AB036F2DFE7A4ABBB00BE525D91915BD?sequence=1](https://apps.who.int/iris/bitstream/handle/10665/153544/9789241508483_eng.pdf;jsessionid=AB036F2DFE7A4ABBB00BE525D91915BD?sequence=1)
2. UNFPA. The Maternal and Newborn Health Thematic Fund Annual Report 2018 - Fund Annual Report 2018. 2019. [accessed 08.10.2020]  
[https://www.unfpa.org/sites/default/files/pub-pdf/013\\_MHTF\\_Annual\\_report\\_15-online.pdf](https://www.unfpa.org/sites/default/files/pub-pdf/013_MHTF_Annual_report_15-online.pdf)
3. Gabrysch S, Campbell OMR. Still too far to walk: Literature review of the determinants of delivery service use. *BMC Pregnancy Childbirth*. 2009;9:18. doi: 10.1186/1471-2393-9-34
4. Kyei-Nimakoh M, Carolan-Olah M, McCann TV. Access barriers to obstetric care at health facilities in sub-Saharan Africa-a systematic review. *Syst Rev*. 2017;6:16. doi: 10.1186/s13643-017-0503-x
5. World Health Organization, United Nations Population Fund, Mailman School of Public Health, et al. Monitoring emergency obstetric care : a handbook. Geneva: World Health Organization; 2009.
6. Ebener S, Guerra-Arias M, Campbell J, et al. The geography of maternal and newborn health: the state of the art. *International Journal of Health Geographics*. 2015;14:10. doi: 10.1186/s12942-015-0012-x
7. Noor AM, Gikandi PW, Hay SI, et al. Creating spatially defined databases for equitable health service planning in low-income countries: the example of Kenya. *Acta Trop*. 2004;91(3):239-251. doi: 10.1016/j.actatropica.2004.05.003
8. Macharia PM, Ouma PO, Gogo EG, et al. Spatial accessibility to basic public health services in South Sudan. *Geospatial Health*. 2017;12(1):106-113. doi: 10.4081/gh.2017.510
9. Donohoe J, Marshall V, Tan X, et al. Evaluating and comparing methods for measuring spatial access to mammography centers in Appalachia. *Health Serv Outcomes Res Methodol*. 2016;16(1-2):22-40. doi: 10.1007/s10742-016-0143-y
10. Ray N, Ebener S. AccessMod 3.0: computing geographic coverage and accessibility to health care services using anisotropic movement of patients. *International Journal of Health Geographics*. 2008;7:17. doi: 10.1186/1476-072x-7-63
11. Alegana VA, Wright JA, Pentrina U, et al. Spatial modelling of healthcare utilisation for treatment of fever in Namibia. *International Journal of Health Geographics*. 2012;11:13. doi: 10.1186/1476-072x-11-6
12. Aoun N, Matsuda H, Sekiyama M. Geographical accessibility to healthcare and malnutrition in Rwanda. *Soc Sci Med*. 2015;130:135-145. doi: 10.1016/j.socscimed.2015.02.004
13. Costa C, Santana P, Almendra R, et al. And when there is no information? The case of São tomé and Príncipe. International Conference on Sustainability Measurement and Modeling; 2009; Terrassa, Spain. [accessed 08.10.2020]  
[https://www.researchgate.net/publication/270507560\\_And\\_when\\_there\\_is\\_no\\_information\\_The\\_case\\_of\\_Sao\\_tome\\_and\\_Principe](https://www.researchgate.net/publication/270507560_And_when_there_is_no_information_The_case_of_Sao_tome_and_Principe)
14. Fisher RP, Myers BA. Free and simple GIS as appropriate for health mapping in a low resource setting: a case study in eastern Indonesia. *International Journal of Health Geographics*. 2011;10:11. doi: 10.1186/1476-072x-10-15

15. Munoz UH, Kallestal C. Geographical accessibility and spatial coverage modeling of the primary health care network in the Western Province of Rwanda. *International Journal of Health Geographics*. 2012;11:11. doi: 10.1186/1476-072x-11-40
16. Ouma PO, Maina J, Thurairana PN, et al. Access to emergency hospital care provided by the public sector in sub-Saharan Africa in 2015: a geocoded inventory and spatial analysis. *Lancet Glob Health*. 2018;6(3):E342-E350. doi: 10.1016/s2214-109x(17)30488-6
17. Juran S, Broer PN, Klug SJ, et al. Geospatial mapping of access to timely essential surgery in sub-Saharan Africa. *BMJ Glob Health*. 2018;3(4):10. doi: 10.1136/bmjgh-2018-000875
18. Schmitz MM, Serbanescu F, Kamara V, et al. Did Saving Mothers, Giving Life Expand Timely Access to Lifesaving Care in Uganda? A Spatial District-Level Analysis of Travel Time to Emergency Obstetric and Newborn Care. *Glob Health*. 2019;7:S151-S167. doi: 10.9745/ghsp-d-18-00366
19. Ebener S, Stenberg K, Brun M, et al. Proposing standardised geographical indicators of physical access to emergency obstetric and newborn care in low-income and middle-income countries. *BMJ Glob Health*. 2019;4:11. doi: 10.1136/bmjgh-2018-000778
20. the World Bank. Togo - Data [Internet]. [accessed 08.07.2020]. Available from: <https://data.worldbank.org/country/TG>.
21. Central Intelligence Agency. Africa - Togo - The World Factbook - Central Intelligence Agency [Internet]. [accessed 09.07.2020]. Available from: <https://www.cia.gov/library/publications/the-world-factbook/geos/to.html>.
22. INSEED. MICS 6 Togo. Lomé, Togo; 2017. [accessed 08.10.2020] <https://washdata.org/report/togo-2017-mics-report-v2>
23. Ministère de la Santé et de l'Hygiène publique. Plan National de Développement 2017-2022. Lomé, Togo; 2017. [accessed 08.10.2020] <http://extwprlegs1.fao.org/docs/pdf/Tog184007.pdf>
24. Brun M, Monet, JP., Agbigbi, Y., Lysias, J., Moreira, I., Schaaf, M., Ray, N. Implementation manual for developing a national network of maternity units – Improving Emergency Obstetric and Newborn Care (EmONC). New York; 2020. Available from: <https://www.unfpa.org/publications/implementation-manual-developing-national-network-maternity-units> [accessed 08.10.2020]
25. Ray N, Ebener S MF. AccessMod 5 user manual - User manual (English) [Internet]. Geneva, Switzerland: University of Geneva; [accessed 08.10.2020]. Available from: <https://doc-accessmod.unepgrid.ch/display/EN/>.
26. Nichols BE, Girdwood SJ, Crompton T, et al. Impact of a borderless sample transport network for scaling up viral load monitoring: results of a geospatial optimization model for Zambia. *J Int AIDS Soc*. 2018;21(12):9. doi: 10.1002/jia2.25206
27. Département des transports du développement urbain et des TIC. Le secteur du transport au Togo - Bref aperçu. Groupe de la Banque Africaine de Développement; 2014 [accessed 08.10.2020] [https://www.afdb.org/fileadmin/uploads/afdb/Documents/Publications/AfDB\\_-\\_Togo\\_-\\_Note\\_sur\\_le\\_secteur\\_du\\_transport.pdf](https://www.afdb.org/fileadmin/uploads/afdb/Documents/Publications/AfDB_-_Togo_-_Note_sur_le_secteur_du_transport.pdf)
28. Center for International Earth Science Information Network - CIESIN - Columbia University, International Food Policy Research Institute - IFPRI, The World Bank, et al. Global Rural-Urban Mapping Project, Version 1 (GRUMPv1): Urban Extent Polygons, Revision 01 [Internet]. NASA Socioeconomic Data and Applications Center (SEDAC). 2017 [accessed 09.07.2020]. Available from: <https://doi.org/10.7927/H4Z31WKF>.

- 1  
2  
3  
4  
5  
6  
7  
8  
9  
10  
11  
12  
13  
14  
15  
16  
17  
18  
19  
20  
21  
22  
23  
24  
25  
26  
27  
28  
29  
30  
31  
32  
33  
34  
35  
36  
37  
38  
39  
40  
41  
42  
43  
44  
45  
46  
47  
48  
49  
50  
51  
52  
53  
54  
55  
56  
57  
58  
59  
60
29. Stewart BT, Tansley G, Gyedu A, et al. Mapping Population-Level Spatial Access to Essential Surgical Care in Ghana Using Availability of Bellwether Procedures. *Jama Surgery*. 2016;151(8). doi: 10.1001/jamasurg.2016.1239
  30. Brun M, Agbigbi Y, Bindaoudou K, et al. Priorisation et cartes des soins obstétricaux et néonataux d'urgence au Togo. Lomé, Togo; 2020. [accessed]
  31. Jarvis A, Reuter H, Nelson A, et al. Hole-filled SRTM for the globe version 3, from the CGIAR-CSI SRTM 90m database [Internet]. 2008 [accessed 08.10.2020]. Available from: <http://srtm.csi.cgiar.org>.
  32. Worldpop, CIESIN. The spatial distribution of population with country total adjusted to match the corresponding UNPD estimate - Togo [Internet]. 2013 [accessed 08.10.2020]. Available from: [ftp://ftp.worldpop.org.uk/GIS/Population/Global\\_2000\\_2020/2019/TGO/tgo\\_ppp\\_2019\\_UNadj.tif](ftp://ftp.worldpop.org.uk/GIS/Population/Global_2000_2020/2019/TGO/tgo_ppp_2019_UNadj.tif).
  33. Peters DH, Garg A, Bloom G, et al. Poverty and access to health care in developing countries. *AnnNY AcadSci*. 2008;1136:161-171. doi: 10.1196/annals.1425.011
  34. Kruk ME, Gage AD, Arsenault C, et al. High-quality health systems in the Sustainable Development Goals era: time for a revolution. *Lancet Glob Health*. 2018;6(11):E1196-E1252. doi: 10.1016/s2214-109x(18)30386-3

### Figure legends:

**Figure 1** - Vector and raster data sets used. (A) Barriers to movement (rivers, waterbodies, lakes); (B) Road network; (C) Digital Elevation Model (DEM); (D) 2013 Population density raster; (E) 2018 Population density raster; (F) Landcover raster; (G) 2013 EmONC facilities; (H) 2018 EmONC facilities; (I) Administrative boundaries (prefectures, regions and GRUMP urban extents) with region names.

**Figure 2** - Maps of the travel time to the nearest EmONC facility using either the walking & motorized travel scenario or the motorcycle-taxi travel scenario, for both time periods (2013 and 2018).

**Figure 3** - Uncertainty maps of the travel times to the nearest facility for the walking & motorized scenario on the 2018 EmONC facility network using (A) Road uncertainty, (B) Landcover uncertainty, and (C) Total uncertainty.

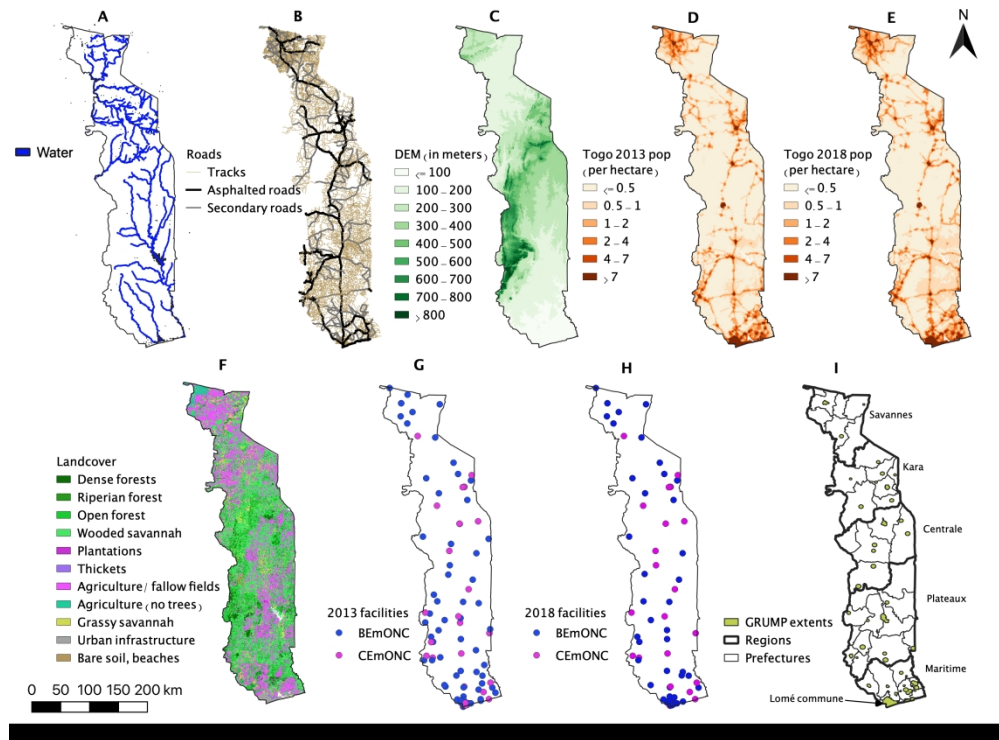

Figure 1 - Vector and raster data sets used. (A) Barriers to movement (rivers, waterbodies, lakes); (B) Road network; (C) Digital Elevation Model (DEM); (D) 2013 Population density raster; (E) 2018 Population density raster; (F) Landcover raster; (G) 2013 EmONC facilities; (H) 2018 EmONC facilities; (I) Administrative boundaries (prefectures, regions and GRUMP urban extents) with region names.

1  
2  
3  
4  
5  
6  
7  
8  
9  
10  
11  
12  
13  
14  
15  
16  
17  
18  
19  
20  
21  
22  
23  
24  
25  
26  
27  
28  
29  
30  
31  
32  
33  
34  
35  
36  
37  
38  
39  
40  
41  
42  
43  
44  
45  
46  
47  
48  
49  
50  
51  
52  
53  
54  
55  
56  
57  
58  
59  
60

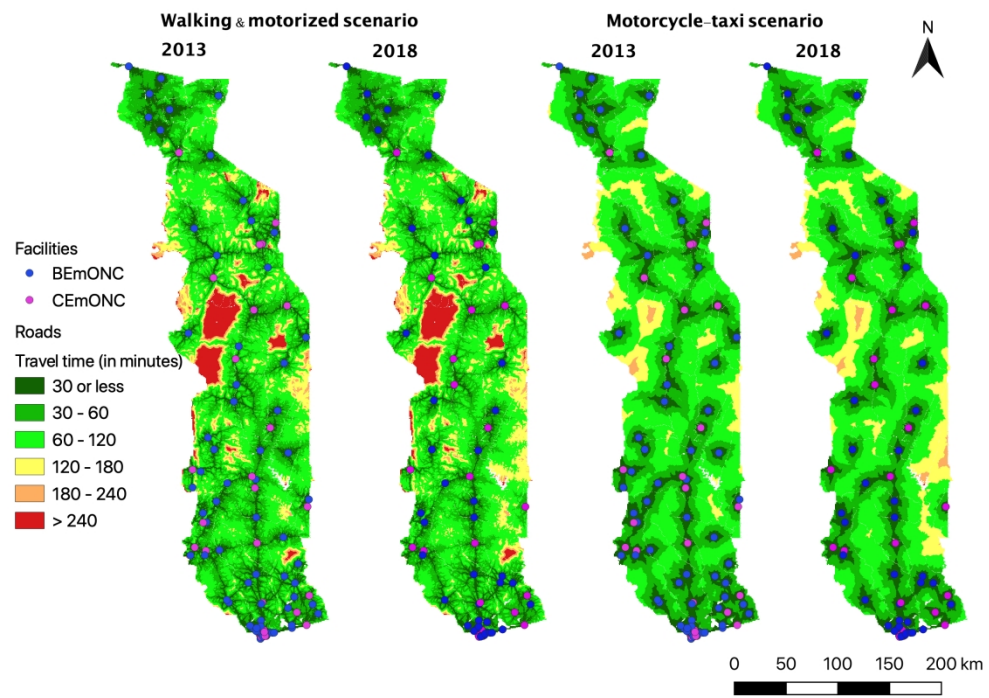

Figure 2 - Maps of the travel time to the nearest EmONC facility using either the walking & motorized travel scenario or the motorcycle-taxi travel scenario, for both time periods (2013 and 2018).

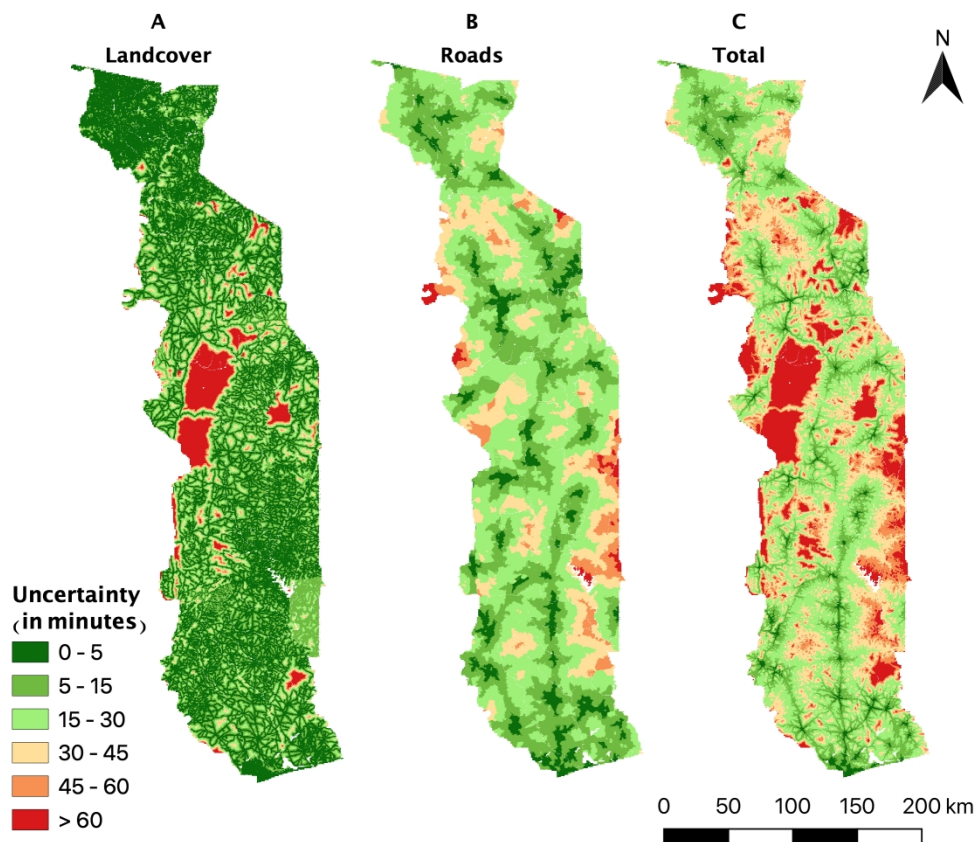

Figure 3 - Uncertainty maps of the travel times to the nearest facility for the walking & motorized scenario on the 2018 EmONC facility network using (A) Road uncertainty, (B) Landcover uncertainty, and (C) Total uncertainty.



## SUPPLEMENTARY MATERIAL

## Supplement 1: travel scenario tables

**Walking & Motorized scenario**

| <b>class</b> | <b>label</b>                                        | <b>Speed (km/h)</b> | <b>mode</b> |
|--------------|-----------------------------------------------------|---------------------|-------------|
| 11           | Forets denses                                       | 1.5                 | WALKING     |
| 12           | Forets riveraines                                   | 1.5                 | WALKING     |
| 13           | Forets claires,<br>savanes boisées                  | 1.5                 | WALKING     |
| 14           | Savane arborée,<br>arbustive                        | 1.5                 | WALKING     |
| 16           | Plantations                                         | 3                   | WALKING     |
| 17           | Fourrées                                            | 3                   | WALKING     |
| 21           | Cultures et<br>Jachères                             | 3                   | WALKING     |
| 22           | Cultures sans<br>arbres                             | 3                   | WALKING     |
| 32           | Savanes herbeuses                                   | 3                   | WALKING     |
| 41           | Agglomérations et<br>infra, plantations<br>urbaines | 3                   | WALKING     |
| 61           | Sols nus, roches,<br>carrières, plage               | 3                   | WALKING     |
| 1000         | Pistes rurales                                      | 15                  | MOTORIZED   |
| 1002         | Routes bitumées<br>rurales                          | 80                  | MOTORIZED   |
| 1003         | Routes secondaires<br>rurales                       | 40                  | MOTORIZED   |
| 1004         | Pistes urbaines                                     | 10                  | MOTORIZED   |
| 1005         | Routes bitumées<br>urbaines                         | 30                  | MOTORIZED   |
| 1006         | Routes secondaires<br>urbaines                      | 20                  | MOTORIZED   |

**Motorcycle-taxi scenario**

| <b>class</b> | <b>label</b>                       | <b>Speed (km/h)</b> | <b>mode</b> |
|--------------|------------------------------------|---------------------|-------------|
| 11           | Forets denses                      | 8                   | MOTORIZED   |
| 12           | Forets riveraines                  | 8                   | MOTORIZED   |
| 13           | Forets claires,<br>savanes boisées | 8                   | MOTORIZED   |
| 14           | Savane arborée,<br>arbustive       | 8                   | MOTORIZED   |
| 16           | Plantations                        | 10                  | MOTORIZED   |
| 17           | Fourrées                           | 8                   | MOTORIZED   |
| 21           | Cultures et<br>Jachères            | 10                  | MOTORIZED   |

|      |                                               |    |           |
|------|-----------------------------------------------|----|-----------|
| 22   | Cultures sans arbres                          | 10 | MOTORIZED |
| 32   | Savanes herbeuses                             | 12 | MOTORIZED |
| 41   | Agglomérations et infra, plantations urbaines | 7  | MOTORIZED |
| 61   | Sols nus, roches, carrières, plage            | 7  | MOTORIZED |
| 1000 | Pistes                                        | 15 | MOTORIZED |
| 1002 | Routes bitumées                               | 40 | MOTORIZED |
| 1003 | Routes secondaires                            | 20 | MOTORIZED |
| 1004 | Pistes urbaines                               | 10 | MOTORIZED |
| 1005 | Routes bitumées urbaines                      | 30 | MOTORIZED |
| 1006 | Routes secondaires urbaines                   | 15 | MOTORIZED |

### Walking scenario

| class | label                                         | Speed (km/h) | mode    |
|-------|-----------------------------------------------|--------------|---------|
| 11    | Forets denses                                 | 1.5          | WALKING |
| 12    | Forets riveraines                             | 1.5          | WALKING |
| 13    | Forets claires, savanes boisées               | 1.5          | WALKING |
| 14    | Savane arborée, arbustive                     | 1.5          | WALKING |
| 16    | Plantations                                   | 3            | WALKING |
| 17    | Fourrées                                      | 3            | WALKING |
| 21    | Cultures et Jachères                          | 3            | WALKING |
| 22    | Cultures sans arbres                          | 3            | WALKING |
| 32    | Savanes herbeuses                             | 3            | WALKING |
| 41    | Agglomérations et infra, plantations urbaines | 3            | WALKING |
| 61    | Sols nus, roches, carrières, plage            | 3            | WALKING |
| 1000  | Pistes                                        | 4            | WALKING |
| 1002  | Routes bitumées                               | 4            | WALKING |
| 1003  | Routes secondaires                            | 4            | WALKING |
| 1004  | Pistes urbaines                               | 4            | WALKING |
| 1005  | Routes bitumées urbaines                      | 4            | WALKING |
| 1006  | Routes secondaires urbaines                   | 4            | WALKING |

## Supplement 2: Preparation of input geospatial data

All following geospatial data sets were prepared using QGIS ver. 3.2.0. After finalization, each of them was changed to raster format (if needed), resampled to 100m resolution, and projected in the WGS84 Universal Transverse Mercator (zone 31N) coordinate reference system.

### Road network

We used the road network created by the *Direction de la Cartographie national et du cadastre* of Togo. In 2015, GIS experts from the national Togolese Institute for Statistics, Economic and Demographic studies (INSEED), in collaboration with technicians from the National Ministry of Public Works and Transportation, re-categorized this road data set into three hierarchical categories: asphalted roads, secondary roads, and tracks (see figure 1B).

### Barriers to movement

Water bodies were considered as barriers to terrestrial movements, unless a road segment crosses over, which is assumed to be a bridge. Rivers were recoded into two categories by the INSEED GIS experts, distinguishing permanent and seasonal rivers. We used both categories as barriers to movement in our accessibility models, reflecting our conservative approach of considering a maximum of potential barriers.

### Land cover

The land cover data set was provided by INSEED. We assumed that different land cover categories can influence travel speed (e.g., travel is slower in a dense forest than in an open area), each of these land cover categories can be given a distinct travel speed in the travel scenario. The landcover category representing bodies of water was extracted from the landcover and used as an additional barrier to movement. Using the "Merge land cover" tool in AccessMod, the land cover raster was merged with the road network and the various barriers to movement, in order to obtain the final "merged land cover" on which travel models are applied. For the merging process, roads were stacked above the barriers, so that any existing road passing over a barrier was considered passable.

### Population density

Population densities were derived from the Worldpop data set[1]. This data set is at 3-arc second resolution (90m at the equator) and is appropriate for our analyses as the modelling technique to obtain it uses a detailed settlement mapping and links these settlements with gazetteer population numbers, considering that the vast majority of people live within a settlement. The remaining unaccounted-for population is then distributed using a weighted landcover grid in function of the probability of being populated, and the total population estimates are adjusted to UN estimates[2]. We used the UN-adjusted 2013 and 2018 Worldpop data sets for Togo.

A final correction step consisted in correcting for the population falling in pixels that were assigned a barrier status in the merged landcover data set, because this population is not considered by the accessibility analysis and is left unaccounted for. To correct for that, we extracted the population in each barrier pixel and dispatched it uniformly within the surface of the prefecture area the pixel belongs to. This way the population in each prefecture was correctly represented, even if a large number of barrier pixels are found. This step was done in AccessMod using the « Adjust population distribution» module.

Supplement 3: Travel time maps for the walking-only model

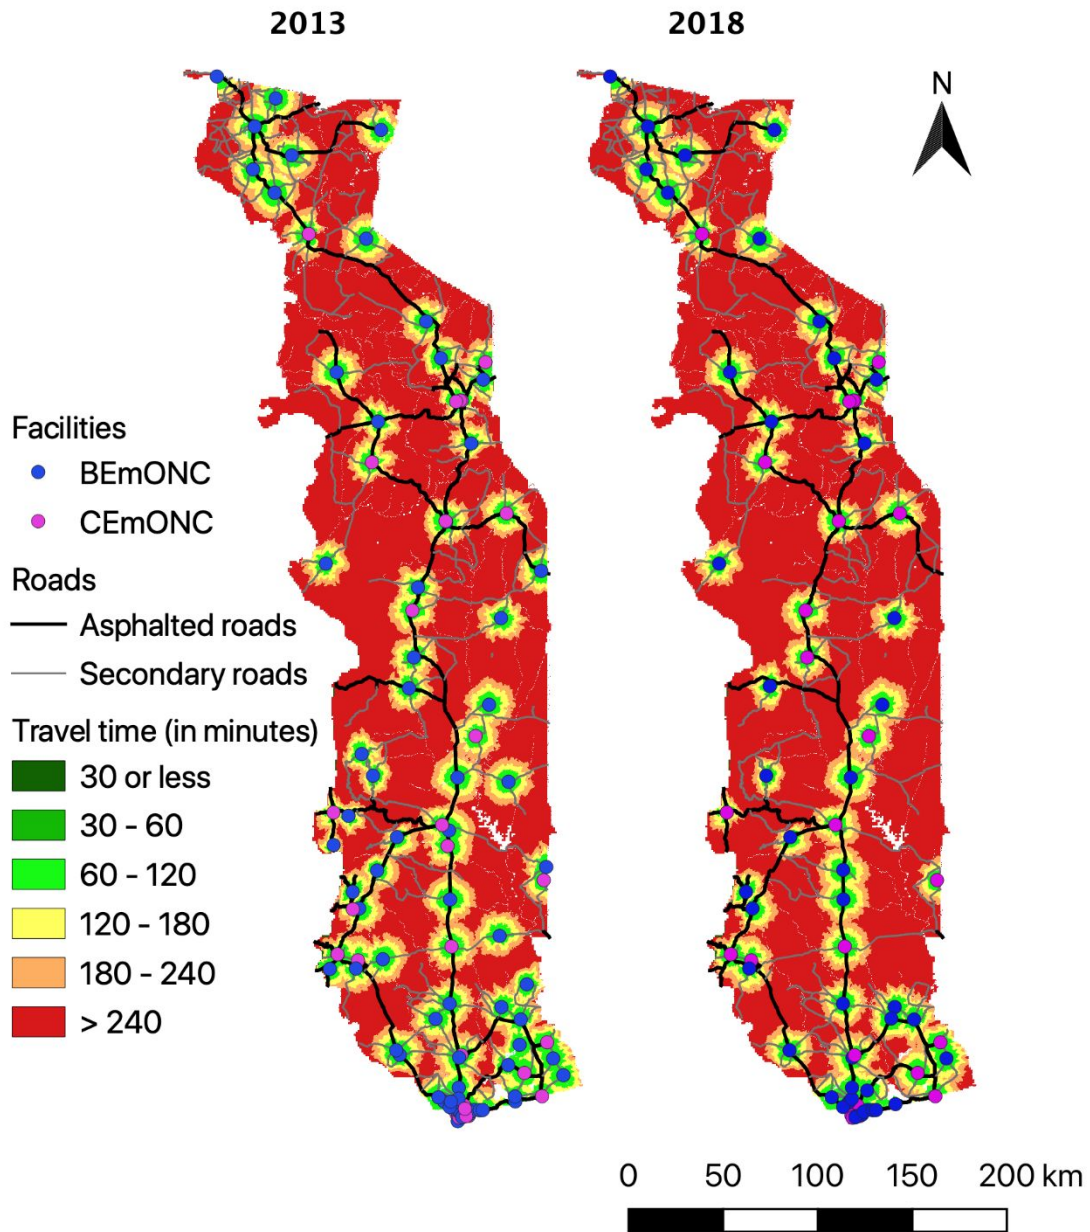

**Supplement 4: Table of percentage of population living within 2-hour travel time to the nearest EmONC facility, per prefecture, with uncertainty intervals within brackets, and for the walking & motorized and the motorcycle-taxi scenarios**

| <i>Prefectures</i> | <b>Walking &amp; Motorized scenario</b> |                    | <b>Motorcycle-taxi scenario</b> |                    |
|--------------------|-----------------------------------------|--------------------|---------------------------------|--------------------|
|                    | <i>1-hour</i>                           | <i>2-hour</i>      | <i>1-hour</i>                   | <i>2-hour</i>      |
| Agoenyive          | 100 [99.6 - 100]                        | 100 [100 - 100]    | 100 [100 - 100]                 | 100 [100 - 100]    |
| Agou               | 73.4 [59.9 - 83.5]                      | 99.7 [96.3 - 99.9] | 69.3 [57.8 - 78.7]              | 99.9 [94.4 - 100]  |
| Akebou             | 46.7 [31.7 - 61.5]                      | 93.4 [84.3 - 96.3] | 42.9 [23.7 - 55.9]              | 92.3 [75.3 - 100]  |
| Amou               | 67.3 [55.3 - 76.3]                      | 92.2 [86.5 - 95.4] | 74.4 [64.9 - 83.5]              | 99.3 [94.4 - 100]  |
| Anie               | 41.5 [35.5 - 48]                        | 74 [61.2 - 88.3]   | 41.6 [37.2 - 44.7]              | 61.6 [52.3 - 71.3] |
| Assoli             | 56.5 [41.2 - 67.3]                      | 90.5 [82.2 - 94.7] | 77.7 [65.1 - 85.3]              | 99.6 [95.5 - 100]  |
| Ave                | 76.3 [66.8 - 82.5]                      | 94.8 [89.9 - 97.3] | 85.2 [75.6 - 93.3]              | 100 [99.9 - 100]   |
| Bas-Mono           | 88.3 [82.2 - 92]                        | 98.6 [96.4 - 99.4] | 98.9 [94.9 - 99.6]              | 99.6 [99.6 - 99.6] |
| Bassar             | 57.5 [46.9 - 67.1]                      | 87.2 [80.4 - 90.8] | 64.5 [54.2 - 71.7]              | 92.8 [84.4 - 97]   |
| Binah              | 85.9 [77.3 - 91.6]                      | 97.9 [96.6 - 98.6] | 85.4 [77.7 - 90.5]              | 100 [97.3 - 100]   |
| Blitta             | 81.4 [72.7 - 87.5]                      | 97.1 [94.4 - 98.2] | 84.3 [78.8 - 89.8]              | 98.3 [95 - 99.9]   |
| Cinkasse           | 99.3 [93.5 - 99.6]                      | 99.9 [99.9 - 99.9] | 94.5 [67.9 - 100]               | 100 [100 - 100]    |
| Dankpen            | 48.3 [37.2 - 57.4]                      | 83.3 [71.7 - 90.5] | 42.2 [32.7 - 52]                | 83.3 [69.1 - 93.4] |
| Danyi              | 76.8 [64.9 - 85.9]                      | 98.1 [94.8 - 99.2] | 92.5 [81.1 - 97.2]              | 100 [100 - 100]    |
| Doufelgou          | 53.3 [44.3 - 61.8]                      | 88 [77.7 - 93]     | 62.4 [51.1 - 71.3]              | 95.6 [84.4 - 99.8] |
| Est-Mono           | 37.3 [26.9 - 45.4]                      | 75 [62.8 - 86.6]   | 38.9 [28 - 46.8]                | 78.5 [61.6 - 94.1] |
| Golfe              | 100 [99.5 - 100]                        | 100 [100 - 100]    | 100 [100 - 100]                 | 100 [100 - 100]    |
| Haho               | 50 [38 - 61.4]                          | 89.7 [78.8 - 94.9] | 49.7 [41 - 58.4]                | 85.1 [74 - 94]     |
| Keran              | 42 [29.5 - 54.9]                        | 87.8 [74.9 - 93.3] | 34.4 [26.3 - 42.7]              | 86 [64.7 - 97.7]   |
| Kloto              | 85.5 [76.7 - 91.9]                      | 99.4 [98 - 99.7]   | 97.2 [90.5 - 99.8]              | 100 [100 - 100]    |
| Kozah              | 85.2 [76.6 - 90.3]                      | 97.1 [95.1 - 98.1] | 92.9 [87.6 - 95.9]              | 100 [99.8 - 100]   |
| Kpele              | 71.8 [62.3 - 80.1]                      | 98.2 [91.3 - 99.7] | 78.4 [71.8 - 84.3]              | 99.6 [94.2 - 100]  |
| Kpendjal           | 64.2 [47.9 - 76.5]                      | 98.7 [92.9 - 99.8] | 59.7 [38.6 - 74.8]              | 99.5 [92.8 - 100]  |
| Lacs               | 94.9 [91.1 - 97.1]                      | 99.7 [99 - 100]    | 95.4 [91.5 - 97.8]              | 100 [99.9 - 100]   |
| Lomé<br>Commune    | 100 [100 - 100]                         | 100 [100 - 100]    | 100 [100 - 100]                 | 100 [100 - 100]    |
| Moyen-Mono         | 39.6 [25.9 - 50.9]                      | 94 [79.8 - 98.2]   | 42.6 [34.4 - 50.6]              | 90.7 [66.3 - 99.3] |
| Naki-Ouest         | 77.5 [60.5 - 89.8]                      | 99.7 [98.5 - 100]  | 64.3 [49.3 - 77.9]              | 100 [97.8 - 100]   |
| Ogou               | 54.9 [44.2 - 66.3]                      | 95.9 [85.7 - 99.2] | 54.9 [46.7 - 62.9]              | 93.2 [79.1 - 99.9] |
| Oti                | 79.3 [68.4 - 86.2]                      | 97.7 [93.5 - 98.8] | 78.4 [67.6 - 86.4]              | 98 [96.1 - 99.4]   |
| Oti-Sud            | 47.8 [33.5 - 58.5]                      | 95.3 [83.1 - 98.6] | 36.7 [23.6 - 49.8]              | 87.4 [69.7 - 99.4] |
| Plaine de Mo       | 33.8 [21.1 - 45.9]                      | 72.8 [62.8 - 78.8] | 37.3 [24 - 52.7]                | 87.3 [75.7 - 94.1] |
| Sotouboua          | 42.4 [31.5 - 52.7]                      | 75.2 [67.8 - 77.9] | 49.9 [40.1 - 57.8]              | 82.2 [70.4 - 89.6] |
| Tandjoare          | 85.6 [76.7 - 91.2]                      | 99.8 [98.3 - 100]  | 76.2 [65.5 - 84.7]              | 98.6 [92.9 - 100]  |
| Tchamba            | 54.9 [37.3 - 67.9]                      | 90.2 [83.7 - 93.4] | 45.9 [33.4 - 60.9]              | 96.5 [88.8 - 99.2] |
| Tchaoudjo          | 65 [53.3 - 74.8]                        | 93.4 [88 - 95.7]   | 71.8 [57.6 - 80.1]              | 98.5 [92.4 - 99.5] |
| Tone               | 91.8 [80.5 - 97.4]                      | 100 [99.9 - 100]   | 82.4 [71.9 - 89.2]              | 99.9 [98.5 - 100]  |
| Vo                 | 85.6 [70.3 - 93.2]                      | 99.4 [98.3 - 99.8] | 95.5 [83.9 - 99.5]              | 100 [100 - 100]    |

|                |                         |                           |                           |                         |
|----------------|-------------------------|---------------------------|---------------------------|-------------------------|
| Wawa           | 51.6 [36 - 65]          | 93 [83.2 - 96.8]          | 67.7 [45.3 - 82.3]        | 100 [97.5 - 100]        |
| Yoto           | 82.2 [71.7 - 88.2]      | 95.9 [93.3 - 97.5]        | 87 [78.9 - 92]            | 98.9 [97.2 - 99.6]      |
| Zio            | 87.9 [77.4 - 93.9]      | 99.7 [98.5 - 99.9]        | 93.1 [85.3 - 96.4]        | 100 [99.5 - 100]        |
| <b>Country</b> | <b>78.3 [70.5 - 84]</b> | <b>95.5 [91.6 - 97.5]</b> | <b>79.2 [72.2 - 84.3]</b> | <b>96 [91.6 - 98.4]</b> |

For peer review only

## Supplement 5: Effects of considering slopes to correct for walking speeds

When walking is used in a travel scenario, AccessMod computes the slope between adjacent raster cells using the Digital Elevation Model. Walking speeds are then corrected using the slope value, following the Tobler (1993) formula[3]:

$$V = V_F * e^{-3.5 * |S + 0.05|},$$

where  $V$  is the corrected walking speed in kilometers per hour (Km/h),  $V_F$  is the walking speed on a flat surface (given by the user-defined travel scenario), and  $S$  is the slope in hundredth of percent.

These corrections applied when walking off-road in the "Walking & Motorized scenario", and everywhere in the "Walking scenario". In the table below, the first figure is with considering the slope correction, the second figure is without considering the slope correction.

|                         | Walking & Motorized Scenario |               |               |               | Walking Scenario |               |               |               |
|-------------------------|------------------------------|---------------|---------------|---------------|------------------|---------------|---------------|---------------|
|                         | 2013                         |               | 2018          |               | 2013             |               | 2018          |               |
|                         | <i>1-hour</i>                | <i>2-hour</i> | <i>1-hour</i> | <i>2-hour</i> | <i>1-hour</i>    | <i>2-hour</i> | <i>1-hour</i> | <i>2-hour</i> |
| <b>Regions</b>          |                              |               |               |               |                  |               |               |               |
| <b>Plateaux</b>         | 66.2/67.7                    | 95.1/95.6     | 55.4/56.6     | 89.8/90.3     | 15.5/16.2        | 30.2/31.4     | 10.9/11.4     | 22.6/23.5     |
| <b>Kara</b>             | 63.3/64.3                    | 90.4/90.9     | 62.7/63.6     | 90.2/90.7     | 14.5/15          | 29.7/30.2     | 14.5/14.9     | 29.3/29.8     |
| <b>Maritime</b>         | 94.7/94.8                    | 99.5/99.5     | 94.4/94.5     | 99.4/99.4     | 47.9/48.2        | 74.8/75.1     | 47.7/48       | 76.4/76.5     |
| <b>Centrale</b>         | 70.2/70.6                    | 92.3/92.6     | 65.2/65.6     | 91.7/91.9     | 22/22.3          | 41.3/41.5     | 18.1/18.5     | 35.7/35.9     |
| <b>Savanes</b>          | 81.7/81.9                    | 98.9/99       | 80.7/80.9     | 98.9/99       | 12.1/12.4        | 26.5/27.2     | 11.4/11.6     | 24.2/24.9     |
| <b>Lomé<br/>Commune</b> | 100/100                      | 100/100       | 100/100       | 100/100       | 100/100          | 100/100       | 100/100       | 100/100       |
| <b>Country</b>          | 81/81.5                      | 96.7/98       | 78.3/78.8     | 95.5/95.7     | 34.7/35.1        | 52.3/52.8     | 33.4/33.7     | 50.8/51.2     |

## Supplementary References

1. Worldpop, CIESIN. The spatial distribution of population with country total adjusted to match the corresponding UNPD estimate - Togo [Internet]. 2013 [accessed 08.10.2020]. Available from: [ftp://ftp.worldpop.org.uk/GIS/Population/Global\\_2000\\_2020/2019/TGO/tgo\\_ppp\\_2019\\_U\\_Nadj.tif](ftp://ftp.worldpop.org.uk/GIS/Population/Global_2000_2020/2019/TGO/tgo_ppp_2019_U_Nadj.tif).
2. Linard C, Gilbert M, Snow RW, et al. Population Distribution, Settlement Patterns and Accessibility across Africa in 2010. *PLoS One*. 2012;7(2):8. doi: 10.1371/journal.pone.0031743
3. Tobler W. Three Presentations on Geographical Analysis and Modeling: Non-Isotropic Geographic Modeling; Speculations on the Geometry of Geography; and Global Spatial Analysis. UC Santa Barbara: National Center for Geographic Information and Analysis. ; 1993. [accessed 08.10.2020] <https://escholarship.org/uc/item/05r820mz>



# BMJ Open

## National optimization of accessibility to emergency obstetric and neonatal care in Togo: a geospatial analysis

|                                 |                                                                                                                                                                                                                                                                                                                                                                                                                                                                                                                                                                                                                             |
|---------------------------------|-----------------------------------------------------------------------------------------------------------------------------------------------------------------------------------------------------------------------------------------------------------------------------------------------------------------------------------------------------------------------------------------------------------------------------------------------------------------------------------------------------------------------------------------------------------------------------------------------------------------------------|
| Journal:                        | <i>BMJ Open</i>                                                                                                                                                                                                                                                                                                                                                                                                                                                                                                                                                                                                             |
| Manuscript ID                   | bmjopen-2020-045891.R1                                                                                                                                                                                                                                                                                                                                                                                                                                                                                                                                                                                                      |
| Article Type:                   | Original research                                                                                                                                                                                                                                                                                                                                                                                                                                                                                                                                                                                                           |
| Date Submitted by the Author:   | 26-Apr-2021                                                                                                                                                                                                                                                                                                                                                                                                                                                                                                                                                                                                                 |
| Complete List of Authors:       | Curtis, Andrew; University of Geneva Institute of Global Health, GeoHealth group; Universite de Geneve Institut des Sciences de l'Environnement<br>Monet, Jean-Pierre; UNFPA, Technical Division<br>Brun, Michel; UNFPA, Technical Division<br>Bindaoudou, Issa Abdou-Kérim; National Institute of Statistics and Economic and Demographic Studies<br>Daoudou, Idrissou; Ministry of Health of Togo<br>Schaaf, Marta; Independent Consultant,<br>Agbigbi, Yawo; UNFPA-Togo<br>Ray, Nicolas; University of Geneva Institute of Global Health, GeoHealth group; Universite de Geneve Institut des Sciences de l'Environnement |
| <b>Primary Subject Heading</b>: | Public health                                                                                                                                                                                                                                                                                                                                                                                                                                                                                                                                                                                                               |
| Secondary Subject Heading:      | Obstetrics and gynaecology                                                                                                                                                                                                                                                                                                                                                                                                                                                                                                                                                                                                  |
| Keywords:                       | PUBLIC HEALTH, Maternal medicine < OBSTETRICS, Organisation of health services < HEALTH SERVICES ADMINISTRATION & MANAGEMENT                                                                                                                                                                                                                                                                                                                                                                                                                                                                                                |
|                                 |                                                                                                                                                                                                                                                                                                                                                                                                                                                                                                                                                                                                                             |

SCHOLARONE™  
Manuscripts



I, the Submitting Author has the right to grant and does grant on behalf of all authors of the Work (as defined in the below author licence), an exclusive licence and/or a non-exclusive licence for contributions from authors who are: i) UK Crown employees; ii) where BMJ has agreed a CC-BY licence shall apply, and/or iii) in accordance with the terms applicable for US Federal Government officers or employees acting as part of their official duties; on a worldwide, perpetual, irrevocable, royalty-free basis to BMJ Publishing Group Ltd ("BMJ") its licensees and where the relevant Journal is co-owned by BMJ to the co-owners of the Journal, to publish the Work in this journal and any other BMJ products and to exploit all rights, as set out in our [licence](#).

The Submitting Author accepts and understands that any supply made under these terms is made by BMJ to the Submitting Author unless you are acting as an employee on behalf of your employer or a postgraduate student of an affiliated institution which is paying any applicable article publishing charge ("APC") for Open Access articles. Where the Submitting Author wishes to make the Work available on an Open Access basis (and intends to pay the relevant APC), the terms of reuse of such Open Access shall be governed by a Creative Commons licence – details of these licences and which [Creative Commons](#) licence will apply to this Work are set out in our licence referred to above.

Other than as permitted in any relevant BMJ Author's Self Archiving Policies, I confirm this Work has not been accepted for publication elsewhere, is not being considered for publication elsewhere and does not duplicate material already published. I confirm all authors consent to publication of this Work and authorise the granting of this licence.

## National optimization of accessibility to emergency obstetric and neonatal care in Togo: a geospatial analysis

Andrew Curtis<sup>1,2</sup>, Jean-Pierre Monet<sup>3</sup>, Michel Brun<sup>3</sup>, Issa Abdou-Kérim Bindaoudou<sup>4</sup>,  
Idrissou Daoudou<sup>5</sup>, Marta Schaaf<sup>6</sup>, Yawo Agbigbi<sup>7</sup>, Nicolas Ray<sup>1,2,\*</sup>

<sup>1</sup> GeoHealth Group, Institute of Global Health, Faculty of Medicine, University of Geneva, Geneva, Switzerland

<sup>2</sup> Institute for Environmental Sciences, University of Geneva, Geneva, Switzerland

<sup>3</sup> Technical Division, United Nations Population Fund (UNFPA), New York City, USA

<sup>4</sup> National Institute of Statistics and Economic and Demographic Studies (INSEED), Lomé, Togo

<sup>5</sup> Ministry of Health, Lomé, Togo

<sup>6</sup> Independent Consultant, New York City, USA

<sup>7</sup> United Nations Population Fund (UNFPA), Lomé, Togo

Corresponding author: Prof. Nicolas Ray, nicolas.ray@unige.ch, GeoHealth group, Institute of Global Health, Faculty of Medicine, Campus Biotech, Chemin des Mines 9, 1202 Geneva, Switzerland

## Abstract

**Objectives:** Improving access to emergency obstetrical and neonatal care (EmONC) is a key strategy for reducing maternal and neonatal mortality. Access is shaped by several factors, including service availability and geographic accessibility. In 2013, the Ministry of Health (MoH) of Togo used service availability and other criteria to designate particular facilities as EmONC facilities, facilitating efficient allocation of limited resources. In 2018, the MoH further revised and rationalized this health facility network by applying an innovative methodology using health facility characteristics and geographical accessibility modelling to optimize timely access to EmONC services. This study compares the geographic accessibility of the network established in 2013 and the smaller network developed in 2018.

**Design:** We used data regarding travel modes and speeds, geographic barriers, and topographic and urban constraints, to estimate travel times to the nearest EmONC facilities. We compared the EmONC network of 109 facilities established in 2013 with the one composed of 73 facilities established in 2018, using three travel scenarios (walking and motorized, motorcycle-taxi, and walking-only).

**Results:** When walking and motorized travel is considered, the 2013 EmONC network covers 81.0% and 96.6% of the population at the 1-hour and 2-hour limit, respectively. These figures are slightly higher when motorcycle-taxis are considered (82.8% and 98.0%), and decrease to 34.7% and 52.3% for the walking-only scenario. The 2018 prioritized EmONC network covers 78.3% (1-hour) and 95.5% (2-hour) of the population for the walking and motorized scenario.

**Conclusions:** By factoring in geographical accessibility modeling to our iterative EmONC prioritization process, the MoH was able to decrease the designated number of EmONC facilities in Togo by about 30%, while still ensuring that a high proportion of the population has timely access to these services. However, the physical access to EmONC for women unable to afford motorized transport remains inequitable.

**Keywords:** maternal health, universal health coverage, geospatial modelling, physical accessibility, health system strengthening

### Strengths and limitations of this study

- This is the first study presenting an improvement of a network of EmONC facilities, based on the characteristics of these facilities and on realistic physical accessibility modelling.
- Country-based experts estimated the modes and speeds of transport on the various road types and off-road landcover categories, and associated uncertainty analyses assessing relative effect of travel speeds were performed.
- The EmONC prioritization approach succeeded in prioritizing 73 out of the initial 109 EmONC facilities, with only a marginal drop of population coverage. This will enable efficient use of limited resources.
- Only the physical accessibility to nearest designated EmONC services was modelled, but potential financial barriers and the fact that some patients could opt to bypass the nearest facility may also affect access to EmONC.
- Travel was modelled only for the dry season conditions, but degraded road conditions in certain parts of the country during the wet season may affect our estimates of EmONC accessibility.

## INTRODUCTION

The Sustainable Development Goal 3 (SDG3) aims to better health outcomes for different at-risk groups, including pregnant women (SDG3.1) and children under 5 years of age (SDG3.2). One of the primary strategies for reducing maternal and neonatal mortality and morbidity is ensuring timely access to quality emergency obstetric and neonatal care (EmONC)[1]. However, access to EmONC is still a challenge in many low-income countries, especially in sub-Saharan Africa[2].

Because the physical distance to facilities has long been recognized as an important component of timely access to care[3, 4], an adequate geographic distribution of EmONC facilities is a prerequisite to minimize travel times for women in need of EmONC. The World Health Organization (WHO) recommends a benchmark of no more than 2 hours of travel time to reach the nearest EmONC facility[5], as after 2 hours, an obstetric hemorrhage can be fatal.

Realistically modelling and measuring spatial accessibility to health services is therefore very important for adequate planning and improvement of access to quality healthcare for pregnant women and newborns[6]. Some studies have used simple distances[7] and time[8] metrics, as well as population-to-provider ratios (PPRs)[9]. These metrics have been popular for their ease of use and minimal need for the input of spatial data layers, i.e. data that both provide locations and describe characteristics of geographic features[10].

However, these methods are not appropriate for modelling geographic accessibility in complex terrains where different modes of transport are potentially used for a single trip, and when patients seeking care are facing an emergency, where every minute of travel time is consequential. In such cases, approaches based on least-cost path modelling (i.e., finding the fastest route between locations based on various travel constraints) have proved useful to estimate time and routing to reach the nearest care providers, and to model catchment areas of facilities[10]. Applying this modelling approach, the AccessMod tool[11] helps estimate geographic accessibility by taking into consideration the modes of transport, their respective speeds of travel on roads and off-road on various landcover types, and the influence of the topography and other barriers to movement. Studies assessing the accessibility of a variety of health care destinations have used AccessMod in their analyses[12-19]. Specific to accessibility to EmONC, Ebener and colleagues[20] have recently formalized and proposed new indicators based on least-cost path modelling.

The main objective of this study was to realistically determine and compare the overall geographic accessibility of our target population (women with obstetrical complications in need of EmONC) to two EmONC facility networks: the first one designated by the Ministry of Health

(MoH) in 2013 and the second one in 2018 through a methodology using accessibility modelling. The comparison of the two networks in terms of physical accessibility and population coverage is very useful in Togo, a country where (i) the probability of being attended at birth by qualified personnel is strongly linked to socio-economic status and where (ii) three-quarters of maternal deaths are due to direct obstetrical complications, which could for the most part be avoided if those experiencing complications have access to quality EmONC in less than two hours. We defined and applied various travel scenarios based on inputs from national and sub-national stakeholders, including speed and transport modes and their associated uncertainties. Besides expanding knowledge on the underlying mechanisms of geographical access to EmONC facilities in Togo, we described a robust spatially-explicit methodology for quantifying the population covered by networks of EmONC health facilities that can be replicated in other countries.

## DATA AND METHODS

### Study site and context

Togo is one of the smallest African countries in terms of landmass (approximately 56,785 km<sup>2</sup>), with a population of approximately 7.9 million in 2018[21], and it is bordered by Benin to the east, Ghana to the west and Burkina Faso to the north. More than 40% of the total population live in the southern part of the country (in the region of Maritime and in the capital city of Lomé), with 42% of this population living in urban areas[22]. The 2017 Multiple Indicator Cluster Survey (MICS 6) for Togo[23] determined that there is a strong correlation between poverty and maternal mortality and morbidity. Indeed, the probability of giving birth assisted by qualified personnel is found to be highly correlated to socio-economic status and to place of residence. The aforementioned survey determined that 98% of women in the richest quintile are assisted at birth by skilled health personal, compared to only 52% of the poorest quintile. It also highlighted the fact that 98% of women living in urban settings receive skilled birth attendance, as compared to 65% of women living in rural settings. Three quarters of maternal deaths were found to be due to direct obstetrical causes. This suggests that access to timely EmONC is essential for reducing maternal mortality in Togo.

The 2017-2022 national plan for health sector development in Togo[24] highlights that morbidity and mortality rates for mothers and newborns are still very high, and notes that this is due to insufficient supply of obstetric and neonatal care and by barriers to service access,

1  
2  
3 including financial barriers. Despite some progress over the last decades, maternal and newborn  
4 mortality are still high in Togo respectively, with 396 (80% CI: 270-557) maternal deaths per  
5 100,000 live births in 2017[24] and 25 neonatal deaths per 1,000 live births in 2018[2].  
6  
7 Improving access to quality EmONC services has been a priority for the government since the  
8 EmONC needs assessment of 2012. In 2013, the MoH used facility data to identify 109 priority  
9 health facilities designated to provide EmONC services, and launched a process to monitor  
10 them on a quarterly basis to assess and address gaps in availability and quality of care. This  
11 national network encompassed both government and NGO facilities, and its selection was done  
12 considering several pieces of information on each facility: obstetric activity (i.e., favoring those  
13 with more than 30 deliveries/month), qualified human resources, capacity to organize referrals,  
14 gaps in EmONC signal functions and adequate geographic distribution. EmONC facility  
15 functionality requires enough qualified providers for 24h/7d services and the availability of key  
16 equipment, consumables, and medication for performing the key medical interventions (or  
17 signal functions) that are used to treat the direct obstetric complications that cause the vast  
18 majority of maternal deaths.  
19  
20

21  
22 While the focus on a prioritized set of health facilities led to some progress in the  
23 availability of services, for example the increase of the proportion of EmONC facilities  
24 applying vacuum extractions from 24% in 2014 to 43% in 2016, the MoH decided in 2018 to  
25 further focus their efforts and resource allocation by further decreasing the number of priority  
26 facilities; the MoH ultimately selected 73 health facilities that should provide EmONC services  
27 in the country. This selection was guided by a methodology developed by UNFPA and  
28 formalized and described in UNFPA's EmONC Network Development Implementation  
29 Manual[25]. In brief, this methodology, based on WHO, UNFPA, and UNICEF  
30 recommendations[5], helps countries to identify a network of EmONC facilities by selecting a  
31 number of EmONC facilities that do not exceed the international norm of 5 EmONC facilities  
32 per 500,000 population, and, by prioritizing facilities that can most feasibly be supported to  
33 actually provide all the relevant EmONC signal functions 24h/7d (see Box 1) with quality care,  
34 during the next programmatic cycle of the MoH (i.e. in the next 3-4 years). The selection of  
35 health facilities is done by considering both health facility characteristics (e.g. number of  
36 deliveries, human resources, gaps in EmONC signal functions, infrastructure) and two  
37 spatially-explicit indicators[20]: the population living within 1 and/or 2-hour maximum travel  
38 time from the nearest EmONC facility (i.e. population coverage), and the quality of each  
39 referral linkage between Basic EmONC (BEmONC) health facilities and their closest  
40 Comprehensive EmONC (CEmONC) health facility. BEmONC health facilities should provide  
41  
42  
43  
44  
45  
46  
47  
48  
49  
50  
51  
52  
53  
54  
55  
56  
57  
58  
59  
60



seven EmONC signal functions 24h/7d while CEmONC health facilities provide nine EmONC signal functions (see Box 1). An EmONC facility is considered as functioning when it provides services 24h/7d, and when it has performed all seven (BEmONC) or all nine (CEmONC) signal functions in the three months prior to data collection[5]. A non-functioning EmONC facility has failed to provide one or more EmONC signal function during that same period.

**Box 1:** Emergency obstetrical and neonatal care (EmONC) signal functions

| Services available 24h/24 and 7d/7           |                                                      |
|----------------------------------------------|------------------------------------------------------|
| <b>Basic EmONC (BEmONC) signal functions</b> | <b>Comprehensive EmONC (CEmONC) signal functions</b> |
| 1) Administer parenteral antibiotics         | BEmONC signal functions (1-7)                        |
| 2) Administer uterotonic drugs               | +                                                    |
| 3) Administer parenteral anticonvulsants     | 8) Perform blood transfusion                         |
| 4) Perform manual removal of the placenta,   | 9) Perform Caesarean section.                        |
| 5) Remove retained products                  |                                                      |
| 6) Perform assisted vaginal delivery         |                                                      |
| 7) Perform basic neonatal resuscitation.     |                                                      |

### Accessibility & population coverage modelling

We used AccessMod, a WHO stand-alone and open-source geospatial tool[11, 26], to analyze the physical accessibility to, and the population coverage of, the national networks of EmONC health facilities in Togo in 2013 and 2018. AccessMod is based on a least-cost path algorithm that computes the fastest route between any location and the nearest health service (for details, see [11]). It can consider several sequential modes of travel (e.g. walking to a road, where one catches a motorized vehicle), several types of barriers to movement, health facility capacity, and population, when determining catchment areas. Moreover, AccessMod considers the direction of movement by applying an anisotropic analysis, i.e. considering the slope of the terrain to accurately model bicycling and walking speeds. Contrary to many accessibility modelling approaches that are based on a perfectly routable road data set (such as Nichols et al[27]), AccessMod can consider off-road travel in addition to road travel. On- and off-road travel speeds and modes of transport are user-defined in a travel scenario that assigns these travel constraints to each land cover and/or road category found in the input data.

1  
2  
3 For the movements of our target population, we defined three distinct travel scenarios  
4 from home to the nearest EmONC facility: 1) a walking & motorized scenario, 2) a motorcycle-  
5 taxi scenario, and 3) a walking-only scenario. The first scenario assumes that patients walk to  
6 the nearest road and then use a motorized mode of transportation (car, minibus or other  
7 motorized vehicle, either private or public), immediately available, to continue their journey.  
8 In the second scenario, patients use only a motorcycle-taxi to travel on- and off-road, with  
9 different speeds depending on the land cover. Finally, the third scenario assumes patients are  
10 walking or being carried (e.g. on stretchers, carts) at walking speed (or lower).  
11  
12

13  
14  
15 The choice for these three scenarios and their associated modes and speeds of travel  
16 were decided through an iterative process of two workshops in Togo in 2016-2018. A first 3-  
17 day workshop took place in May 2016 to strengthen national capacity to analyze the geographic  
18 accessibility of health facilities in Togo by using AccessMod. The thirty Togolese participants  
19 were technical experts from the MoH, the national Togolese Institute for Statistics, Economic  
20 and Demographic studies (INSEED), NGOs and UN agencies, and other key stakeholders (e.g.,  
21 regional health director, monitoring expert) from all regions of Togo. The pool of experts  
22 discussed and agreed on the specifics of how women with obstetrical emergency typically travel  
23 when they need to reach an EmONC facility in Togo. Average speeds of travel on all road  
24 categories were estimated by consensus, with the walking & motorized scenario deemed to be  
25 the most frequent. During a second workshop in May 2018, health stakeholders from each of  
26 the 6 regions of Togo gathered to define which health facilities should comprise their EmONC  
27 facility regional network, using the prioritization methodology described above to select a  
28 number of EmONC facilities per region not exceeding the international norm of 5 EmONC  
29 facilities per 500,000 population. These participants further refined the travel scenarios, and  
30 agreed that bicycles and public transport were rarely used, with the exception of a public bus  
31 system operating in greater Lomé [28]. In both workshops, participants recognized that during  
32 the wet season the speeds of travel generally decrease in many areas. However, they decided to  
33 use only a dry season scenario to guide planning as this is the longest season in Togo (around  
34 8 months). The final travel speeds chosen for the three scenarios are found in Supplement 1.  
35  
36

37  
38  
39 Road speeds in urban areas were adjusted in order to simulate slower motorized travel  
40 occurring in intra-urban contexts due to various factors such as stoplights, traffic, pedestrians,  
41 and other hazards. For the walking & motorized scenario, we lowered travel speeds on asphalted  
42 roads, secondary roads and tracks to 40km/h, 30km/h and 10 km/h, respectively. For the  
43 motorcycle-taxi scenario, these average travel speeds were lowered to 30 km/h, 15 km/h and  
44  
45  
46  
47  
48  
49  
50  
51  
52  
53  
54  
55  
56  
57  
58  
59  
60

1  
2  
3 10 km/h. These speed corrections were applied on all road segments falling within the extent  
4 of the urban areas informed by the Global Rural Urban Mapping Project[29].  
5  
6  
7

## 8 **Uncertainty analysis**

9  
10 To account for uncertainty in travel speeds, we additionally ran each consensus travel  
11 scenario with 20% slower or 20% faster speeds compared to the consensus scenario, following  
12 the methodology developed in Ouma et al.[17] and in Stewart et al.[30]. This translated to lower  
13 and upper uncertainty bounds on the reported output statistics. To further disentangle the effects  
14 of uncertainties on the speeds on roads and off roads, we ran scenario 1 by keeping on-road  
15 speeds constant (at consensus values) and varying off-road speeds by the plus or minus 20%.  
16 Conversely, we ran this scenario keeping off-road speeds constant and varying on-road speeds.  
17 Finally, to test the model's sensitivity to the consideration of topography, we also ran each  
18 consensus travel speed scenario without considering slope correction (i.e., isotropic mode).  
19  
20  
21  
22  
23  
24

25 Two uncertainty indicators were produced: (1) lower and upper uncertainty bounds on  
26 the variation in percentage (per region and for the whole country) of the coverage of population  
27 living less than one and less than two hours away from the closest EmONC facility, and (2) a  
28 series of spatially-explicit uncertainty maps. In these uncertainty maps, pixel values indicate  
29 the extent of the uncertainty of travel time to the nearest EmONC facility, obtained by  
30 subtracting the travel time grid resulting from the "- 20%" travel speeds scenario by the one  
31 resulting from the "+ 20%" travel speeds scenario. This highlights the areas in the country where  
32 the travel time results are the most uncertain.  
33  
34  
35  
36  
37  
38  
39  
40

## 41 **Input geospatial data**

42  
43 Various datasets were assembled and prepared to run the geospatial analyses in  
44 AccessMod (details of the preparation steps are found in Supplement 2). We considered barriers  
45 to terrestrial movements composed of quarries and bodies of water, such as rivers, lakes and  
46 damned areas. The barriers file was created by the Togolese Ministry of Agriculture, Livestock  
47 and Hydraulics[31] (figure 1A). We used the road network created by the *Direction de la*  
48 *Cartographie nationale et du cadastre* of Togo, classified in three hierarchical categories:  
49 asphalted roads, secondary roads, and tracks[32] (figure 1B). We obtained the Digital Elevation  
50 Model (DEM) of Togo from NASA' Shuttle Radar Topography Mission[33] (figure 1C).  
51 Slopes were derived from the DEM directly in AccessMod.  
52  
53  
54  
55  
56  
57  
58  
59  
60

1  
2  
3 We used the population density data set from the Worldpop project[34], provided with  
4 UN-adjusted population count from 2013 (figure 1D) and 2018 (figure 1E). We assumed that  
5 the target population of women with obstetrical complications is uniformly distributed across  
6 the overall population. Land cover information was provided by INSEED, with a land cover  
7 data set composed of twelve categories (figure 1F). We obtained the names and geographic  
8 coordinates of the 109 EmONC facilities composing the initial national network of EmONC  
9 health facilities in 2013 from INSEED (figure 1G). We further verified these names and  
10 coordinates with the help of the MoH. For the EmONC health facilities network of 2018 (figure  
11 1H), the 73 final designated set of facilities was obtained through the MoH[35]. Finally, the  
12 most recent administrative boundaries at the prefectural, regional and national levels were  
13 created and made available by INSEED using data collected during the 2010 general census[36]  
14 (see figure 1I). These datasets were used to determine the percentage of population coverage  
15 for each administrative unit.  
16  
17  
18  
19  
20  
21  
22  
23  
24  
25  
26

## 27 **Patients and the public involvement**

28  
29  
30 There was no patient or public involvement in this study. Health facility names and  
31 geographic coordinates, as well as administrative boundaries, were shared by INSEED. The  
32 road network was shared by the *Direction de la Cartographie nationale et du cadastre* of  
33 Togo. The barriers to movement datasets were provided by the *Ministère de l'agriculture, de*  
34 *la production animale et halieutique*. All other geospatial data were publicly available.  
35  
36  
37  
38  
39  
40  
41

## 42 **RESULTS**

43  
44 The accessibility maps for the walking & motorized scenario, and the motorcycle-taxi  
45 scenario, and for the two time periods, are shown in figure 2, with the respective maps for the  
46 walking-only scenario in Supplement 3. In 2013, estimated physical access was highest under  
47 scenario 2 (motorcycle-taxi scenario), with 82.8% of the total population less than one hour  
48 away from the nearest EmONC health facility, and 98% less than two hours away from the  
49 nearest EmONC health facility. For the walking & motorized scenario, these estimations are  
50 81% at the 1-hour travel time limit and 96.7% at the 2-hour limit respectively.  
51  
52  
53

54  
55 Using the 2018 network of 73 facilities, population coverages using the motorcycle-taxi  
56 scenario are 79.2% at the 1-hour travel time limit and of 96% at the 2-hour limit. Compared to  
57 the 2013 network, these population coverages are lower by 3.6% (of the total population) at the  
58  
59  
60

1-hour threshold and by 2% at the 2-hour limit. With the walking & motorized scenario, the corresponding results are 78.3% at the 1-hour limit and 95.5% at the 2-hour limit. Compared to the initial estimations for the 2013 network, population coverage for that scenario has only dropped by 2.7% and 1.2% respectively. Despite a reduction of the number of EmONC health facilities by one-third from 2013 to 2018, the population able to physically access the closest EmONC health facility within one or two hours is only marginally lower with the 2018 prioritized network.

For both time periods, population coverage at national scale is only marginally higher for the motorcycle-taxi travel scenario when comparing to the walking & motorized scenario, even though this translates to a much larger extent of the country's surface under the 2-hour maximum travel time limit (green areas in figure 2). We also see that accessibility is highly dependent on roads in scenario 1. This is the case for instance in parts of the Atacora mountains (large red areas in the central-western part of the country in figure 2), a region with a very low population density and almost no roads (according to our data). With scenario 2, travel is less dependent on roads than in scenario 1, but access tends nevertheless to be higher around the road network, even though travel speeds on roads are lower for the motorcycle-taxi scenario than for the walking & motorized scenario. The results for the 2018 network at regional level are given in Table 1, and at prefectural level in Supplement 2.

Table 1: Percentage of population living less than one- or two-hour travel time to the nearest EmONC facility, in 2018, per region and for the country, with uncertainty intervals within brackets.

| Region         | Walking & motorized scenario |                           | Motorcycle-taxi scenario  |                           | Walking-only scenario     |                           |
|----------------|------------------------------|---------------------------|---------------------------|---------------------------|---------------------------|---------------------------|
|                | 1-hour                       | 2-hour                    | 1-hour                    | 2-hour                    | 1-hour                    | 2-hour                    |
| Plateaux       | 55.4 [44.4 - 65.1]           | 89.8 [80.7 - 95.2]        | 58.7 [49.2 - 66.3]        | 88.4 [78.5 - 94.6]        | 10.9 [8.3 -13.3]          | 22.6 [18.1 -27.2]         |
| Kara           | 62.7 [52.3 - 71.0]           | 90.2 [82.8 - 94.1]        | 65.2 [56.7 - 72.0]        | 92.8 [84 - 97.7]          | 14.5 [11.0 -17.8]         | 29.3 [23.9 -34.7]         |
| Maritime       | 94.4 [90.1 - 96.7]           | 99.4 [98.6 - 99.7]        | 96.9 [93.7 - 98.5]        | 99.9 [99.7 - 100]         | 47.7 [36.7 -57.0]         | 76.4 [70.2 -80.9]         |
| Centrale       | 65.2 [53.0 - 74.7]           | 91.7 [86.6 - 93.9]        | 66.5 [56.1 - 75.7]        | 96.2 [90.0 - 98.5]        | 18.1 [12.6 -23.4]         | 35.7 [31.3 -38.7]         |
| Savanes        | 80.7 [68.9 - 87.9]           | 98.9 [96.0 - 99.6]        | 72.5 [58.9 - 81.8]        | 97.9 [93.3 - 99.9]        | 11.4 [8.4 -14.2]          | 24.2 [19.1 -30.0]         |
| Lomé Commune   | 100 [100 - 100]              | 100 [100 - 100]           | 100 [100 - 100]           | 100 [100 - 100]           | 100 [93.9 -100]           | 100 [100 -100]            |
| <b>Country</b> | <b>78.3 [70.5 - 84.0]</b>    | <b>95.5 [91.6 - 97.5]</b> | <b>79.2 [72.2 - 84.3]</b> | <b>96.0 [91.6 - 98.4]</b> | <b>33.4 [27.1 - 38.4]</b> | <b>50.8 [46.0 - 55.0]</b> |

The region of Lomé Commune has 100% population coverage for both time thresholds and both motorized scenarios, which is due to the combined effect of a very densely populated region of only 90 km<sup>2</sup> with 11 EmONC facilities in 2018, and a good road network that permits the Lomé population to access the closest EmONC in less than 1 hour travel time. In contrast,

1  
2  
3 the rural region of Plateaux presents much more heterogeneous results, with large uncertainty  
4 intervals. The results at prefectural level are available in Supplement 3.

5  
6 We illustrate in figure 3 the uncertainty in travel time for the walking & motorized  
7 scenario on the 2018 facility dataset, separated for the effects of speed uncertainty on roads and  
8 landcover. The maps show a spatially heterogeneous distribution of the uncertainties, especially  
9 in the case of the road speed uncertainty map with widespread uncertainties in all areas of the  
10 country, but with relatively low uncertainties along the asphalted road network. Similar maps  
11 for the uncertainty linked to the DEM are found in Supplement 4.

12  
13 The landcover and road uncertainty maps show that uncertainty is strongest in areas  
14 with very little population density (see figure 1E). The total uncertainty map, combining  
15 uncertainty from roads and landcover, further highlights the fact that uncertainty is quite low  
16 on roads close to facilities and increases in more rural areas.

17  
18 As expected for the walking-only scenario, national population coverage of the 2018  
19 network drops strongly to 33.4% within 1-hour walking, and 50.8% within 2-hour walking.  
20 Large differences in coverage are found between regions, with the southern more urban regions  
21 of Lomé and Maritime achieving higher accessibility results than the more rural areas of the  
22 country. Indeed, while the two aforementioned regions reach coverage percentages of 100%  
23 and 76.4% respectively at the two-hour threshold, the coverage percentages do not exceed 40%  
24 in all the other regions modelled.

## 25 26 27 28 29 30 31 32 33 34 35 36 37 38 **DISCUSSION**

39  
40 The accessibility maps that were produced according to our three travel models illustrate  
41 the differences in accessibility in different parts of the country. This can help identify areas in  
42 the country where geographic accessibility to EmONC facilities is most difficult. These areas  
43 could be targeted for remedial efforts, such as mobile outreach, posting community health  
44 workers for reducing decision time to seek care, the creation of maternity waiting homes in the  
45 EmONC health facilities of the region, or planning improvement of the road infrastructure.

46  
47 The three alternative models used to obtain these maps reflect different socio-economic  
48 segments of the population. If patients can afford to take a motorized vehicle after having  
49 reached the closest road or use a motorcycle-taxi from their home, then more than 78% of the  
50 population can reach the closest EmONC facility (as per the 2018 designation) in less than 1  
51 hour. When considering 2-hour maximum travel time, this percentage is much higher, with 95%  
52 of the population able to reach the nearest facility within the time limit. We also note that the  
53 motorcycle-taxi scenario covers much larger areas of the country (green areas in Figure 2) in  
54  
55  
56  
57  
58  
59  
60

1  
2  
3 comparison to the walking & motorized scenario. Nevertheless, this does not result in a  
4 substantial increase in population coverage. This is explained by the fact that many areas where  
5 access is very low in scenario 1 are fairly unpopulated.  
6  
7

8 For women who have no access to motorized means of transport, accessibility to  
9 EmONC within one hour drastically decreases to about 33% of the population, and to 51%  
10 within the 2-hour threshold travel time limit. Thus, nearly half of the target population does not  
11 have access to EmONC in the maximum acceptable travel time if they cannot afford to travel  
12 by motorized means of transport. As anticipated, access to EmONC is greater for urban  
13 populations, even with substantially decreased travel speeds, due to a higher density of both  
14 EmONC facilities and road networks in urban areas.  
15  
16  
17  
18  
19

20 Though the 2018 prioritized EmONC network included 36 fewer facilities than the 2013  
21 network, the 2018 network still achieves high overall geographic accessibility, with all regions  
22 obtaining estimated coverage percentage of 90% and more. It only drops marginally in terms  
23 of population coverage (between 1 and 3.6 percentage points depending on the scenario) when  
24 compared to the initial network of 109 designated EmONC facilities in 2013. However, from a  
25 planning perspective, prioritizing 73, rather than 109 facilities for EmONC functionality is a  
26 more feasible, achievable goal over the short term, i.e. the next MoH programmatic cycle (i.e.  
27 3-4 years). The number of prioritized EmONC facilities is lower than the international norm  
28 that targets around 80 functional EmONC facilities for the 2018 population of Togo. However,  
29 the decision of the MoH to target this prioritized network was commensurate with available  
30 resources and the modelling results showing that this network can nevertheless ensure timely  
31 access to a large proportion of the population in case of obstetrical complications.  
32  
33  
34  
35  
36  
37  
38  
39  
40

41 Our uncertainty analysis has shown that population coverage estimates are also most  
42 sensitive to uncertainties on the speeds on roads, as compared to the speeds off roads. This  
43 highlights the need for great caution when choosing travel speeds. A good representativeness  
44 of local experts, both in terms of knowledge about the specific travel behaviors of the target  
45 population and in terms of possible regional specificities for travel is vitally important. Other  
46 sources of information on effective travel speeds (e.g. using speed tracker onboard vehicles or  
47 mobile phones) could be very useful if available in the future. Furthermore, spatially displaying  
48 the uncertainty regarding travel times highlights the regions where this uncertainty is the  
49 highest, and that could be given high priority for future improvements of model  
50 parametrization. These improvements can be achieved by ensuring that all roads are well  
51 captured, or incorporating possible region-specific alternative means of transport.  
52  
53  
54  
55  
56  
57  
58  
59  
60

## Limitations

Although our study has produced the first high-resolution model of geographic accessibility to EmONC facilities in Togo, several limitations should be noted. First, our models only consider physical accessibility of the national network of EmONC health facilities. Although the three alternative transport models were created to acknowledge that motorized travel is not financially possible for some, there are additional financial barriers – such as formal and informal expenditures for health care – that our models do not address. Acceptability (i.e. "the match between how responsive health service providers are to the social and cultural expectations of individual users and communities", see Peters et al.[37]) was also not considered. Immediate availability of motorized transport was also assumed in our models, which could over-estimate accessibility in cases where delays for finding transport are significant. Variable quality of interpersonal and clinical care in facilities can also affect which facility patients chose; they may not choose the closest facility in terms of travel time[38], possibly bypassing BEmONC health facilities in certain cases. We also assumed no delay in the decision to seek care. Clearly, further research on how to incorporate these other facets of accessibility could improve our models and our understanding of the spatial variability of effective access to EmONC.

Second, the workshop participants decided to model travel during the dry season conditions. The extent of the degradation of road conditions could not be captured in certain parts of the countries during the wet season, and this is known to heavily affect travel time. A more balanced view of regional accessibility to EmONC could be achieved by factoring in these seasonal specificities.

Third, our analyses were built on a uniform uncertainty range ( $\pm 20\%$ ) on all roads and landcover categories. This could be improved by applying parameter-specific uncertainty ranges, notably on the different road types. This could be captured by a dedicated workshop with regional experts having a thorough knowledge of the road network, providing more realistic uncertainty ranges on motorized and walking speeds, possibly complemented by field observations or facility-based surveys. Lowering uncertainties on the travel scenario, and therefore on population coverage estimates, would improve decision making for prioritized resource allocation.

Finally, we analyze the coverage to the closest designated EmONC health facilities, which includes facilities that are actually functioning (as per our definition of functioning), as well as those that are not. The quarterly monitoring of the national network of EmONC health facilities in Togo started in 2015, and was included in the health management information



1  
2  
3 system (DHIS2) in 2020. This provides up-to-date information on the functionality of EmONC  
4 health facilities. The aim is to attain a network of functioning EmONC facilities, which is  
5 essential to help decrease maternal mortality/morbidity. Applying the same modeling approach  
6 described here to only functioning EmONC facilities would provide up-to-date population  
7 coverage indicators at national and subnational level that can inform decision makers regarding  
8 the remaining gaps in order to optimize resource allocation. This will be the subject of a  
9 forthcoming publication.  
10  
11  
12  
13  
14  
15  
16

## 17 CONCLUSION

18  
19 The physical accessibility mapping of the national network of EmONC health facilities  
20 in Togo proved to be very useful in understanding the potential of the revised network to  
21 provide quality EmONC services to a large proportion of the population, while pointing to those  
22 areas with less accessibility. Using realistic modelling based on travel times, the accessibility  
23 analyses provided key information to the 2018 EmONC prioritization exercise, which aimed at  
24 finding a balance between designating a smaller number of facilities as EmONC to channel  
25 needed resources to these priority sites for improving quality of care, and ensuring good  
26 coverage of the population within 1 hour of travel time to the closest designated EmONC health  
27 facility.  
28  
29  
30  
31  
32  
33

34 The application of this methodology in Togo can be replicated in other countries thanks  
35 to the current online availability of key high-resolution geospatial data sets. This is of particular  
36 importance where mapping of physical accessibility is a crucial component for bettering health  
37 outcomes for women and newborns.  
38  
39  
40  
41  
42  
43  
44

## 45 ACKNOWLEDGMENTS

46 We thank the Ministry of Health (*Ministère de la santé et de la protection sociale*) of  
47 Togo for their engagement in the implementation of the EmONC facility network in Togo,  
48 INSEED for help in data preparation, and UNFPA-Togo and UNFPA Maternal Health  
49 Thematic Fund for organizing the workshops. We are grateful to Michelle Schmitz and Orvalho  
50 Augusto for their careful review of an earlier version of the manuscript. The authors express  
51 their gratitude to all workshop attendees, whose active participation contributed to informing  
52 the accessibility models. The Averting Maternal Death and Disability (AMDD) Program at the  
53 Columbia University Mailman School of Public Health provided technical support; Marta  
54 Schaaf worked at AMDD at the time this work was undertaken.  
55  
56  
57  
58  
59  
60

## AUTHOR CONTRIBUTION

**Andrew Curtis:** conceptualization, methodology, formal analysis, writing, editing, visualization, validation. **Jean-Pierre Monet:** methodology, writing, editing, validation.

**Michel Brun:** methodology, writing, editing, validation, supervision. **Issa Abdou-Kérim**

**Bindaoudou:** data sharing, editing, validation. **Idrissou Daoudou:** data sharing, editing, validation. **Marta Schaaf:** methodology, writing, editing, validation. **Yawo Agbigbi:** data sharing, editing, validation. **Nicolas Ray:** conceptualization, methodology, writing, editing, validation, supervision.

## FUNDING

This work was partly funded by UNFPA/maternal and newborn health thematic fund (MHTF). Award/grant number: not applicable.

## COMPETING INTERESTS

None declared.

## PATIENT CONSENT FOR PUBLICATION

Not required.

## DATA AVAILABILITY STATEMENT

Data are available on reasonable request. Most data used in this study are openly accessible through the indicated data sources in the "Input geospatial data" section. Health facility names and geographic coordinates, as well as administrative boundaries are available on request to INSEED. Road data are available on request to the *Direction de la Cartographie nationale et du cadastre* of Togo. Data on barriers to movement are available on request to the the *Ministère de l'agriculture, de la production animale et halieutique* of Togo.

## References

1. Human Reproduction Program, World Health Organization. Strategies toward ending preventable maternal mortality (EPMM). Geneva, Switzerland; 2015. [accessed 08.10.2020]  
[https://apps.who.int/iris/bitstream/handle/10665/153544/9789241508483\\_eng.pdf;jsessionid=AB036F2DFE7A4ABBB00BE525D91915BD?sequence=1](https://apps.who.int/iris/bitstream/handle/10665/153544/9789241508483_eng.pdf;jsessionid=AB036F2DFE7A4ABBB00BE525D91915BD?sequence=1)

2. UNFPA. The Maternal and Newborn Health Thematic Fund Annual Report 2018 - Fund Annual Report 2018. 2019. [accessed 08.10.2020]  
[https://www.unfpa.org/sites/default/files/pub-pdf/013\\_MHTF\\_Annual\\_report\\_15-online.pdf](https://www.unfpa.org/sites/default/files/pub-pdf/013_MHTF_Annual_report_15-online.pdf)
3. Gabrysch S, Campbell OMR. Still too far to walk: Literature review of the determinants of delivery service use. *BMC Pregnancy Childbirth*. 2009;9:18. [accessed 05.04.2021] doi: 10.1186/1471-2393-9-34
4. Kyei-Nimakoh M, Carolan-Olah M, McCann TV. Access barriers to obstetric care at health facilities in sub-Saharan Africa-a systematic review. *Syst Rev*. 2017;6:16. [accessed 05.04.2021] doi: 10.1186/s13643-017-0503-x
5. World Health Organization, United Nations Population Fund, Mailman School of Public Health, et al. Monitoring emergency obstetric care : a handbook. Geneva: World Health Organization; 2009.
6. Ebener S, Guerra-Arias M, Campbell J, et al. The geography of maternal and newborn health: the state of the art. *International Journal of Health Geographics*. 2015;14:10. [accessed 05.04.2021] doi: 10.1186/s12942-015-0012-x
7. Noor AM, Gikandi PW, Hay SI, et al. Creating spatially defined databases for equitable health service planning in low-income countries: the example of Kenya. *Acta Trop*. 2004;91(3):239-251. [accessed 05.04.2021] doi: 10.1016/j.actatropica.2004.05.003
8. Macharia PM, Ouma PO, Gogo EG, et al. Spatial accessibility to basic public health services in South Sudan. *Geospatial Health*. 2017;12(1):106-113. [accessed 05.04.2021] doi: 10.4081/gh.2017.510
9. Donohoe J, Marshall V, Tan X, et al. Evaluating and comparing methods for measuring spatial access to mammography centers in Appalachia. *Health Serv Outcomes Res Methodol*. 2016;16(1-2):22-40. [accessed 05.04.2021] doi: 10.1007/s10742-016-0143-y
10. Neutens T. Accessibility, equity and health care: review and research directions for transport geographers. *J Transp Geogr*. 2015;43:14-27. [accessed 05.04.2021] doi: 10.1016/j.jtrangeo.2014.12.006
11. Ray N, Ebener S. AccessMod 3.0: computing geographic coverage and accessibility to health care services using anisotropic movement of patients. *International Journal of Health Geographics*. 2008;7:17. [accessed 05.04.2021] doi: 10.1186/1476-072x-7-63
12. Alegana VA, Wright JA, Pentrina U, et al. Spatial modelling of healthcare utilisation for treatment of fever in Namibia. *International Journal of Health Geographics*. 2012;11:13. [accessed 05.04.2021] doi: 10.1186/1476-072x-11-6
13. Aoun N, Matsuda H, Sekiyama M. Geographical accessibility to healthcare and malnutrition in Rwanda. *Soc Sci Med*. 2015;130:135-145. [accessed 05.04.2021] doi: 10.1016/j.socscimed.2015.02.004
14. Costa C, Santana P, Almendra R, et al. And when there is no information? The case of São tomé and Príncipe. International Conference on Sustainability Measurement and Modeling; 2009; Terrassa, Spain. [accessed 08.10.2020]  
[https://www.researchgate.net/publication/270507560\\_And\\_when\\_there\\_is\\_no\\_information\\_The\\_case\\_of\\_Sao\\_tome\\_and\\_Principe](https://www.researchgate.net/publication/270507560_And_when_there_is_no_information_The_case_of_Sao_tome_and_Principe)
15. Fisher RP, Myers BA. Free and simple GIS as appropriate for health mapping in a low resource setting: a case study in eastern Indonesia. *International Journal of Health Geographics*. 2011;10:11. [accessed 05.04.2021] doi: 10.1186/1476-072x-10-15
16. Munoz UH, Kallestal C. Geographical accessibility and spatial coverage modeling of the primary health care network in the Western Province of Rwanda. *International Journal of Health Geographics*. 2012;11:11. [accessed 05.04.2021] doi: 10.1186/1476-072x-11-40
17. Ouma PO, Maina J, Thurairana PN, et al. Access to emergency hospital care provided by the public sector in sub-Saharan Africa in 2015: a geocoded inventory and spatial

- analysis. *Lancet Glob Health*. 2018;6(3):E342-E350. [accessed 05.04.2021] doi: 10.1016/s2214-109x(17)30488-6
18. Juran S, Broer PN, Klug SJ, et al. Geospatial mapping of access to timely essential surgery in sub-Saharan Africa. *BMJ Glob Health*. 2018;3(4):10. [accessed 05.04.2021] doi: 10.1136/bmjgh-2018-000875
  19. Schmitz MM, Serbanescu F, Kamara V, et al. Did Saving Mothers, Giving Life Expand Timely Access to Lifesaving Care in Uganda? A Spatial District-Level Analysis of Travel Time to Emergency Obstetric and Newborn Care. *Global Health: Science and Practice*. 2019;7:S151-S167. [accessed 05.04.2021] doi: 10.9745/ghsp-d-18-00366
  20. Ebener S, Stenberg K, Brun M, et al. Proposing standardised geographical indicators of physical access to emergency obstetric and newborn care in low-income and middle-income countries. *BMJ Glob Health*. 2019;4:11. [accessed 05.04.2021] doi: 10.1136/bmjgh-2018-000778
  21. the World Bank. Togo - Data [Internet]. [accessed 08.07.2020]. Available from: <https://data.worldbank.org/country/TG>.
  22. Central Intelligence Agency. Africa - Togo - The World Factbook - Central Intelligence Agency [Internet]. [accessed 09.07.2020]. Available from: <https://www.cia.gov/library/publications/the-world-factbook/geos/to.html>.
  23. INSEED. MICS 6 Togo. Lomé, Togo; 2017. [accessed 08.10.2020] <https://washdata.org/report/togo-2017-mics-report-v2>
  24. Ministère de la Santé et de l'Hygiène publique. Plan National de Développement 2017-2022. Lomé, Togo; 2017. [accessed 08.10.2020] <http://extwprlegs1.fao.org/docs/pdf/Tog184007.pdf>
  25. Brun M, Monet, JP., Agbigbi, Y., Lysias, J., Moreira, I., Schaaf, M., Ray, N. Implementation manual for developing a national network of maternity units – Improving Emergency Obstetric and Newborn Care (EmONC). New York; in press. [accessed]
  26. Ray N, Ebener S MF. AccessMod 5 user manual - User manual (English) [Internet]. Geneva, Switzerland: University of Geneva; [accessed 08.10.2020]. Available from: <https://doc-accessmod.unepgrid.ch/display/EN/>.
  27. Nichols BE, Girdwood SJ, Crompton T, et al. Impact of a borderless sample transport network for scaling up viral load monitoring: results of a geospatial optimization model for Zambia. *J Int AIDS Soc*. 2018;21(12):9. [accessed 05.04.2021] doi: 10.1002/jia2.25206
  28. Département des transports du développement urbain et des TIC. Le secteur du transport au Togo - Bref aperçu. Groupe de la Banque Africaine de Développement; 2014 [accessed 08.10.2020] [https://www.afdb.org/fileadmin/uploads/afdb/Documents/Publications/AfDB\\_-\\_Togo\\_-\\_Note\\_sur\\_le\\_secteur\\_du\\_transport.pdf](https://www.afdb.org/fileadmin/uploads/afdb/Documents/Publications/AfDB_-_Togo_-_Note_sur_le_secteur_du_transport.pdf)
  29. Center for International Earth Science Information Network - CIESIN - Columbia University, International Food Policy Research Institute - IFPRI, The World Bank, et al. Global Rural-Urban Mapping Project, Version 1 (GRUMPv1): Urban Extent Polygons, Revision 01 [Internet]. NASA Socioeconomic Data and Applications Center (SEDAC). 2017 [accessed 09.07.2020]. Available from: <https://doi.org/10.7927/H4Z31WKF>.
  30. Stewart BT, Tansley G, Gyedu A, et al. Mapping Population-Level Spatial Access to Essential Surgical Care in Ghana Using Availability of Bellwether Procedures. *Jama Surgery*. 2016;151(8). [accessed 05.04.2021] doi: 10.1001/jamasurg.2016.1239
  31. Ministère de l'agriculture, de la production animale et halieutique. Barriers to movement. Lomé, Togo; 2016.
  32. Direction de la Cartographie nationale et du cadastre. Road network of Togo. Lomé, Togo; 2016.

- 1  
2  
3 33. Jarvis A, Reuter H, Nelson A, et al. Hole-filled SRTM for the globe version 3, from the  
4 CGIAR-CSI SRTM 90m database [Internet]. 2008 [accessed 08.10.2020]. Available  
5 from: <http://srtm.csi.cgiar.org>.  
6  
7 34. Worldpop, CIESIN. The spatial distribution of population with country total adjusted to  
8 match the corresponding UNPD estimate - Togo [Internet]. 2013 [accessed 08.10.2020].  
9 Available from:  
10 [ftp://ftp.worldpop.org.uk/GIS/Population/Global\\_2000\\_2020/2019/TGO/tgo\\_ppp\\_2019\\_](ftp://ftp.worldpop.org.uk/GIS/Population/Global_2000_2020/2019/TGO/tgo_ppp_2019_)  
11 <UNadj.tif>.  
12  
13 35. Brun M, Agbigbi Y, Bindaoudou K, et al. Priorisation et cartes des soins obstétricaux et  
14 néonataux d'urgence au Togo. Lomé, Togo; 2020. [accessed]  
15  
16 36. INSEED. Administrative boundaries. Lomé, Togo; 2016.  
17  
18 37. Peters DH, Garg A, Bloom G, et al. Poverty and access to health care in developing  
19 countries. *AnnNY AcadSci*. 2008;1136:161-171. [accessed 05.04.2021] doi:  
20 10.1196/annals.1425.011  
21  
22 38. Kruk ME, Gage AD, Arsenault C, et al. High-quality health systems in the Sustainable  
23 Development Goals era: time for a revolution. *Lancet Glob Health*. 2018;6(11):E1196-  
24 E1252. [accessed 05.04.2021] doi: 10.1016/s2214-109x(18)30386-3  
25  
26  
27  
28  
29  
30  
31  
32  
33  
34  
35  
36  
37  
38  
39  
40  
41  
42  
43  
44  
45  
46  
47  
48  
49  
50  
51  
52  
53  
54  
55  
56  
57  
58  
59  
60

## Figure legends

**Figure 1** - Vector and raster data sets used. (A) Barriers to movement (rivers, waterbodies, lakes); (B) Road network; (C) Digital Elevation Model (DEM); (D) 2013 Population density raster; (E) 2018 Population density raster; (F) Landcover raster; (G) 2013 EmONC facilities; (H) 2018 EmONC facilities; (I) Administrative boundaries (prefectures, regions and Global Rural-Urban Mapping Project (GRUMP) urban extents) with region names.

**Figure 2** - Maps of the travel time to the nearest EmONC facility using either the walking & motorized scenario, the motorcycle-taxi scenario and the walking-only scenario, for both time periods (2013 and 2018).

**Figure 3** - Uncertainty maps of the travel times to the nearest facility for the walking & motorized scenario on the 2018 EmONC facility network using (A) Road uncertainty, (B) Landcover (off-road) uncertainty, and (C) Total uncertainty.

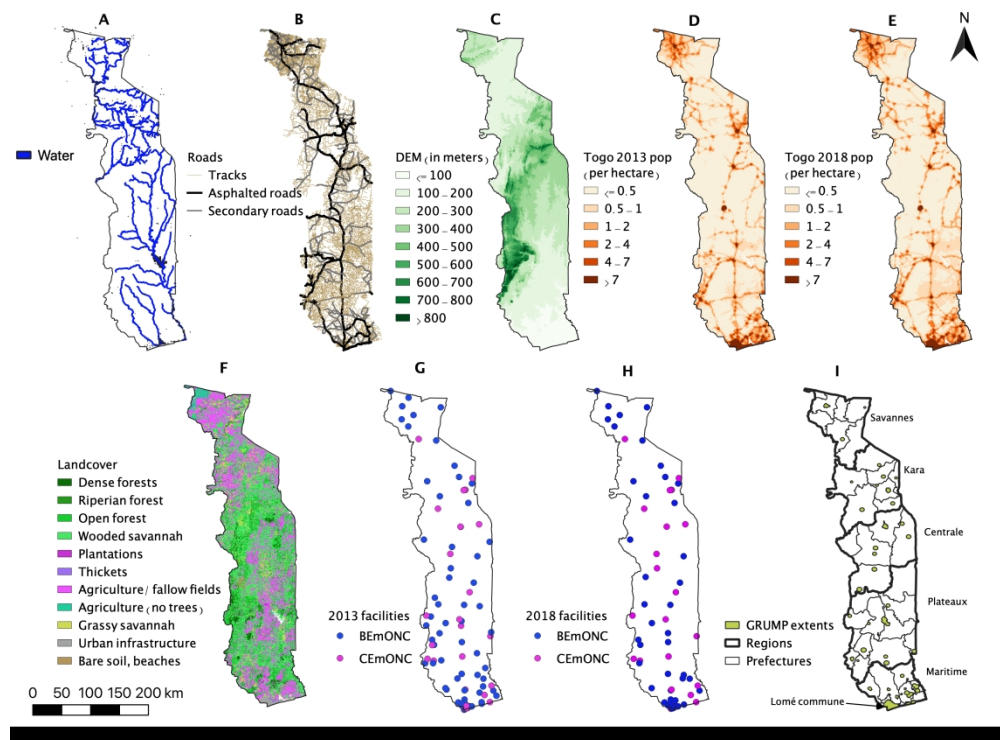

Figure 1 - Vector and raster data sets used. (A) Barriers to movement (rivers, waterbodies, lakes); (B) Road network; (C) Digital Elevation Model (DEM); (D) 2013 Population density raster; (E) 2018 Population density raster; (F) Landcover raster; (G) 2013 EmONC facilities; (H) 2018 EmONC facilities; (I) Administrative boundaries (prefectures, regions and Global Rural-Urban Mapping Project (GRUMP) urban extents) with region names.

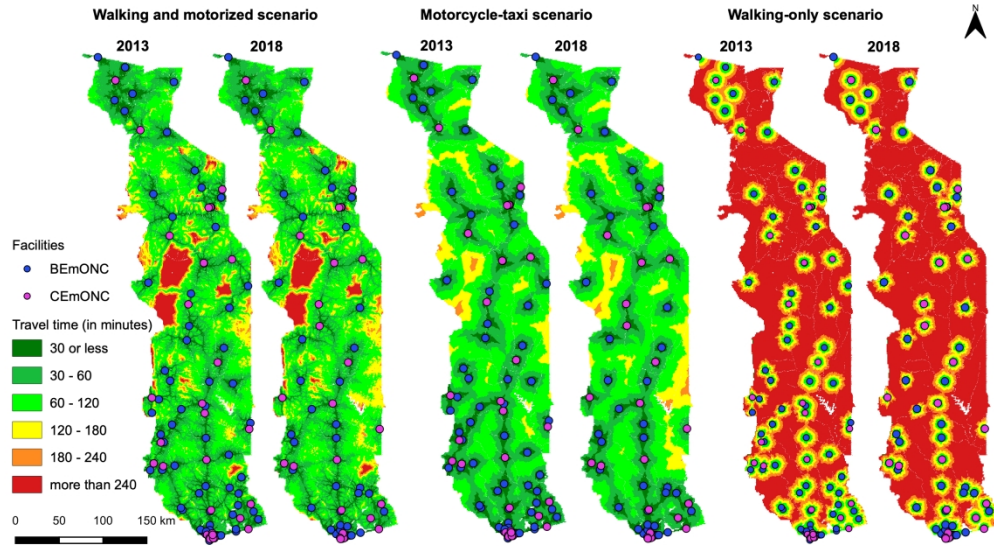

Figure 2 - Maps of the travel time to the nearest EmONC facility using either the walking & motorized scenario, the motorcycle-taxi scenario and the walking-only scenario, for both time periods (2013 and 2018).





Figure 3 - Uncertainty maps of the travel times to the nearest facility for the walking & motorized scenario on the 2018 EmONC facility network using (A) Road uncertainty, (B) Landcover (off-road) uncertainty, and (C) Total uncertainty.

## SUPPLEMENTARY MATERIAL

## Supplement 1: travel scenario tables

## Walking &amp; Motorized scenario

| Class | Label                                               | Label (English)                                               | Speed (km/h) | Mode      |
|-------|-----------------------------------------------------|---------------------------------------------------------------|--------------|-----------|
| 11    | Forets denses                                       | Dense forest                                                  | 1.5          | WALKING   |
| 12    | Forets riveraines                                   | Riparian forest                                               | 1.5          | WALKING   |
| 13    | Forets claires,<br>savanes boisées                  | Open forest,<br>wooded savannah                               | 1.5          | WALKING   |
| 14    | Savane arborée,<br>arbustive                        | Sparsely wooded<br>savannah                                   | 1.5          | WALKING   |
| 16    | Plantations                                         | Plantations                                                   | 3            | WALKING   |
| 17    | Fourrées                                            | Thickets                                                      | 3            | WALKING   |
| 21    | Cultures et<br>Jachères                             | Cultivated and<br>fallow lands                                | 3            | WALKING   |
| 22    | Cultures sans<br>arbres                             | Cultivated lands<br>without trees                             | 3            | WALKING   |
| 32    | Savanes herbeuses                                   | Grassy savannah                                               | 3            | WALKING   |
| 41    | Agglomérations et<br>infra, plantations<br>urbaines | Agglomerations<br>and<br>infrastructure,<br>urban plantations | 3            | WALKING   |
| 61    | Sols nus, roches,<br>carrières, plage               | Open soil, rocky<br>terrain, quarries,<br>beach               | 3            | WALKING   |
| 1000  | Pistes rurales                                      | Rural tracks                                                  | 15           | MOTORIZED |
| 1002  | Routes bitumées<br>rurales                          | Primary rural<br>asphalted roads                              | 80           | MOTORIZED |
| 1003  | Routes secondaires<br>rurales                       | Secondary rural<br>roads                                      | 40           | MOTORIZED |
| 1004  | Pistes urbaines                                     | Urban tracks                                                  | 10           | MOTORIZED |
| 1005  | Routes bitumées<br>urbaines                         | Primary urban<br>asphalted roads                              | 30           | MOTORIZED |
| 1006  | Routes secondaires<br>urbaines                      | Secondary urban<br>roads                                      | 20           | MOTORIZED |

## Motorcycle-taxi scenario

| class | label                              | Label (English)                 | Speed (km/h) | mode      |
|-------|------------------------------------|---------------------------------|--------------|-----------|
| 11    | Forets denses                      | Dense forest                    | 8            | MOTORIZED |
| 12    | Forets riveraines                  | Riparian forest                 | 8            | MOTORIZED |
| 13    | Forets claires,<br>savanes boisées | Open forest,<br>wooded savannah | 8            | MOTORIZED |
| 14    | Savane arborée,<br>arbustive       | Sparsely wooded<br>savannah     | 8            | MOTORIZED |
| 16    | Plantations                        | Plantations                     | 10           | MOTORIZED |
| 17    | Fourrées                           | Thickets                        | 8            | MOTORIZED |

|      |                                               |                                                      |    |           |
|------|-----------------------------------------------|------------------------------------------------------|----|-----------|
| 21   | Cultures et Jachères                          | Cultivated and fallow lands                          | 10 | MOTORIZED |
| 22   | Cultures sans arbres                          | Cultivated lands without trees                       | 10 | MOTORIZED |
| 32   | Savanes herbeuses                             | Grassy savannah                                      | 12 | MOTORIZED |
| 41   | Agglomérations et infra, plantations urbaines | Agglomerations and infrastructure, urban plantations | 7  | MOTORIZED |
| 61   | Sols nus, roches, carrières, plage            | Open soil, rocky terrain, quarries, beach            | 7  | MOTORIZED |
| 1000 | Pistes                                        | Rural tracks                                         | 15 | MOTORIZED |
| 1002 | Routes bitumées                               | Primary rural asphalted roads                        | 40 | MOTORIZED |
| 1003 | Routes secondaires                            | Secondary rural roads                                | 20 | MOTORIZED |
| 1004 | Pistes urbaines                               | Urban tracks                                         | 10 | MOTORIZED |
| 1005 | Routes bitumées urbaines                      | Primary urban asphalted roads                        | 30 | MOTORIZED |
| 1006 | Routes secondaires urbaines                   | Secondary urban roads                                | 15 | MOTORIZED |

### Walking scenario

| class | label                                         | Label (English)                                      | Speed (km/h) | mode    |
|-------|-----------------------------------------------|------------------------------------------------------|--------------|---------|
| 11    | Forets denses                                 | Dense forest                                         | 1.5          | WALKING |
| 12    | Forets riveraines                             | Riparian forest                                      | 1.5          | WALKING |
| 13    | Forets claires, savanes boisées               | Open forest, wooded savannah                         | 1.5          | WALKING |
| 14    | Savane arborée, arbustive                     | Sparsely wooded savannah                             | 1.5          | WALKING |
| 16    | Plantations                                   | Plantations                                          | 3            | WALKING |
| 17    | Fourrées                                      | Thickets                                             | 3            | WALKING |
| 21    | Cultures et Jachères                          | Cultivated and fallow lands                          | 3            | WALKING |
| 22    | Cultures sans arbres                          | Cultivated lands without trees                       | 3            | WALKING |
| 32    | Savanes herbeuses                             | Grassy savannah                                      | 3            | WALKING |
| 41    | Agglomérations et infra, plantations urbaines | Agglomerations and infrastructure, urban plantations | 3            | WALKING |
| 61    | Sols nus, roches, carrières, plage            | Open soil, rocky terrain, quarries, beache           | 3            | WALKING |
| 1000  | Pistes                                        | Rural tracks                                         | 4            | WALKING |
| 1002  | Routes bitumées                               | Primary rural asphalted roads                        | 4            | WALKING |

|      |                             |                               |   |         |
|------|-----------------------------|-------------------------------|---|---------|
| 1003 | Routes secondaires          | Secondary rural roads         | 4 | WALKING |
| 1004 | Pistes urbaines             | Urban tracks                  | 4 | WALKING |
| 1005 | Routes bitumées urbaines    | Primary urban asphalted roads | 4 | WALKING |
| 1006 | Routes secondaires urbaines | Secondary urban roads         | 4 | WALKING |

For peer review only

## Supplement 2: Preparation of input geospatial data

All following geospatial data sets were prepared using QGIS ver. 3.2.0. After finalization, each of them was changed to raster format (if needed) at 100m resolution, and projected in the WGS84 Universal Transverse Mercator (zone 31N) coordinate reference system.

### Road network (vector)

We used the road network created by the *Direction de la Cartographie nationale et du cadastre* of Togo. In 2015, GIS experts from the national Togolese Institute for Statistics, Economic and Demographic studies (INSEED), in collaboration with technicians from the National Ministry of Public Works and Transportation, re-categorized this road data set into three hierarchical categories: asphalted roads, secondary roads, and tracks (see figure 1B).

### Barriers to movement (vector)

Water bodies were considered as barriers to terrestrial movements, unless a road segment crosses over, which is assumed to be a bridge. Rivers were recoded into two categories by the INSEED GIS experts, distinguishing permanent and seasonal rivers. We used both categories as barriers to movement in our accessibility models, reflecting our conservative approach of considering a maximum of potential barriers.

### Land cover (raster)

The land cover data set at 100m resolution was provided by INSEED. We assumed that different land cover categories can influence travel speed (e.g., travel is slower in a dense forest than in an open area), each of these land cover categories can be given a distinct travel speed in the travel scenario. The landcover category representing bodies of water was extracted from the landcover and used as an additional barrier to movement. Using the "Merge land cover" tool in AccessMod, the land cover raster was merged with the road network and the various barriers to movement, in order to obtain the final "merged land cover" on which travel models are applied. For the merging process, roads were stacked above the barriers, so that any existing road passing over a barrier was considered passable.

### Population density (raster)

Population densities were derived from the Worldpop data set[1]. This data set is at 3-arc second resolution (90m at the equator) and is appropriate for our analyses as the modelling technique to obtain it uses a detailed settlement mapping and links these settlements with gazetteer population numbers, considering that the vast majority of people live within a settlement. The remaining unaccounted-for population is then distributed using a weighted landcover grid in function of the probability of being populated, and the total population estimates are adjusted to UN estimates[2]. We used the UN-adjusted 2013 and 2018 Worldpop data sets for Togo. The data set was aggregated to 100m resolution.

A final correction step consisted in correcting for the population falling in pixels that were assigned a barrier status in the merged landcover data set, because this population is not considered by the accessibility analysis and is left unaccounted for. To correct for that, we extracted the population in each barrier pixel and dispatched it uniformly within the surface of the prefecture area the pixel belongs to. This way the population in each prefecture was correctly represented, even if a large number of barrier pixels are found. This step was done in AccessMod using the « Adjust population distribution» module.

**Supplement 3: Table of percentage of population living within 2-hour travel time to the nearest EmONC facility, per prefecture, with uncertainty intervals within brackets, and for the walking & motorized and the motorcycle-taxi scenarios**

| Prefectures  | Walking & Motorized Scenario |                    | Motorized only Scenario |                    | Walking only Scenario |                    |
|--------------|------------------------------|--------------------|-------------------------|--------------------|-----------------------|--------------------|
|              | 1-hour                       | 2-hour             | 1-hour                  | 2-hour             | 1-hour                | 2-hour             |
| Agoenyive    | 100 [99.6 - 100]             | 100 [100 - 100]    | 100 [100 - 100]         | 100 [100 - 100]    | 68.4 [53.2 - 80.3]    | 99.6 [95.5 - 99.9] |
| Agou         | 73.4 [59.9 - 83.5]           | 99.7 [96.3 - 99.9] | 69.3 [57.8 - 78.7]      | 99.9 [94.4 - 100]  | 13.0 [9.9 - 15.9]     | 27.9 [21.9 - 34.1] |
| Akebou       | 46.7 [31.7 - 61.5]           | 93.4 [84.3 - 96.3] | 42.9 [23.7 - 55.9]      | 92.3 [75.3 - 100]  | 0.9 [0.6 - 1.4]       | 4.8 [2.7 - 6.9]    |
| Amou         | 67.3 [55.3 - 76.3]           | 92.2 [86.5 - 95.4] | 74.4 [64.9 - 83.5]      | 99.3 [94.4 - 100]  | 8.8 [6 - 12.2]        | 26.9 [19.6 - 34.4] |
| Anie         | 41.5 [35.5 - 48.0]           | 74.0 [61.2 - 88.3] | 41.6 [37.2 - 44.7]      | 61.6 [52.3 - 71.3] | 15.4 [11.8 - 18.6]    | 27.8 [23.9 - 31.5] |
| Assoli       | 56.5 [41.2 - 67.3]           | 90.5 [82.2 - 94.7] | 77.7 [65.1 - 85.3]      | 99.6 [95.5 - 100]  | 9.8 [6.6 - 13.2]      | 25.5 [19.8 - 31.2] |
| Ave          | 76.3 [66.8 - 82.5]           | 94.8 [89.9 - 97.3] | 85.2 [75.6 - 93.3]      | 100 [99.9 - 100]   | 17.5 [12.8 - 21.6]    | 37.8 [29.4 - 45.4] |
| Bas-Mono     | 88.3 [82.2 - 92.0]           | 98.6 [96.4 - 99.4] | 98.9 [94.9 - 99.6]      | 99.6 [99.6 - 99.6] | 45.3 [33.9 - 54.2]    | 78.8 [68.0 - 86.3] |
| Bassar       | 57.5 [46.9 - 67.1]           | 87.2 [80.4 - 90.8] | 64.5 [54.2 - 71.7]      | 92.8 [84.4 - 97.0] | 12.5 [9.0 - 15.8]     | 24.3 [20.1 - 28.9] |
| Binah        | 85.9 [77.3 - 91.6]           | 97.9 [96.6 - 98.6] | 85.4 [77.7 - 90.5]      | 100 [97.3 - 100]   | 28 [20.6 - 36.6]      | 61.1 [53.2 - 66.8] |
| Blitta       | 81.4 [72.7 - 87.5]           | 97.1 [94.4 - 98.2] | 84.3 [78.8 - 89.8]      | 98.3 [95.0 - 99.9] | 31.7 [21.6 - 41.8]    | 64.1 [57.2 - 66.3] |
| Cinkasse     | 99.3 [93.5 - 99.6]           | 99.9 [99.9 - 99.9] | 94.5 [67.9 - 100]       | 100 [100 - 100]    | 10.7 [9.1 - 12.2]     | 18.1 [15.2 - 21.6] |
| Dankpen      | 48.3 [37.2 - 57.4]           | 83.3 [71.7 - 90.5] | 42.2 [32.7 - 52.0]      | 83.3 [69.1 - 93.4] | 9.8 [7.6 - 11.5]      | 16.8 [14.2 - 19.8] |
| Danyi        | 76.8 [64.9 - 85.9]           | 98.1 [94.8 - 99.2] | 92.5 [81.1 - 97.2]      | 100 [100 - 100]    | 8.8 [6.6 - 11.3]      | 23.5 [16.9 - 32.0] |
| Doufelgou    | 53.3 [44.3 - 61.8]           | 88.0 [77.7 - 93.0] | 62.4 [51.1 - 71.3]      | 95.6 [84.4 - 99.8] | 12.2 [8.6 - 15.3]     | 28.6 [21.8 - 35.4] |
| Est-Mono     | 37.3 [26.9 - 45.4]           | 75.0 [62.8 - 86.6] | 38.9 [28.0 - 46.8]      | 78.5 [61.6 - 94.1] | 5.1 [3.7 - 6.3]       | 12.2 [8.9 - 16.2]  |
| Golfe        | 100 [99.5 - 100]             | 100 [100 - 100]    | 100 [100 - 100]         | 100 [100 - 100]    | 67.1 [52.5 - 80]      | 99.9 [97.1 - 100]  |
| Haho         | 50.0 [38.0 - 61.4]           | 89.7 [78.8 - 94.9] | 49.7 [41.0 - 58.4]      | 85.1 [74.0 - 94.0] | 11.4 [8.8 - 13.3]     | 20.4 [16.9 - 24.3] |
| Keran        | 42.0 [29.5 - 54.9]           | 87.8 [74.9 - 93.3] | 34.4 [26.3 - 42.7]      | 86.0 [64.7 - 97.7] | 4.3 [3.0 - 5.7]       | 12.6 [9.3 - 15.3]  |
| Kloto        | 85.5 [76.7 - 91.9]           | 99.4 [98.0 - 99.7] | 97.2 [90.5 - 99.8]      | 100 [100 - 100]    | 22.7 [18.3 - 27]      | 40.7 [34.7 - 45.6] |
| Kozah        | 85.2 [76.6 - 90.3]           | 97.1 [95.1 - 98.1] | 92.9 [87.6 - 95.9]      | 100 [99.8 - 100]   | 22.1 [17.6 - 26.3]    | 42.3 [33.8 - 50.8] |
| Kpele        | 71.8 [62.3 - 80.1]           | 98.2 [91.3 - 99.7] | 78.4 [71.8 - 84.3]      | 99.6 [94.2 - 100]  | 16.8 [12.2 - 20.2]    | 29.6 [25.3 - 34.3] |
| Kpendjal     | 64.2 [47.9 - 76.5]           | 98.7 [92.9 - 99.8] | 59.7 [38.6 - 74.8]      | 99.5 [92.8 - 100]  | 3.7 [2.7 - 4.7]       | 10.3 [7.0 - 13.6]  |
| Lacs         | 94.9 [91.1 - 97.1]           | 99.7 [99.0 - 100]  | 95.4 [91.5 - 97.8]      | 100 [99.9 - 100]   | 22.2 [15.9 - 28.8]    | 51.8 [40.1 - 64.2] |
| Lomé Commune | 100 [100 - 100]              | 100 [100 - 100]    | 100 [100 - 100]         | 100 [100 - 100]    | 100 [93.9 - 100]      | 100 [100 - 100]    |
| Moyen-Mono   | 39.6 [25.9 - 50.9]           | 94.0 [79.8 - 98.2] | 42.6 [34.4 - 50.6]      | 90.7 [66.3 - 99.3] | 3.4 [2.2 - 4.5]       | 12.6 [7.8 - 19.2]  |
| Naki-Ouest   | 77.5 [60.5 - 89.8]           | 99.7 [98.5 - 100]  | 64.3 [49.3 - 77.9]      | 100 [97.8 - 100]   | 11.4 [8 - 15.2]       | 26.3 [21.6 - 30.8] |
| Ogou         | 54.9 [44.2 - 66.3]           | 95.9 [85.7 - 99.2] | 54.9 [46.7 - 62.9]      | 93.2 [79.1 - 99.9] | 10.1 [7.4 - 13]       | 26.0 [19.5 - 30.9] |
| Oti          | 79.3 [68.4 - 86.2]           | 97.7 [93.5 - 98.8] | 78.4 [67.6 - 86.4]      | 98.0 [96.1 - 99.4] | 20.6 [15.5 - 24.7]    | 37.1 [30.7 - 44.7] |
| Oti-Sud      | 47.8 [33.5 - 58.5]           | 95.3 [83.1 - 98.6] | 36.7 [23.6 - 49.8]      | 87.4 [69.7 - 99.4] | 5.5 [3.7 - 6.7]       | 11.5 [8.9 - 13.6]  |
| Plaine de Mo | 33.8 [21.1 - 45.9]           | 72.8 [62.8 - 78.8] | 37.3 [24.0 - 52.7]      | 87.3 [75.7 - 94.1] | 1.7 [1.1 - 2.5]       | 7.3 [4.5 - 11.2]   |
| Sotouboua    | 42.4 [31.5 - 52.7]           | 75.2 [67.8 - 77.9] | 49.9 [40.1 - 57.8]      | 82.2 [70.4 - 89.6] | 3.9 [2.9 - 4.9]       | 9.0 [6.9 - 11.6]   |
| Tandjoare    | 85.6 [76.7 - 91.2]           | 99.8 [98.3 - 100]  | 76.2 [65.5 - 84.7]      | 98.6 [92.9 - 100]  | 8.8 [6.3 - 11.7]      | 27.5 [18.9 - 37.0] |
| Tchamba      | 54.9 [37.3 - 67.9]           | 90.2 [83.7 - 93.4] | 45.9 [33.4 - 60.9]      | 96.5 [88.8 - 99.2] | 8.2 [6.4 - 9.9]       | 15.7 [12.9 - 18.3] |
| Tchaoudjo    | 65.0 [53.3 - 74.8]           | 93.4 [88.0 - 95.7] | 71.8 [57.6 - 80.1]      | 98.5 [92.4 - 99.5] | 16.7 [11.7 - 21.2]    | 30.4 [26.5 - 34.8] |
| Tone         | 91.8 [80.5 - 97.4]           | 100 [99.9 - 100]   | 82.4 [71.9 - 89.2]      | 99.9 [98.5 - 100]  | 13.9 [10.1 - 17.3]    | 28.1 [22.7 - 34.6] |

|                |                           |                           |                           |                           |                           |                           |
|----------------|---------------------------|---------------------------|---------------------------|---------------------------|---------------------------|---------------------------|
| Vo             | 85.6 [70.3 - 93.2]        | 99.4 [98.3 - 99.8]        | 95.5 [83.9 - 99.5]        | 100 [100 - 100]           | 10.9 [7.0 - 15.4]         | 31.6 [23.3 - 43.4]        |
| Wawa           | 51.6 [36.0 - 65.0]        | 93.0 [83.2 - 96.8]        | 67.7 [45.3 - 82.3]        | 100 [97.5 - 100]          | 2.7 [2.1 - 3.4]           | 6.5 [4.8 - 8.6]           |
| Yoto           | 82.2 [71.7 - 88.2]        | 95.9 [93.3 - 97.5]        | 87.0 [78.9 - 92]          | 98.9 [97.2 - 99.6]        | 24.3 [18.0 - 29.0]        | 46.1 [37.8 - 55.4]        |
| Zio            | 87.9 [77.4 - 93.9]        | 99.7 [98.5 - 99.9]        | 93.1 [85.3 - 96.4]        | 100 [99.5 - 100]          | 16.4 [11.9 - 21.2]        | 39.5 [29.4 - 49.7]        |
| <b>Country</b> | <b>78.3 [70.5 - 84.0]</b> | <b>95.5 [91.6 - 97.5]</b> | <b>79.2 [72.2 - 84.3]</b> | <b>96.0 [91.6 - 98.4]</b> | <b>33.4 [27.1 - 38.4]</b> | <b>50.8 [46.0 - 55.0]</b> |

For peer review only

## Supplement 4: Effects of considering slopes to correct for walking speeds

When walking is used in a travel scenario, AccessMod computes the slope between adjacent raster cells using the Digital Elevation Model. Walking speeds are then corrected using the slope value, following the Tobler (1993) formula[3]:

$$V = V_F * e^{-3.5*|S+0.05|},$$

where  $V$  is the corrected walking speed in kilometers per hour (Km/h),  $V_F$  is the walking speed on a flat surface (given by the user-defined travel scenario), and  $S$  is the slope in hundredth of percent.

These corrections applied when walking off-road in the "Walking & Motorized scenario", and everywhere in the "Walking scenario". In the table below, each cell is composed of two results. The first figure takes slope correction into consideration, while the second figure does not take into account the slope correction.

|                         | Walking & Motorized Scenario |               |               |               | Walking Scenario |               |               |               |
|-------------------------|------------------------------|---------------|---------------|---------------|------------------|---------------|---------------|---------------|
|                         | 2013                         |               | 2018          |               | 2013             |               | 2018          |               |
| <i>Regions</i>          | <i>1-hour</i>                | <i>2-hour</i> | <i>1-hour</i> | <i>2-hour</i> | <i>1-hour</i>    | <i>2-hour</i> | <i>1-hour</i> | <i>2-hour</i> |
| <b>Plateaux</b>         | 66.2/67.7                    | 95.1/95.6     | 55.4/56.6     | 89.8/90.3     | 15.5/16.2        | 30.2/31.4     | 10.9/11.4     | 22.6/23.5     |
| <b>Kara</b>             | 63.3/64.3                    | 90.4/90.9     | 62.7/63.6     | 90.2/90.7     | 14.5/15.0        | 29.7/30.2     | 14.5/14.9     | 29.3/29.8     |
| <b>Maritime</b>         | 94.7/94.8                    | 99.5/99.5     | 94.4/94.5     | 99.4/99.4     | 47.9/48.2        | 74.8/75.1     | 47.7/48.0     | 76.4/76.5     |
| <b>Centrale</b>         | 70.2/70.6                    | 92.3/92.6     | 65.2/65.6     | 91.7/91.9     | 22.0/22.3        | 41.3/41.5     | 18.1/18.5     | 35.7/35.9     |
| <b>Savanes</b>          | 81.7/81.9                    | 98.9/99.0     | 80.7/80.9     | 98.9/99.0     | 12.1/12.4        | 26.5/27.2     | 11.4/11.6     | 24.2/24.9     |
| <b>Lomé<br/>Commune</b> | 100/100                      | 100/100       | 100/100       | 100/100       | 100/100          | 100/100       | 100/100       | 100/100       |
| <b>Country</b>          | 81.0/81.5                    | 96.7/98.0     | 78.3/78.8     | 95.5/95.7     | 34.7/35.1        | 52.3/52.8     | 33.4/33.7     | 50.8/51.2     |



## Supplementary References

1. Worldpop, CIESIN. The spatial distribution of population with country total adjusted to match the corresponding UNPD estimate - Togo [Internet]. 2013 [accessed 08.10.2020]. Available from:  
[ftp://ftp.worldpop.org.uk/GIS/Population/Global\\_2000\\_2020/2019/TGO/tgo\\_ppp\\_2019\\_U\\_Nadj.tif](ftp://ftp.worldpop.org.uk/GIS/Population/Global_2000_2020/2019/TGO/tgo_ppp_2019_U_Nadj.tif).
2. Linard C, Gilbert M, Snow RW, et al. Population Distribution, Settlement Patterns and Accessibility across Africa in 2010. *PLoS One*. 2012;7(2):8. doi: 10.1371/journal.pone.0031743
3. Tobler W. Three Presentations on Geographical Analysis and Modeling: Non-Isotropic Geographic Modeling; Speculations on the Geometry of Geography; and Global Spatial Analysis. UC Santa Barbara: National Center for Geographic Information and Analysis. ; 1993. [accessed 08.10.2020] <https://escholarship.org/uc/item/05r820mz>

# BMJ Open

## National optimization of accessibility to emergency obstetric and neonatal care in Togo: a geospatial analysis

|                                 |                                                                                                                                                                                                                                                                                                                                                                                                                                                                                                                                                                                                                             |
|---------------------------------|-----------------------------------------------------------------------------------------------------------------------------------------------------------------------------------------------------------------------------------------------------------------------------------------------------------------------------------------------------------------------------------------------------------------------------------------------------------------------------------------------------------------------------------------------------------------------------------------------------------------------------|
| Journal:                        | <i>BMJ Open</i>                                                                                                                                                                                                                                                                                                                                                                                                                                                                                                                                                                                                             |
| Manuscript ID                   | bmjopen-2020-045891.R2                                                                                                                                                                                                                                                                                                                                                                                                                                                                                                                                                                                                      |
| Article Type:                   | Original research                                                                                                                                                                                                                                                                                                                                                                                                                                                                                                                                                                                                           |
| Date Submitted by the Author:   | 24-Jun-2021                                                                                                                                                                                                                                                                                                                                                                                                                                                                                                                                                                                                                 |
| Complete List of Authors:       | Curtis, Andrew; University of Geneva Institute of Global Health, GeoHealth group; Universite de Geneve Institut des Sciences de l'Environnement<br>Monet, Jean-Pierre; UNFPA, Technical Division<br>Brun, Michel; UNFPA, Technical Division<br>Bindaoudou, Issa Abdou-Kérim; National Institute of Statistics and Economic and Demographic Studies<br>Daoudou, Idrissou; Ministry of Health of Togo<br>Schaaf, Marta; Independent Consultant,<br>Agbigbi, Yawo; UNFPA-Togo<br>Ray, Nicolas; University of Geneva Institute of Global Health, GeoHealth group; Universite de Geneve Institut des Sciences de l'Environnement |
| <b>Primary Subject Heading</b>: | Public health                                                                                                                                                                                                                                                                                                                                                                                                                                                                                                                                                                                                               |
| Secondary Subject Heading:      | Obstetrics and gynaecology                                                                                                                                                                                                                                                                                                                                                                                                                                                                                                                                                                                                  |
| Keywords:                       | PUBLIC HEALTH, Maternal medicine < OBSTETRICS, Organisation of health services < HEALTH SERVICES ADMINISTRATION & MANAGEMENT                                                                                                                                                                                                                                                                                                                                                                                                                                                                                                |
|                                 |                                                                                                                                                                                                                                                                                                                                                                                                                                                                                                                                                                                                                             |

SCHOLARONE™  
Manuscripts



I, the Submitting Author has the right to grant and does grant on behalf of all authors of the Work (as defined in the below author licence), an exclusive licence and/or a non-exclusive licence for contributions from authors who are: i) UK Crown employees; ii) where BMJ has agreed a CC-BY licence shall apply, and/or iii) in accordance with the terms applicable for US Federal Government officers or employees acting as part of their official duties; on a worldwide, perpetual, irrevocable, royalty-free basis to BMJ Publishing Group Ltd ("BMJ") its licensees and where the relevant Journal is co-owned by BMJ to the co-owners of the Journal, to publish the Work in this journal and any other BMJ products and to exploit all rights, as set out in our [licence](#).

The Submitting Author accepts and understands that any supply made under these terms is made by BMJ to the Submitting Author unless you are acting as an employee on behalf of your employer or a postgraduate student of an affiliated institution which is paying any applicable article publishing charge ("APC") for Open Access articles. Where the Submitting Author wishes to make the Work available on an Open Access basis (and intends to pay the relevant APC), the terms of reuse of such Open Access shall be governed by a Creative Commons licence – details of these licences and which [Creative Commons](#) licence will apply to this Work are set out in our licence referred to above.

Other than as permitted in any relevant BMJ Author's Self Archiving Policies, I confirm this Work has not been accepted for publication elsewhere, is not being considered for publication elsewhere and does not duplicate material already published. I confirm all authors consent to publication of this Work and authorise the granting of this licence.

1  
2  
3  
4  
5  
6  
7  
8  
9  
10  
11  
12  
13  
14  
15  
16  
17  
18  
19  
20  
21  
22  
23  
24  
25  
26  
27  
28  
29  
30  
31  
32  
33  
34  
35  
36  
37  
38  
39  
40  
41  
42  
43  
44  
45  
46  
47  
48  
49  
50  
51  
52  
53  
54  
55  
56  
57  
58  
59  
60

## National optimization of accessibility to emergency obstetric and neonatal care in Togo: a geospatial analysis

Andrew Curtis<sup>1,2</sup>, Jean-Pierre Monet<sup>3</sup>, Michel Brun<sup>3</sup>, Issa Abdou-Kérim Bindaoudou<sup>4</sup>,  
Idrissou Daoudou<sup>5</sup>, Marta Schaaf<sup>6</sup>, Yawo Agbigbi<sup>7</sup>, Nicolas Ray<sup>1,2,\*</sup>

<sup>1</sup> GeoHealth Group, Institute of Global Health, Faculty of Medicine, University of Geneva, Geneva, Switzerland

<sup>2</sup> Institute for Environmental Sciences, University of Geneva, Geneva, Switzerland

<sup>3</sup> Technical Division, United Nations Population Fund (UNFPA), New York City, USA

<sup>4</sup> National Institute of Statistics and Economic and Demographic Studies (INSEED), Lomé, Togo

<sup>5</sup> Ministry of Health, Lomé, Togo

<sup>6</sup> Independent Consultant, New York City, USA

<sup>7</sup> United Nations Population Fund (UNFPA), Lomé, Togo

Corresponding author: Prof. Nicolas Ray, nicolas.ray@unige.ch, GeoHealth group, Institute of Global Health, Faculty of Medicine, Campus Biotech, Chemin des Mines 9, 1202 Geneva, Switzerland

## Abstract

**Objectives:** Improving access to emergency obstetrical and neonatal care (EmONC) is a key strategy for reducing maternal and neonatal mortality. Access is shaped by several factors, including service availability and geographic accessibility. In 2013, the Ministry of Health (MoH) of Togo used service availability and other criteria to designate particular facilities as EmONC facilities, facilitating efficient allocation of limited resources. In 2018, the MoH further revised and rationalized this health facility network by applying an innovative methodology using health facility characteristics and geographical accessibility modelling to optimize timely access to EmONC services. This study compares the geographic accessibility of the network established in 2013 and the smaller network developed in 2018.

**Design:** We used data regarding travel modes and speeds, geographic barriers, and topographic and urban constraints, to estimate travel times to the nearest EmONC facilities. We compared the EmONC network of 109 facilities established in 2013 with the one composed of 73 facilities established in 2018, using three travel scenarios (walking and motorized, motorcycle-taxi, and walking-only).

**Results:** When walking and motorized travel is considered, the 2013 EmONC network covers 81.0% and 96.6% of the population at the 1-hour and 2-hour limit, respectively. These figures are slightly higher when motorcycle-taxis are considered (82.8% and 98.0%), and decrease to 34.7% and 52.3% for the walking-only scenario. The 2018 prioritized EmONC network covers 78.3% (1-hour) and 95.5% (2-hour) of the population for the walking and motorized scenario.

**Conclusions:** By factoring in geographical accessibility modeling to our iterative EmONC prioritization process, the MoH was able to decrease the designated number of EmONC facilities in Togo by about 30%, while still ensuring that a high proportion of the population has timely access to these services. However, the physical access to EmONC for women unable to afford motorized transport remains inequitable.

**Keywords:** maternal health, universal health coverage, geospatial modelling, physical accessibility, health system strengthening

### Strengths and limitations of this study

- This is the first study presenting an improvement of a network of EmONC facilities, based on the characteristics of these facilities and on realistic physical accessibility modelling.
- Country-based experts estimated the modes and speeds of transport on the various road types and off-road landcover categories, and associated uncertainty analyses assessing relative effect of travel speeds were performed.
- The EmONC prioritization approach succeeded in prioritizing 73 out of the initial 109 EmONC facilities, with only a marginal drop of population coverage. This will enable efficient use of limited resources.
- Only the physical accessibility to nearest designated EmONC services was modelled, but potential financial barriers and the fact that some patients could opt to bypass the nearest facility may also affect access to EmONC.
- Travel was modelled only for the dry season conditions, but degraded road conditions in certain parts of the country during the wet season may affect our estimates of EmONC accessibility.

## INTRODUCTION

The Sustainable Development Goal 3 (SDG3) aims to better health outcomes for different at-risk groups, including pregnant women (SDG3.1) and children under 5 years of age (SDG3.2). One of the primary strategies for reducing maternal and neonatal mortality and morbidity is ensuring timely access to quality emergency obstetric and neonatal care (EmONC)[1]. However, access to EmONC is still a challenge in many low-income countries, especially in sub-Saharan Africa[2].

Because the physical distance to facilities has long been recognized as an important component of timely access to care[3, 4], an adequate geographic distribution of EmONC facilities is a prerequisite to minimize travel times for women in need of EmONC. The World Health Organization (WHO) recommends a benchmark of no more than 2 hours of travel time to reach the nearest EmONC facility[5], as after 2 hours, an obstetric hemorrhage can be fatal.

Realistically modelling and measuring spatial accessibility to health services is therefore very important for adequate planning and improvement of access to quality healthcare for pregnant women and newborns[6]. Some studies have used simple distances[7] and time[8] metrics, as well as population-to-provider ratios (PPRs)[9]. These metrics have been popular for their ease of use and minimal need for the input of spatial data layers, i.e. data that both provide locations and describe characteristics of geographic features[10].

However, these methods are not appropriate for modelling geographic accessibility in complex terrains where different modes of transport are potentially used for a single trip, and when patients seeking care are facing an emergency, where every minute of travel time is consequential. In such cases, approaches based on least-cost path modelling (i.e., finding the fastest route between locations based on various travel constraints) have proved useful to estimate time and routing to reach the nearest care providers, and to model catchment areas of facilities[10]. Applying this modelling approach, the AccessMod tool[11] helps estimate geographic accessibility by taking into consideration the modes of transport, their respective speeds of travel on roads and off-road on various landcover types, and the influence of the topography and other barriers to movement. Studies assessing the accessibility of a variety of health care destinations have used AccessMod in their analyses[12-19]. Specific to accessibility to EmONC, Ebener and colleagues[20] have recently formalized and proposed new indicators based on least-cost path modelling.

The main objective of this study was to realistically determine and compare the overall geographic accessibility of our target population (women with obstetrical complications in need of EmONC) to two EmONC facility networks: the first one designated by the Ministry of Health

(MoH) in 2013 and the second one in 2018 through a methodology using accessibility modelling. The comparison of the two networks in terms of physical accessibility and population coverage is very useful in Togo, a country where (i) the probability of being attended at birth by qualified personnel is strongly linked to socio-economic status and where (ii) three-quarters of maternal deaths are due to direct obstetrical complications[21], which could for the most part be avoided if those experiencing complications have access to quality EmONC in less than two hours. We defined and applied various travel scenarios based on inputs from national and sub-national stakeholders, including speed and transport modes and their associated uncertainties. Besides expanding knowledge on the underlying mechanisms of geographical access to EmONC facilities in Togo, we described a robust spatially-explicit methodology for quantifying the population covered by networks of EmONC health facilities that can be replicated in other countries.

## DATA AND METHODS

### Study site and context

Togo is one of the smallest African countries in terms of landmass (approximately 56,785 km<sup>2</sup>), with a population of approximately 7.9 million in 2018[22], and it is bordered by Benin to the east, Ghana to the west and Burkina Faso to the north. More than 40% of the total population live in the southern part of the country (in the region of Maritime and in the capital city of Lomé), with 42% of this population living in urban areas[23]. The 2017 Multiple Indicator Cluster Survey (MICS 6) for Togo[24] determined that there is a strong correlation between poverty and maternal mortality and morbidity. Indeed, the probability of giving birth assisted by qualified personnel is found to be highly correlated to socio-economic status and to place of residence. The aforementioned survey determined that 98% of women in the richest quintile are assisted at birth by skilled health personal, compared to only 52% of the poorest quintile. It also highlighted the fact that 98% of women living in urban settings receive skilled birth attendance, as compared to 65% of women living in rural settings. Three quarters of maternal deaths were found to be due to direct obstetrical causes. This suggests that access to timely EmONC is essential for reducing maternal mortality in Togo.

The 2017-2022 national plan for health sector development in Togo[25] highlights that morbidity and mortality rates for mothers and newborns are still very high, and notes that this is due to insufficient supply of obstetric and neonatal care and by barriers to service access,



1  
2  
3 including financial barriers. Despite some progress over the last decades, maternal and newborn  
4 mortality are still high in Togo respectively, with 396 (80% CI: 270-557) maternal deaths per  
5 100,000 live births in 2017[25] and 25 neonatal deaths per 1,000 live births in 2018[2].  
6  
7 Improving access to quality EmONC services has been a priority for the government since the  
8 EmONC needs assessment of 2012. In 2013, the MoH used facility data to identify 109 priority  
9 health facilities designated to provide EmONC services, and launched a process to monitor  
10 them on a quarterly basis to assess and address gaps in availability and quality of care. This  
11 national network encompassed both government and NGO facilities, and its selection was done  
12 by considering several pieces of information on each facility: high obstetric activity (i.e.,  
13 favoring those with more than 30 deliveries/month), qualified human resources, capacity to  
14 organize referrals, gaps in EmONC signal functions and adequate geographic distribution.  
15 EmONC facility functionality requires enough qualified providers for 24h/7d services and the  
16 availability of key equipment, consumables, and medication for performing the key medical  
17 interventions (or signal functions) that are used to treat the direct obstetric complications that  
18 cause the vast majority of maternal deaths.  
19  
20  
21  
22  
23  
24  
25  
26  
27  
28

29 While the focus on a prioritized set of health facilities led to some progress in the  
30 availability of services, for example the increase of the proportion of EmONC facilities  
31 applying vacuum extractions from 24% in 2014 to 43% in 2016, the MoH decided in 2018 to  
32 further focus their efforts and resource allocation by further decreasing the number of priority  
33 facilities; the MoH ultimately selected 73 health facilities that should provide EmONC services  
34 in the country. This selection was guided by a methodology developed by UNFPA and  
35 formalized and described in UNFPA's EmONC Network Development Implementation  
36 Manual[26]. In brief, this methodology, based on WHO, UNFPA, and UNICEF  
37 recommendations[5], helps countries to identify a network of EmONC facilities by selecting a  
38 number of EmONC facilities that do not exceed the international norm of 5 EmONC facilities  
39 per 500,000 population, and, by prioritizing facilities that can most feasibly be supported to  
40 actually provide all the relevant EmONC signal functions 24h/7d (see Box 1) with quality care,  
41 during the next programmatic cycle of the MoH (i.e. in the next 3-4 years). The selection of  
42 health facilities is done by considering both health facility characteristics (e.g. number of  
43 deliveries, human resources, gaps in EmONC signal functions, infrastructure) and two  
44 spatially-explicit indicators[20]: the population living within 1 and/or 2-hour maximum travel  
45 time from the nearest EmONC facility (i.e. population coverage), and the quality of each  
46 referral linkage between Basic EmONC (BEmONC) health facilities and their closest  
47 Comprehensive EmONC (CEmONC) health facility. BEmONC health facilities should provide  
48  
49  
50  
51  
52  
53  
54  
55  
56  
57  
58  
59  
60

seven EmONC signal functions 24h/7d while CEmONC health facilities provide nine EmONC signal functions (see Box 1). An EmONC facility is considered as functioning when it provides services 24h/7d, and when it has performed all seven (BEmONC) or all nine (CEmONC) signal functions in the three months prior to data collection[5]. A non-functioning EmONC facility has failed to provide one or more EmONC signal functions during that same period.

**Box 1:** Emergency obstetrical and neonatal care (EmONC) signal functions

| <b>Services available 24h/24 and 7d/7</b>                                                                                                                                                                                                                                                                                                                                                                                     |                                                                                                                                                                           |
|-------------------------------------------------------------------------------------------------------------------------------------------------------------------------------------------------------------------------------------------------------------------------------------------------------------------------------------------------------------------------------------------------------------------------------|---------------------------------------------------------------------------------------------------------------------------------------------------------------------------|
| <p><b>Basic EmONC (BEmONC) signal functions</b></p> <ol style="list-style-type: none"> <li>1) Administer parenteral antibiotics</li> <li>2) Administer uterotonic drugs</li> <li>3) Administer parenteral anticonvulsants</li> <li>4) Perform manual removal of the placenta,</li> <li>5) Remove retained products</li> <li>6) Perform assisted vaginal delivery</li> <li>7) Perform basic neonatal resuscitation.</li> </ol> | <p><b>Comprehensive EmONC (CEmONC) signal functions</b></p> <p>BEmONC signal functions (1-7)<br/>+<br/>8) Perform blood transfusion<br/>9) Perform Caesarean section.</p> |

### Accessibility & population coverage modelling

We used AccessMod, a WHO stand-alone and open-source geospatial tool[11, 27], to analyze the physical accessibility to, and the population coverage of, the national networks of EmONC health facilities in Togo in 2013 and 2018. AccessMod is based on a least-cost path algorithm that computes the fastest route between any location and the nearest health service (for details, see [11]). It can consider several sequential modes of travel (e.g. walking to a road, where one catches a motorized vehicle), several types of barriers to movement, health facility capacity, and population, when determining catchment areas. Moreover, AccessMod considers the direction of movement by applying an anisotropic analysis (i.e. considering the slope of the terrain to accurately model bicycling and walking speeds). Contrary to many accessibility modelling approaches that are based on a perfectly routable road data set (such as Nichols et al[28]), AccessMod can consider off-road travel in addition to road travel. On- and off-road travel speeds and modes of transport are user-defined in a travel scenario that assigns these travel constraints to each land cover and/or road category found in the input data.

1  
2  
3 For the movements of our target population, we defined three distinct travel scenarios  
4 from home to the nearest EmONC facility: 1) a walking & motorized scenario, 2) a motorcycle-  
5 taxi scenario, and 3) a walking-only scenario. The first scenario assumes that patients walk to  
6 the nearest road and then use a motorized mode of transportation (car, minibus or other  
7 motorized vehicle, either private or public), immediately available, to continue their journey.  
8 In the second scenario, patients use only a motorcycle-taxi to travel on- and off-road, with  
9 different speeds depending on the land cover. Finally, the third scenario assumes patients are  
10 walking or being carried (e.g. on stretchers, carts) at walking speed (or lower).  
11

12 The choice for these three scenarios and their associated modes and speeds of travel  
13 were decided through an iterative process of two workshops in Togo in 2016-2018. A first 3-  
14 day workshop took place in May 2016 to strengthen national capacity to analyze the geographic  
15 accessibility of health facilities in Togo by using AccessMod. The thirty Togolese participants  
16 were technical experts from the MoH, the national Togolese Institute for Statistics, Economic  
17 and Demographic studies (INSEED), NGOs and UN agencies, and other key stakeholders (e.g.,  
18 regional health director, monitoring expert) from all regions of Togo. The pool of experts  
19 discussed and agreed on the specifics of how women with obstetrical emergency typically travel  
20 when they need to reach an EmONC facility in Togo. Average speeds of travel on all road  
21 categories were estimated by consensus, with the walking & motorized scenario deemed to be  
22 the most frequent. During a second workshop in May 2018, health stakeholders from each of  
23 the 6 regions of Togo gathered to define which health facilities should comprise their EmONC  
24 facility regional network, using the prioritization methodology described above to select a  
25 number of EmONC facilities per region not exceeding the international norm of 5 EmONC  
26 facilities per 500,000 population. These participants further refined the travel scenarios, and  
27 agreed that bicycles and public transport were rarely used, with the exception of a public bus  
28 system operating in greater Lomé [29]. In both workshops, participants recognized that during  
29 the wet season the speeds of travel generally decrease in many areas. However, they decided to  
30 use only a dry season scenario to guide planning as this is the longest season in Togo, around 8  
31 months. The final travel speeds chosen for the three scenarios are found in Supplement 1.  
32

33 Road speeds in urban areas were adjusted in order to simulate slower motorized travel  
34 occurring in intra-urban contexts due to various factors such as stoplights, traffic, pedestrians,  
35 and other hazards. For the walking & motorized scenario, we lowered travel speeds on asphalted  
36 roads, secondary roads and tracks to 40 km/h, 30 km/h and 10 km/h, respectively. For the  
37 motorcycle-taxi scenario, these average travel speeds were lowered to 30 km/h, 15 km/h and  
38  
39  
40  
41  
42  
43  
44  
45  
46  
47  
48  
49  
50

1  
2  
3 10 km/h. These speed corrections were applied on all road segments falling within the extent  
4 of the urban areas informed by the Global Rural Urban Mapping Project[30].  
5  
6  
7

## 8 **Uncertainty analysis**

9  
10 To account for uncertainty in travel speeds, we additionally ran each consensus travel  
11 scenario with 20% slower or 20% faster speeds compared to the consensus scenario, following  
12 the methodology developed in Ouma et al.[17] and in Stewart et al.[31]. This translated to lower  
13 and upper uncertainty bounds on the reported output statistics. To further disentangle the effects  
14 of uncertainties on the speeds on roads and off roads, we ran scenario 1 by keeping on-road  
15 speeds constant (at consensus values) and varying off-road speeds by the plus or minus 20%.  
16 Conversely, we ran this scenario keeping off-road speeds constant and varying on-road speeds.  
17 Finally, to test the model's sensitivity to the consideration of topography, we also ran each  
18 consensus travel speed scenario without considering slope correction (i.e., isotropic mode).  
19  
20  
21  
22  
23  
24  
25

26 Two uncertainty indicators were produced: (1) lower and upper uncertainty bounds on  
27 the variation in percentage (per region and for the whole country) of the coverage of population  
28 living less than one and less than two hours away from the closest EmONC facility, and (2) a  
29 series of spatially-explicit uncertainty maps. In these uncertainty maps, pixel values indicate  
30 the extent of the uncertainty of travel time to the nearest EmONC facility, obtained by  
31 subtracting the travel time grid resulting from the "- 20%" travel speeds scenario by the one  
32 resulting from the "+ 20%" travel speeds scenario. This highlights the areas in the country where  
33 the travel time estimates have the most uncertainty.  
34  
35  
36  
37  
38  
39  
40

## 41 **Input geospatial data**

42  
43 Various datasets were assembled and prepared to run the geospatial analyses in  
44 AccessMod. Details of the preparation steps are found in Supplement 2. We considered barriers  
45 to terrestrial movements composed of quarries and bodies of water, such as rivers, lakes and  
46 damned areas. The barriers file was created by the Togolese Ministry of Agriculture, Livestock  
47 and Hydraulics[32] (figure 1A). We used the road network created by the *Direction de la*  
48 *Cartographie nationale et du cadastre* of Togo, classified in three hierarchical categories:  
49 asphalted roads, secondary roads, and tracks[33] (figure 1B). We obtained the Digital Elevation  
50 Model (DEM) of Togo from NASA' Shuttle Radar Topography Mission[34] (figure 1C).  
51 Slopes were derived from the DEM directly in AccessMod.  
52  
53  
54  
55  
56  
57  
58  
59  
60

1  
2  
3 We used the population density data set from the Worldpop project[35], provided with  
4 UN-adjusted population count from 2013 (figure 1D) and 2018 (figure 1E). We assumed that  
5 the target population of women with obstetrical complications is uniformly distributed across  
6 the overall population. Land cover information was provided by INSEED, with a land cover  
7 data set composed of twelve categories (figure 1F). We obtained the names and geographic  
8 coordinates of the 109 EmONC facilities composing the initial national network of EmONC  
9 health facilities in 2013 from INSEED (figure 1G). We further verified these names and  
10 coordinates with the help of the MoH. For the EmONC health facilities network of 2018 (figure  
11 1H), the 73 final designated set of facilities was obtained through the MoH[36]. Finally, the  
12 most recent administrative boundaries at the prefectural, regional and national levels were  
13 created and made available by INSEED using data collected during the 2010 general census[37]  
14 (see figure 1I). These datasets were used to determine the percentage of population coverage  
15 for each administrative unit.  
16  
17  
18  
19  
20  
21  
22  
23  
24  
25  
26

## 27 **Patients and the public involvement**

28  
29  
30 There was no patient or public involvement in this study. Health facility names and  
31 geographic coordinates, as well as administrative boundaries, were shared by INSEED. The  
32 road network was shared by the *Direction de la Cartographie nationale et du cadastre* of  
33 Togo. The barriers to movement datasets were provided by the *Ministère de l'agriculture, de*  
34 *la production animale et halieutique*. All other geospatial data were publicly available.  
35  
36  
37  
38  
39  
40

## 41 **RESULTS**

42  
43 The accessibility maps for the walking & motorized scenario, and the motorcycle-taxi  
44 scenario, and for the two time periods, are shown in figure 2, with the respective maps for the  
45 walking-only scenario in Supplement 3. In 2013, estimated physical access was highest under  
46 scenario 2 (motorcycle-taxi scenario), with 82.8% of the total population less than one hour  
47 away from the nearest EmONC health facility, and 98% less than two hours away from the  
48 nearest EmONC health facility. For the walking & motorized scenario, these estimations are  
49 81% at the 1-hour travel time limit and 96.7% at the 2-hour limit respectively.  
50  
51  
52  
53

54 Using the 2018 network of 73 facilities, population coverages using the motorcycle-taxi  
55 scenario are 79.2% at the 1-hour travel time limit and of 96% at the 2-hour limit. Compared to  
56 the 2013 network, these population coverages are lower by 3.6% (of the total population) at the  
57  
58  
59  
60

1-hour threshold and by 2% at the 2-hour limit. With the walking & motorized scenario, the corresponding results are 78.3% at the 1-hour limit and 95.5% at the 2-hour limit. Compared to the initial estimations for the 2013 network, population coverage for that scenario has only dropped by 2.7% and 1.2% respectively. Despite a reduction of the number of EmONC health facilities by one-third from 2013 to 2018, the population able to physically access the closest EmONC health facility within one or two hours is only marginally lower compared to the 2018 prioritized network.

For both time periods, population coverage at national scale is only marginally higher for the motorcycle-taxi travel scenario when comparing to the walking & motorized scenario, even though this translates to a much larger extent of the country's surface under the 2-hour maximum travel time limit (green areas in figure 2). We also see that accessibility is highly dependent on roads in scenario 1. This is the case for instance in parts of the Atacora mountains (large red areas in the central-western part of the country in figure 2), a region with a very low population density and almost no roads (according to our data). With scenario 2, travel is less dependent on roads than in scenario 1, but access tends nevertheless to be higher around the road network, even though travel speeds on roads are lower for the motorcycle-taxi scenario than for the walking & motorized scenario. The results for the 2018 network at regional level are given in Table 1, and at prefectural level in Supplement 2.

Table 1: Percentage of population living less than one- or two-hour travel time to the nearest EmONC facility, in 2018, per region and for the country, with uncertainty intervals within brackets.

| Region         | Walking & motorized scenario |                           | Motorcycle-taxi scenario  |                           | Walking-only scenario     |                           |
|----------------|------------------------------|---------------------------|---------------------------|---------------------------|---------------------------|---------------------------|
|                | 1-hour                       | 2-hour                    | 1-hour                    | 2-hour                    | 1-hour                    | 2-hour                    |
| Plateaux       | 55.4 [44.4 - 65.1]           | 89.8 [80.7 - 95.2]        | 58.7 [49.2 - 66.3]        | 88.4 [78.5 - 94.6]        | 10.9 [8.3 -13.3]          | 22.6 [18.1 -27.2]         |
| Kara           | 62.7 [52.3 - 71.0]           | 90.2 [82.8 - 94.1]        | 65.2 [56.7 - 72.0]        | 92.8 [84 - 97.7]          | 14.5 [11.0 -17.8]         | 29.3 [23.9 -34.7]         |
| Maritime       | 94.4 [90.1 - 96.7]           | 99.4 [98.6 - 99.7]        | 96.9 [93.7 - 98.5]        | 99.9 [99.7 - 100]         | 47.7 [36.7 -57.0]         | 76.4 [70.2 -80.9]         |
| Centrale       | 65.2 [53.0 - 74.7]           | 91.7 [86.6 - 93.9]        | 66.5 [56.1 - 75.7]        | 96.2 [90.0 - 98.5]        | 18.1 [12.6 -23.4]         | 35.7 [31.3 -38.7]         |
| Savanes        | 80.7 [68.9 - 87.9]           | 98.9 [96.0 - 99.6]        | 72.5 [58.9 - 81.8]        | 97.9 [93.3 - 99.9]        | 11.4 [8.4 -14.2]          | 24.2 [19.1 -30.0]         |
| Lomé Commune   | 100 [100 - 100]              | 100 [100 - 100]           | 100 [100 - 100]           | 100 [100 - 100]           | 100 [93.9 -100]           | 100 [100 -100]            |
| <b>Country</b> | <b>78.3 [70.5 - 84.0]</b>    | <b>95.5 [91.6 - 97.5]</b> | <b>79.2 [72.2 - 84.3]</b> | <b>96.0 [91.6 - 98.4]</b> | <b>33.4 [27.1 - 38.4]</b> | <b>50.8 [46.0 - 55.0]</b> |

The region of Lomé Commune has 100% population coverage for both time thresholds and both motorized scenarios, which is due to the combined effect of a very densely populated region of only 90 km<sup>2</sup> with 11 EmONC facilities in 2018, and a good road network that permits the Lomé population to access the closest EmONC in less than 1 hour travel time. In contrast,

1  
2  
3 the rural region of Plateaux presents much more heterogeneous results, with large uncertainty  
4 intervals. The results at prefectural level are available in Supplement 3.

5  
6 We illustrate in figure 3 the uncertainty in travel time for the walking & motorized  
7 scenario on the 2018 facility dataset, separated for the effects of speed uncertainty on roads and  
8 landcover. The maps show a spatially heterogeneous distribution of the uncertainties, especially  
9 in the case of the road speed uncertainty map with widespread uncertainties in all areas of the  
10 country, but with relatively low uncertainties along the asphalted road network. Similar maps  
11 for the uncertainty linked to the DEM are found in Supplement 4.

12  
13 The landcover and road uncertainty maps show that uncertainty is strongest in areas  
14 with very little population density (see figure 1E). The total uncertainty map, combining  
15 uncertainty from roads and landcover, further highlights the fact that uncertainty is quite low  
16 on roads close to facilities and increases in more rural areas.

17  
18 As expected for the walking-only scenario, national population coverage of the 2018  
19 network notably drops to 33.4% within 1-hour walking, and 50.8% within 2-hour walking.  
20 Large differences in coverage are found between regions, with the southern more urban regions  
21 of Lomé and Maritime achieving higher accessibility results than the more rural areas of the  
22 country. Indeed, while the two aforementioned regions reach coverage percentages of 100%  
23 and 76.4% respectively at the two-hour threshold, the coverage percentages do not exceed 40%  
24 for all the other modelled regions.

## 25 26 27 28 29 30 31 32 33 34 35 36 37 38 **DISCUSSION**

39  
40 The accessibility maps that were produced according to our three travel models illustrate  
41 the differences in accessibility in different parts of the country. This can help identify areas in  
42 the country where geographic accessibility to EmONC facilities is most difficult. These areas  
43 could be targeted for remedial efforts, such as mobile outreach, posting community health  
44 workers for reducing decision time to seek care, the creation of maternity waiting homes in the  
45 EmONC health facilities of the region, or planning improvement of the road infrastructure.

46  
47 The three alternative models used to obtain these maps reflect different socio-economic  
48 segments of the population. If patients can afford to take a motorized vehicle after having  
49 reached the closest road or use a motorcycle-taxi from their home, then more than 78% of the  
50 population can reach the closest EmONC facility (as per the 2018 designation) in less than 1  
51 hour. When considering 2-hour maximum travel time, this percentage is much higher, with 95%  
52 of the population able to reach the nearest facility within the time limit. We also note that the  
53 motorcycle-taxi scenario covers much larger areas of the country (green areas in Figure 2) in  
54  
55  
56  
57  
58  
59  
60

1  
2  
3 comparison to the walking & motorized scenario. Nevertheless, this does not result in a  
4 substantial increase in population coverage. This is explained by the fact that many areas where  
5 access is very low in scenario 1 are fairly unpopulated.  
6  
7

8 For women who have no access to motorized means of transport, accessibility to  
9 EmONC within one hour drastically decreases to about 33% of the population, and to 51%  
10 within the 2-hour threshold travel time limit. Thus, nearly half of the target population does not  
11 have access to EmONC in the maximum acceptable travel time if they cannot afford to travel  
12 by motorized means of transport. As anticipated, access to EmONC is greater for urban  
13 populations, even with substantially decreased travel speeds, due to a higher density of both  
14 EmONC facilities and road networks in urban areas.  
15  
16  
17  
18  
19

20 Though the 2018 prioritized EmONC network included 36 fewer facilities than the 2013  
21 network, the 2018 network still achieves high overall geographic accessibility, with all regions  
22 obtaining estimated coverage percentage of 90% and more. It only drops marginally in terms  
23 of population coverage (between 1 and 3.6 percentage points depending on the scenario) when  
24 compared to the initial network of 109 designated EmONC facilities in 2013. However, from a  
25 planning perspective, prioritizing the EmONC functionality of 73, rather than 109, facilities is  
26 a more feasible, achievable goal for the next MoH programmatic cycle (i.e. 3-4 years). The  
27 number of prioritized EmONC facilities is lower than the international norm that targets around  
28 80 functional EmONC facilities for the 2018 population of Togo. However, the decision of the  
29 MoH to target this prioritized network was commensurate with available resources and the  
30 modelling results showing that this network can nevertheless ensure timely access to a large  
31 proportion of the population in case of obstetrical complications.  
32  
33  
34  
35  
36  
37  
38  
39  
40

41 Our uncertainty analysis has shown that population coverage estimates are also most  
42 sensitive to uncertainties on the speeds on roads, as compared to the speeds off roads. This  
43 highlights the need for great caution when choosing travel speeds. A good representativeness  
44 of local experts, both in terms of knowledge about the specific travel behaviors of the target  
45 population and in terms of possible regional specificities for travel is vitally important. Other  
46 sources of information on effective travel speeds (e.g. using speed tracker onboard vehicles or  
47 mobile phones) could be very useful if available in the future. Furthermore, spatially displaying  
48 the uncertainty regarding travel times highlights the regions where this uncertainty is the  
49 highest, and that could be given high priority for future improvements of model  
50 parametrization. These improvements can be achieved by ensuring that all roads are well  
51 captured, or incorporating possible region-specific alternative means of transport.  
52  
53  
54  
55  
56  
57  
58  
59  
60



## Limitations

Although our study has produced the first high-resolution model of geographic accessibility to EmONC facilities in Togo, several limitations should be noted. First, our models only consider physical accessibility of the national network of EmONC health facilities. Although the three alternative transport models were created to acknowledge that motorized travel is not financially possible for some, there are additional financial barriers – such as formal and informal expenditures for health care – that our models do not address. Acceptability (i.e. "the match between how responsive health service providers are to the social and cultural expectations of individual users and communities", as mentioned in Peters et al.[38]) was also not considered. Immediate availability of motorized transport was also assumed in our models, which could over-estimate accessibility in cases where delays for finding transport are significant. Variable quality of interpersonal and clinical care in facilities can also affect which facility patients chose; they may not choose the closest facility in terms of travel time[39], possibly bypassing BEmONC health facilities in certain cases. We also assumed no delay in the decision to seek care. Clearly, further research on how to incorporate these other facets of accessibility could improve our models and our understanding of the spatial variability of effective access to EmONC.

Second, the workshop participants decided to model travel during the dry season conditions. The extent of the degradation of road conditions could not be captured in certain parts of the countries during the wet season, and this is known to heavily affect travel time. A more balanced view of regional accessibility to EmONC could be achieved by factoring in these seasonal specificities.

Third, our analyses were built on a uniform uncertainty range ( $\pm 20\%$ ) on all roads and landcover categories. This could be improved by applying parameter-specific uncertainty ranges, notably on the different road types. This could be captured by a dedicated workshop with regional experts having a thorough knowledge of the road network, providing more realistic uncertainty ranges on motorized and walking speeds, possibly complemented by field observations or facility-based surveys. Lowering uncertainties on the travel scenario, and therefore on population coverage estimates, would improve decision making for prioritized resource allocation.

Finally, we analyze the coverage to the closest designated EmONC health facilities, which includes facilities that are actually functioning (as per our definition of functioning), as well as those that are not. The quarterly monitoring of the national network of EmONC health facilities in Togo started in 2015, and was included in the health management information

1  
2  
3 system in 2020. This provides up-to-date information on the functionality of EmONC health  
4 facilities. The aim is to attain a network of functioning EmONC facilities, which is essential to  
5 help decrease maternal mortality/morbidity. Applying the same modeling approach described  
6 here to only functioning EmONC facilities would provide up-to-date population coverage  
7 indicators at national and subnational level that can inform decision makers regarding the  
8 remaining gaps in order to optimize resource allocation. This will be the subject of a  
9 forthcoming publication.

## 16 17 **CONCLUSION**

18  
19 The physical accessibility mapping of the national network of EmONC health facilities  
20 in Togo proved to be very useful in understanding the potential of the revised network to  
21 provide quality EmONC services to a large proportion of the population, while pointing to those  
22 areas with less accessibility. Using realistic modelling based on travel times, the accessibility  
23 analyses provided key information to the 2018 EmONC prioritization exercise, which aimed at  
24 finding a balance between designating a smaller number of facilities as EmONC to channel  
25 needed resources to these priority sites for improving quality of care, and ensuring good  
26 coverage of the population within 1 hour of travel time to the closest designated EmONC health  
27 facility.

28  
29 The application of this methodology in Togo can be replicated in other countries thanks  
30 to the current online availability of key high-resolution geospatial data sets. This is of particular  
31 importance where mapping of physical accessibility is a crucial component for bettering health  
32 outcomes for women and newborns.

## 43 44 **ACKNOWLEDGMENTS**

45  
46 We thank the Ministry of Health (*Ministère de la santé et de la protection sociale*) of  
47 Togo for their engagement in the implementation of the EmONC facility network in Togo,  
48 INSEED for help in data preparation, and UNFPA-Togo and UNFPA Maternal Health  
49 Thematic Fund for organizing the workshops. We are grateful to Michelle Schmitz and Orvalho  
50 Augusto for their careful review of an earlier version of the manuscript. The authors express  
51 their gratitude to all workshop attendees, whose active participation contributed to informing  
52 the accessibility models. The Averting Maternal Death and Disability (AMDD) Program at the  
53 Columbia University Mailman School of Public Health provided technical support; Marta  
54 Schaaf worked at AMDD at the time this work was undertaken.

## AUTHOR CONTRIBUTION

**Andrew Curtis:** conceptualization, methodology, formal analysis, writing, editing, visualization, validation. **Jean-Pierre Monet:** methodology, writing, editing, validation.

**Michel Brun:** methodology, writing, editing, validation, supervision. **Issa Abdou-Kérim**

**Bindaoudou:** data sharing, editing, validation. **Idrissou Daoudou:** data sharing, editing, validation. **Marta Schaaf:** methodology, writing, editing, validation. **Yawo Agbigbi:** data sharing, editing, validation. **Nicolas Ray:** conceptualization, methodology, writing, editing, validation, supervision.

## FUNDING

This work was partly funded by UNFPA/maternal and newborn health thematic fund (MHTF). Award/grant number: not applicable.

## COMPETING INTERESTS

None declared.

## DATA AVAILABILITY STATEMENT

Data are available on reasonable request. Most data used in this study are openly accessible through the indicated data sources in the "Input geospatial data" section. Health facility names and geographic coordinates, as well as administrative boundaries are available on request to INSEED. Road data are available on request to the *Direction de la Cartographie nationale et du cadastre* of Togo. Data on barriers to movement are available on request to the *Ministère de l'agriculture, de la production animale et halieutique* of Togo.

## ETHICS STATEMENT

### Patient consent for publication

Not required.

## References

1. Human Reproduction Program, World Health Organization. Strategies toward ending preventable maternal mortality (EPMM). Geneva, Switzerland; 2015. [accessed 08.10.2020]  
[https://apps.who.int/iris/bitstream/handle/10665/153544/9789241508483\\_eng.pdf;jsessionid=AB036F2DFE7A4ABBB00BE525D91915BD?sequence=1](https://apps.who.int/iris/bitstream/handle/10665/153544/9789241508483_eng.pdf;jsessionid=AB036F2DFE7A4ABBB00BE525D91915BD?sequence=1)

2. UNFPA. The Maternal and Newborn Health Thematic Fund Annual Report 2018 - Fund Annual Report 2018. 2019. [accessed 08.10.2020]  
[https://www.unfpa.org/sites/default/files/pub-pdf/013\\_MHTF\\_Annual\\_report\\_15-online.pdf](https://www.unfpa.org/sites/default/files/pub-pdf/013_MHTF_Annual_report_15-online.pdf)
3. Gabrysch S, Campbell OMR. Still too far to walk: Literature review of the determinants of delivery service use. *BMC Pregnancy Childbirth*. 2009;9:18. [accessed 05.04.2021] doi: 10.1186/1471-2393-9-34
4. Kyei-Nimakoh M, Carolan-Olah M, McCann TV. Access barriers to obstetric care at health facilities in sub-Saharan Africa-a systematic review. *Syst Rev*. 2017;6:16. [accessed 05.04.2021] doi: 10.1186/s13643-017-0503-x
5. World Health Organization, United Nations Population Fund, Mailman School of Public Health, et al. Monitoring emergency obstetric care : a handbook. Geneva: World Health Organization; 2009.
6. Ebener S, Guerra-Arias M, Campbell J, et al. The geography of maternal and newborn health: the state of the art. *International Journal of Health Geographics*. 2015;14:10. [accessed 05.04.2021] doi: 10.1186/s12942-015-0012-x
7. Noor AM, Gikandi PW, Hay SI, et al. Creating spatially defined databases for equitable health service planning in low-income countries: the example of Kenya. *Acta Trop*. 2004;91(3):239-251. [accessed 05.04.2021] doi: 10.1016/j.actatropica.2004.05.003
8. Macharia PM, Ouma PO, Gogo EG, et al. Spatial accessibility to basic public health services in South Sudan. *Geospatial Health*. 2017;12(1):106-113. [accessed 05.04.2021] doi: 10.4081/gh.2017.510
9. Donohoe J, Marshall V, Tan X, et al. Evaluating and comparing methods for measuring spatial access to mammography centers in Appalachia. *Health Serv Outcomes Res Methodol*. 2016;16(1-2):22-40. [accessed 05.04.2021] doi: 10.1007/s10742-016-0143-y
10. Neutens T. Accessibility, equity and health care: review and research directions for transport geographers. *J Transp Geogr*. 2015;43:14-27. [accessed 05.04.2021] doi: 10.1016/j.jtrangeo.2014.12.006
11. Ray N, Ebener S. AccessMod 3.0: computing geographic coverage and accessibility to health care services using anisotropic movement of patients. *International Journal of Health Geographics*. 2008;7:17. [accessed 05.04.2021] doi: 10.1186/1476-072x-7-63
12. Alegana VA, Wright JA, Pentrina U, et al. Spatial modelling of healthcare utilisation for treatment of fever in Namibia. *International Journal of Health Geographics*. 2012;11:13. [accessed 05.04.2021] doi: 10.1186/1476-072x-11-6
13. Aoun N, Matsuda H, Sekiyama M. Geographical accessibility to healthcare and malnutrition in Rwanda. *Soc Sci Med*. 2015;130:135-145. [accessed 05.04.2021] doi: 10.1016/j.socscimed.2015.02.004
14. Costa C, Santana P, Almendra R, et al. And when there is no information? The case of São tomé and Príncipe. International Conference on Sustainability Measurement and Modeling; 2009; Terrassa, Spain. [accessed 08.10.2020]  
[https://www.researchgate.net/publication/270507560\\_And\\_when\\_there\\_is\\_no\\_information\\_The\\_case\\_of\\_Sao\\_tome\\_and\\_Principe](https://www.researchgate.net/publication/270507560_And_when_there_is_no_information_The_case_of_Sao_tome_and_Principe)
15. Fisher RP, Myers BA. Free and simple GIS as appropriate for health mapping in a low resource setting: a case study in eastern Indonesia. *International Journal of Health Geographics*. 2011;10:11. [accessed 05.04.2021] doi: 10.1186/1476-072x-10-15
16. Munoz UH, Kallestal C. Geographical accessibility and spatial coverage modeling of the primary health care network in the Western Province of Rwanda. *International Journal of Health Geographics*. 2012;11:11. [accessed 05.04.2021] doi: 10.1186/1476-072x-11-40
17. Ouma PO, Maina J, Thurairana PN, et al. Access to emergency hospital care provided by the public sector in sub-Saharan Africa in 2015: a geocoded inventory and spatial

- analysis. *Lancet Glob Health*. 2018;6(3):E342-E350. [accessed 05.04.2021] doi: 10.1016/s2214-109x(17)30488-6
18. Juran S, Broer PN, Klug SJ, et al. Geospatial mapping of access to timely essential surgery in sub-Saharan Africa. *BMJ Glob Health*. 2018;3(4):10. [accessed 05.04.2021] doi: 10.1136/bmjgh-2018-000875
  19. Schmitz MM, Serbanescu F, Kamara V, et al. Did Saving Mothers, Giving Life Expand Timely Access to Lifesaving Care in Uganda? A Spatial District-Level Analysis of Travel Time to Emergency Obstetric and Newborn Care. *Global Health: Science and Practice*. 2019;7:S151-S167. [accessed 05.04.2021] doi: 10.9745/ghsp-d-18-00366
  20. Ebener S, Stenberg K, Brun M, et al. Proposing standardised geographical indicators of physical access to emergency obstetric and newborn care in low-income and middle-income countries. *BMJ Glob Health*. 2019;4:11. [accessed 05.04.2021] doi: 10.1136/bmjgh-2018-000778
  21. Say L, Chou D, Gemmill A, et al. Global causes of maternal death: a WHO systematic analysis. *Lancet Glob Health*. 2014;2(6): e323-e333.
  22. The World Bank Group. Togo - Data [Internet]. [accessed 08.07.2020]. Available from: <https://data.worldbank.org/country/TG>.
  23. Central Intelligence Agency. Africa - Togo - The World Factbook - Central Intelligence Agency [Internet]. [accessed 09.07.2020]. Available from: <https://www.cia.gov/library/publications/the-world-factbook/geos/to.html>.
  24. INSEED. MICS 6 Togo. Lomé, Togo; 2017. [accessed 08.10.2020] <https://washdata.org/report/togo-2017-mics-report-v2>
  25. Ministère de la Santé et de l'Hygiène publique. Plan National de Développement 2017-2022. Lomé, Togo; 2017. [accessed 08.10.2020] <http://extwprlegs1.fao.org/docs/pdf/Tog184007.pdf>
  26. Brun M, Monet JP, Agbigbi Y, Lysias J, Moreira I, Schaaf M, Ray N. Implementation manual for developing a national network of maternity units – Improving Emergency Obstetric and Newborn Care (EmONC). UNFPA, New York; 2020. [accessed 05.04.2021] Available from: <https://www.unfpa.org/featured-publication/implementation-manual-developing-national-network-maternity-units>
  27. Ray N, Ebener S. AccessMod 5 user manual - User manual (English) [Internet]. Geneva, Switzerland: University of Geneva; [accessed 08.10.2020]. Available from: <https://doc-accessmod.unepgrid.ch/display/EN/>.
  28. Nichols BE, Girdwood SJ, Crompton T, et al. Impact of a borderless sample transport network for scaling up viral load monitoring: results of a geospatial optimization model for Zambia. *J Int AIDS Soc*. 2018;21(12):9. [accessed 05.04.2021] doi: 10.1002/jia2.25206
  29. Département des transports du développement urbain et des TIC. Le secteur du transport au Togo - Bref aperçu. Groupe de la Banque Africaine de Développement; 2014 [accessed 08.10.2020] [https://www.afdb.org/fileadmin/uploads/afdb/Documents/Publications/AfDB\\_-\\_Togo\\_-\\_Note\\_sur\\_le\\_secteur\\_du\\_transport.pdf](https://www.afdb.org/fileadmin/uploads/afdb/Documents/Publications/AfDB_-_Togo_-_Note_sur_le_secteur_du_transport.pdf)
  30. Center for International Earth Science Information Network - CIESIN - Columbia University, International Food Policy Research Institute - IFPRI, The World Bank, et al. Global Rural-Urban Mapping Project, Version 1 (GRUMPv1): Urban Extent Polygons, Revision 01 [Internet]. NASA Socioeconomic Data and Applications Center (SEDAC). 2017 [accessed 09.07.2020]. Available from: <https://doi.org/10.7927/H4Z31WKF>.
  31. Stewart BT, Tansley G, Gyedu A, et al. Mapping Population-Level Spatial Access to Essential Surgical Care in Ghana Using Availability of Bellwether Procedures. *Jama Surgery*. 2016;151(8). [accessed 05.04.2021] doi: 10.1001/jamasurg.2016.1239

- 1  
2  
3 32. Ministère de l'agriculture, de la production animale et halieutique. Barriers to movement.  
4 Lomé, Togo; 2016.  
5  
6 33. Direction de la Cartographie nationale et du cadastre. Road network of Togo. Lomé,  
7 Togo; 2016.  
8  
9 34. Jarvis A, Reuter H, Nelson A, et al. Hole-filled SRTM for the globe version 3, from the  
10 CGIAR-CSI SRTM 90m database [Internet]. 2008 [accessed 08.10.2020]. Available  
11 from: <http://srtm.csi.cgiar.org>.  
12  
13 35. Worldpop, CIESIN. The spatial distribution of population with country total adjusted to  
14 match the corresponding UNPD estimate - Togo [Internet]. 2013 [accessed 08.10.2020].  
15 Available from:  
16 [ftp://ftp.worldpop.org.uk/GIS/Population/Global\\_2000\\_2020/2019/TGO/tgo\\_ppp\\_2019\\_](ftp://ftp.worldpop.org.uk/GIS/Population/Global_2000_2020/2019/TGO/tgo_ppp_2019_UNadj.tif)  
17 [UNadj.tif](ftp://ftp.worldpop.org.uk/GIS/Population/Global_2000_2020/2019/TGO/tgo_ppp_2019_UNadj.tif).  
18  
19 36. Brun M, Agbigbi Y, Bindaoudou K, et al. Priorisation et cartes des soins obstétricaux et  
20 néonataux d'urgence au Togo. Lomé, Togo; 2020. [accessed]  
21  
22 37. INSEED. Administrative boundaries. Lomé, Togo; 2016.  
23  
24 38. Peters DH, Garg A, Bloom G, et al. Poverty and access to health care in developing  
25 countries. *AnnNY AcadSci*. 2008;1136:161-171. [accessed 05.04.2021] doi:  
26 10.1196/annals.1425.011  
27  
28 39. Kruk ME, Gage AD, Arsenault C, et al. High-quality health systems in the Sustainable  
29 Development Goals era: time for a revolution. *Lancet Glob Health*. 2018;6(11):E1196-  
30 E1252. [accessed 05.04.2021] doi: 10.1016/s2214-109x(18)30386-3  
31  
32  
33  
34  
35  
36  
37  
38  
39  
40  
41  
42  
43  
44  
45  
46  
47  
48  
49  
50  
51  
52  
53  
54  
55  
56  
57  
58  
59  
60

## Figure legends

**Figure 1** - Vector and raster data sets used. (A) Barriers to movement (rivers, waterbodies, lakes); (B) Road network; (C) Digital Elevation Model (DEM); (D) 2013 Population density raster; (E) 2018 Population density raster; (F) Landcover raster; (G) 2013 EmONC facilities; (H) 2018 EmONC facilities; (I) Administrative boundaries (prefectures, regions and Global Rural-Urban Mapping Project (GRUMP) urban extents) with region names.

**Figure 2** - Maps of the travel time to the nearest EmONC facility using either the walking & motorized scenario, the motorcycle-taxi scenario and the walking-only scenario, for both time periods (2013 and 2018).

**Figure 3** - Uncertainty maps of the travel times to the nearest facility for the walking & motorized scenario on the 2018 EmONC facility network using (A) Road uncertainty, (B) Landcover (off-road) uncertainty, and (C) Total uncertainty.



Figure 1 - Vector and raster data sets used. (A) Barriers to movement (rivers, waterbodies, lakes); (B) Road network; (C) Digital Elevation Model (DEM); (D) 2013 Population density raster; (E) 2018 Population density raster; (F) Landcover raster; (G) 2013 EmONC facilities; (H) 2018 EmONC facilities; (I) Administrative boundaries (prefectures, regions and Global Rural-Urban Mapping Project (GRUMP) urban extents) with region names.





Figure 2 - Maps of the travel time to the nearest EmONC facility using either the walking & motorized scenario, the motorcycle-taxi scenario and the walking-only scenario, for both time periods (2013 and 2018).



Figure 3 - Uncertainty maps of the travel times to the nearest facility for the walking & motorized scenario on the 2018 EmONC facility network using (A) Road uncertainty, (B) Landcover (off-road) uncertainty, and (C) Total uncertainty.

## SUPPLEMENTARY MATERIAL

## Supplement 1: travel scenario tables

## Walking &amp; Motorized scenario

| Class | Label                                               | Label (English)                                               | Speed (km/h) | Mode      |
|-------|-----------------------------------------------------|---------------------------------------------------------------|--------------|-----------|
| 11    | Forets denses                                       | Dense forest                                                  | 1.5          | WALKING   |
| 12    | Forets riveraines                                   | Riparian forest                                               | 1.5          | WALKING   |
| 13    | Forets claires,<br>savanes boisées                  | Open forest,<br>wooded savannah                               | 1.5          | WALKING   |
| 14    | Savane arborée,<br>arbustive                        | Sparsely wooded<br>savannah                                   | 1.5          | WALKING   |
| 16    | Plantations                                         | Plantations                                                   | 3            | WALKING   |
| 17    | Fourrées                                            | Thickets                                                      | 3            | WALKING   |
| 21    | Cultures et<br>Jachères                             | Cultivated and<br>fallow lands                                | 3            | WALKING   |
| 22    | Cultures sans<br>arbres                             | Cultivated lands<br>without trees                             | 3            | WALKING   |
| 32    | Savanes herbeuses                                   | Grassy savannah                                               | 3            | WALKING   |
| 41    | Agglomérations et<br>infra, plantations<br>urbaines | Agglomerations<br>and<br>infrastructure,<br>urban plantations | 3            | WALKING   |
| 61    | Sols nus, roches,<br>carrières, plage               | Open soil, rocky<br>terrain, quarries,<br>beach               | 3            | WALKING   |
| 1000  | Pistes rurales                                      | Rural tracks                                                  | 15           | MOTORIZED |
| 1002  | Routes bitumées<br>rurales                          | Primary rural<br>asphalted roads                              | 80           | MOTORIZED |
| 1003  | Routes secondaires<br>rurales                       | Secondary rural<br>roads                                      | 40           | MOTORIZED |
| 1004  | Pistes urbaines                                     | Urban tracks                                                  | 10           | MOTORIZED |
| 1005  | Routes bitumées<br>urbaines                         | Primary urban<br>asphalted roads                              | 30           | MOTORIZED |
| 1006  | Routes secondaires<br>urbaines                      | Secondary urban<br>roads                                      | 20           | MOTORIZED |

## Motorcycle-taxi scenario

| class | label                              | Label (English)                 | Speed (km/h) | mode      |
|-------|------------------------------------|---------------------------------|--------------|-----------|
| 11    | Forets denses                      | Dense forest                    | 8            | MOTORIZED |
| 12    | Forets riveraines                  | Riparian forest                 | 8            | MOTORIZED |
| 13    | Forets claires,<br>savanes boisées | Open forest,<br>wooded savannah | 8            | MOTORIZED |
| 14    | Savane arborée,<br>arbustive       | Sparsely wooded<br>savannah     | 8            | MOTORIZED |
| 16    | Plantations                        | Plantations                     | 10           | MOTORIZED |
| 17    | Fourrées                           | Thickets                        | 8            | MOTORIZED |

|      |                                               |                                                      |    |           |
|------|-----------------------------------------------|------------------------------------------------------|----|-----------|
| 21   | Cultures et Jachères                          | Cultivated and fallow lands                          | 10 | MOTORIZED |
| 22   | Cultures sans arbres                          | Cultivated lands without trees                       | 10 | MOTORIZED |
| 32   | Savanes herbeuses                             | Grassy savannah                                      | 12 | MOTORIZED |
| 41   | Agglomérations et infra, plantations urbaines | Agglomerations and infrastructure, urban plantations | 7  | MOTORIZED |
| 61   | Sols nus, roches, carrières, plage            | Open soil, rocky terrain, quarries, beach            | 7  | MOTORIZED |
| 1000 | Pistes                                        | Rural tracks                                         | 15 | MOTORIZED |
| 1002 | Routes bitumées                               | Primary rural asphalted roads                        | 40 | MOTORIZED |
| 1003 | Routes secondaires                            | Secondary rural roads                                | 20 | MOTORIZED |
| 1004 | Pistes urbaines                               | Urban tracks                                         | 10 | MOTORIZED |
| 1005 | Routes bitumées urbaines                      | Primary urban asphalted roads                        | 30 | MOTORIZED |
| 1006 | Routes secondaires urbaines                   | Secondary urban roads                                | 15 | MOTORIZED |

### Walking scenario

| class | label                                         | Label (English)                                      | Speed (km/h) | mode    |
|-------|-----------------------------------------------|------------------------------------------------------|--------------|---------|
| 11    | Forets denses                                 | Dense forest                                         | 1.5          | WALKING |
| 12    | Forets riveraines                             | Riparian forest                                      | 1.5          | WALKING |
| 13    | Forets claires, savanes boisées               | Open forest, wooded savannah                         | 1.5          | WALKING |
| 14    | Savane arborée, arbustive                     | Sparsely wooded savannah                             | 1.5          | WALKING |
| 16    | Plantations                                   | Plantations                                          | 3            | WALKING |
| 17    | Fourrées                                      | Thickets                                             | 3            | WALKING |
| 21    | Cultures et Jachères                          | Cultivated and fallow lands                          | 3            | WALKING |
| 22    | Cultures sans arbres                          | Cultivated lands without trees                       | 3            | WALKING |
| 32    | Savanes herbeuses                             | Grassy savannah                                      | 3            | WALKING |
| 41    | Agglomérations et infra, plantations urbaines | Agglomerations and infrastructure, urban plantations | 3            | WALKING |
| 61    | Sols nus, roches, carrières, plage            | Open soil, rocky terrain, quarries, beache           | 3            | WALKING |
| 1000  | Pistes                                        | Rural tracks                                         | 4            | WALKING |
| 1002  | Routes bitumées                               | Primary rural asphalted roads                        | 4            | WALKING |

|      |                             |                               |   |         |
|------|-----------------------------|-------------------------------|---|---------|
| 1003 | Routes secondaires          | Secondary rural roads         | 4 | WALKING |
| 1004 | Pistes urbaines             | Urban tracks                  | 4 | WALKING |
| 1005 | Routes bitumées urbaines    | Primary urban asphalted roads | 4 | WALKING |
| 1006 | Routes secondaires urbaines | Secondary urban roads         | 4 | WALKING |

For peer review only

## Supplement 2: Preparation of input geospatial data

All following geospatial data sets were prepared using QGIS ver. 3.2.0. After finalization, each of them was changed to raster format (if needed) at 100m resolution, and projected in the WGS84 Universal Transverse Mercator (zone 31N) coordinate reference system.

### Road network (vector)

We used the road network created by the *Direction de la Cartographie nationale et du cadastre* of Togo. In 2015, GIS experts from the national Togolese Institute for Statistics, Economic and Demographic studies (INSEED), in collaboration with technicians from the National Ministry of Public Works and Transportation, re-categorized this road data set into three hierarchical categories: asphalted roads, secondary roads, and tracks (see figure 1B).

### Barriers to movement (vector)

Water bodies were considered as barriers to terrestrial movements, unless a road segment crosses over, which is assumed to be a bridge. Rivers were recoded into two categories by the INSEED GIS experts, distinguishing permanent and seasonal rivers. We used both categories as barriers to movement in our accessibility models, reflecting our conservative approach of considering a maximum of potential barriers.

### Land cover (raster)

The land cover data set at 100m resolution was provided by INSEED. We assumed that different land cover categories can influence travel speed (e.g., travel is slower in a dense forest than in an open area), each of these land cover categories can be given a distinct travel speed in the travel scenario. The landcover category representing bodies of water was extracted from the landcover and used as an additional barrier to movement. Using the "Merge land cover" tool in AccessMod, the land cover raster was merged with the road network and the various barriers to movement, in order to obtain the final "merged land cover" on which travel models are applied. For the merging process, roads were stacked above the barriers, so that any existing road passing over a barrier was considered passable.

### Population density (raster)

Population densities were derived from the Worldpop data set[1]. This data set is at 3-arc second resolution (90m at the equator) and is appropriate for our analyses as the modelling technique to obtain it uses a detailed settlement mapping and links these settlements with gazetteer population numbers, considering that the vast majority of people live within a settlement. The remaining unaccounted-for population is then distributed using a weighted landcover grid in function of the probability of being populated, and the total population estimates are adjusted to UN estimates[2]. We used the UN-adjusted 2013 and 2018 Worldpop data sets for Togo. The data set was aggregated to 100m resolution.

A final correction step consisted in correcting for the population falling in pixels that were assigned a barrier status in the merged landcover data set, because this population is not considered by the accessibility analysis and is left unaccounted for. To correct for that, we extracted the population in each barrier pixel and dispatched it uniformly within the surface of the prefecture area the pixel belongs to. This way the population in each prefecture was correctly represented, even if a large number of barrier pixels are found. This step was done in AccessMod using the « Adjust population distribution» module.

**Supplement 3: Table of percentage of population living within 2-hour travel time to the nearest EmONC facility, per prefecture, with uncertainty intervals within brackets, and for the walking & motorized and the motorcycle-taxi scenarios**

| Prefectures  | Walking & Motorized Scenario |                    | Motorized only Scenario |                    | Walking only Scenario |                    |
|--------------|------------------------------|--------------------|-------------------------|--------------------|-----------------------|--------------------|
|              | 1-hour                       | 2-hour             | 1-hour                  | 2-hour             | 1-hour                | 2-hour             |
| Agoenyive    | 100 [99.6 - 100]             | 100 [100 - 100]    | 100 [100 - 100]         | 100 [100 - 100]    | 68.4 [53.2 - 80.3]    | 99.6 [95.5 - 99.9] |
| Agou         | 73.4 [59.9 - 83.5]           | 99.7 [96.3 - 99.9] | 69.3 [57.8 - 78.7]      | 99.9 [94.4 - 100]  | 13.0 [9.9 - 15.9]     | 27.9 [21.9 - 34.1] |
| Akebou       | 46.7 [31.7 - 61.5]           | 93.4 [84.3 - 96.3] | 42.9 [23.7 - 55.9]      | 92.3 [75.3 - 100]  | 0.9 [0.6 - 1.4]       | 4.8 [2.7 - 6.9]    |
| Amou         | 67.3 [55.3 - 76.3]           | 92.2 [86.5 - 95.4] | 74.4 [64.9 - 83.5]      | 99.3 [94.4 - 100]  | 8.8 [6 - 12.2]        | 26.9 [19.6 - 34.4] |
| Anie         | 41.5 [35.5 - 48.0]           | 74.0 [61.2 - 88.3] | 41.6 [37.2 - 44.7]      | 61.6 [52.3 - 71.3] | 15.4 [11.8 - 18.6]    | 27.8 [23.9 - 31.5] |
| Assoli       | 56.5 [41.2 - 67.3]           | 90.5 [82.2 - 94.7] | 77.7 [65.1 - 85.3]      | 99.6 [95.5 - 100]  | 9.8 [6.6 - 13.2]      | 25.5 [19.8 - 31.2] |
| Ave          | 76.3 [66.8 - 82.5]           | 94.8 [89.9 - 97.3] | 85.2 [75.6 - 93.3]      | 100 [99.9 - 100]   | 17.5 [12.8 - 21.6]    | 37.8 [29.4 - 45.4] |
| Bas-Mono     | 88.3 [82.2 - 92.0]           | 98.6 [96.4 - 99.4] | 98.9 [94.9 - 99.6]      | 99.6 [99.6 - 99.6] | 45.3 [33.9 - 54.2]    | 78.8 [68.0 - 86.3] |
| Bassar       | 57.5 [46.9 - 67.1]           | 87.2 [80.4 - 90.8] | 64.5 [54.2 - 71.7]      | 92.8 [84.4 - 97.0] | 12.5 [9.0 - 15.8]     | 24.3 [20.1 - 28.9] |
| Binah        | 85.9 [77.3 - 91.6]           | 97.9 [96.6 - 98.6] | 85.4 [77.7 - 90.5]      | 100 [97.3 - 100]   | 28 [20.6 - 36.6]      | 61.1 [53.2 - 66.8] |
| Blitta       | 81.4 [72.7 - 87.5]           | 97.1 [94.4 - 98.2] | 84.3 [78.8 - 89.8]      | 98.3 [95.0 - 99.9] | 31.7 [21.6 - 41.8]    | 64.1 [57.2 - 66.3] |
| Cinkasse     | 99.3 [93.5 - 99.6]           | 99.9 [99.9 - 99.9] | 94.5 [67.9 - 100]       | 100 [100 - 100]    | 10.7 [9.1 - 12.2]     | 18.1 [15.2 - 21.6] |
| Dankpen      | 48.3 [37.2 - 57.4]           | 83.3 [71.7 - 90.5] | 42.2 [32.7 - 52.0]      | 83.3 [69.1 - 93.4] | 9.8 [7.6 - 11.5]      | 16.8 [14.2 - 19.8] |
| Danyi        | 76.8 [64.9 - 85.9]           | 98.1 [94.8 - 99.2] | 92.5 [81.1 - 97.2]      | 100 [100 - 100]    | 8.8 [6.6 - 11.3]      | 23.5 [16.9 - 32.0] |
| Doufelgou    | 53.3 [44.3 - 61.8]           | 88.0 [77.7 - 93.0] | 62.4 [51.1 - 71.3]      | 95.6 [84.4 - 99.8] | 12.2 [8.6 - 15.3]     | 28.6 [21.8 - 35.4] |
| Est-Mono     | 37.3 [26.9 - 45.4]           | 75.0 [62.8 - 86.6] | 38.9 [28.0 - 46.8]      | 78.5 [61.6 - 94.1] | 5.1 [3.7 - 6.3]       | 12.2 [8.9 - 16.2]  |
| Golfe        | 100 [99.5 - 100]             | 100 [100 - 100]    | 100 [100 - 100]         | 100 [100 - 100]    | 67.1 [52.5 - 80]      | 99.9 [97.1 - 100]  |
| Haho         | 50.0 [38.0 - 61.4]           | 89.7 [78.8 - 94.9] | 49.7 [41.0 - 58.4]      | 85.1 [74.0 - 94.0] | 11.4 [8.8 - 13.3]     | 20.4 [16.9 - 24.3] |
| Keran        | 42.0 [29.5 - 54.9]           | 87.8 [74.9 - 93.3] | 34.4 [26.3 - 42.7]      | 86.0 [64.7 - 97.7] | 4.3 [3.0 - 5.7]       | 12.6 [9.3 - 15.3]  |
| Kloto        | 85.5 [76.7 - 91.9]           | 99.4 [98.0 - 99.7] | 97.2 [90.5 - 99.8]      | 100 [100 - 100]    | 22.7 [18.3 - 27]      | 40.7 [34.7 - 45.6] |
| Kozah        | 85.2 [76.6 - 90.3]           | 97.1 [95.1 - 98.1] | 92.9 [87.6 - 95.9]      | 100 [99.8 - 100]   | 22.1 [17.6 - 26.3]    | 42.3 [33.8 - 50.8] |
| Kpele        | 71.8 [62.3 - 80.1]           | 98.2 [91.3 - 99.7] | 78.4 [71.8 - 84.3]      | 99.6 [94.2 - 100]  | 16.8 [12.2 - 20.2]    | 29.6 [25.3 - 34.3] |
| Kpendjal     | 64.2 [47.9 - 76.5]           | 98.7 [92.9 - 99.8] | 59.7 [38.6 - 74.8]      | 99.5 [92.8 - 100]  | 3.7 [2.7 - 4.7]       | 10.3 [7.0 - 13.6]  |
| Lacs         | 94.9 [91.1 - 97.1]           | 99.7 [99.0 - 100]  | 95.4 [91.5 - 97.8]      | 100 [99.9 - 100]   | 22.2 [15.9 - 28.8]    | 51.8 [40.1 - 64.2] |
| Lomé Commune | 100 [100 - 100]              | 100 [100 - 100]    | 100 [100 - 100]         | 100 [100 - 100]    | 100 [93.9 - 100]      | 100 [100 - 100]    |
| Moyen-Mono   | 39.6 [25.9 - 50.9]           | 94.0 [79.8 - 98.2] | 42.6 [34.4 - 50.6]      | 90.7 [66.3 - 99.3] | 3.4 [2.2 - 4.5]       | 12.6 [7.8 - 19.2]  |
| Naki-Ouest   | 77.5 [60.5 - 89.8]           | 99.7 [98.5 - 100]  | 64.3 [49.3 - 77.9]      | 100 [97.8 - 100]   | 11.4 [8 - 15.2]       | 26.3 [21.6 - 30.8] |
| Ogou         | 54.9 [44.2 - 66.3]           | 95.9 [85.7 - 99.2] | 54.9 [46.7 - 62.9]      | 93.2 [79.1 - 99.9] | 10.1 [7.4 - 13]       | 26.0 [19.5 - 30.9] |
| Oti          | 79.3 [68.4 - 86.2]           | 97.7 [93.5 - 98.8] | 78.4 [67.6 - 86.4]      | 98.0 [96.1 - 99.4] | 20.6 [15.5 - 24.7]    | 37.1 [30.7 - 44.7] |
| Oti-Sud      | 47.8 [33.5 - 58.5]           | 95.3 [83.1 - 98.6] | 36.7 [23.6 - 49.8]      | 87.4 [69.7 - 99.4] | 5.5 [3.7 - 6.7]       | 11.5 [8.9 - 13.6]  |
| Plaine de Mo | 33.8 [21.1 - 45.9]           | 72.8 [62.8 - 78.8] | 37.3 [24.0 - 52.7]      | 87.3 [75.7 - 94.1] | 1.7 [1.1 - 2.5]       | 7.3 [4.5 - 11.2]   |
| Sotouboua    | 42.4 [31.5 - 52.7]           | 75.2 [67.8 - 77.9] | 49.9 [40.1 - 57.8]      | 82.2 [70.4 - 89.6] | 3.9 [2.9 - 4.9]       | 9.0 [6.9 - 11.6]   |
| Tandjoare    | 85.6 [76.7 - 91.2]           | 99.8 [98.3 - 100]  | 76.2 [65.5 - 84.7]      | 98.6 [92.9 - 100]  | 8.8 [6.3 - 11.7]      | 27.5 [18.9 - 37.0] |
| Tchamba      | 54.9 [37.3 - 67.9]           | 90.2 [83.7 - 93.4] | 45.9 [33.4 - 60.9]      | 96.5 [88.8 - 99.2] | 8.2 [6.4 - 9.9]       | 15.7 [12.9 - 18.3] |
| Tchaoudjo    | 65.0 [53.3 - 74.8]           | 93.4 [88.0 - 95.7] | 71.8 [57.6 - 80.1]      | 98.5 [92.4 - 99.5] | 16.7 [11.7 - 21.2]    | 30.4 [26.5 - 34.8] |
| Tone         | 91.8 [80.5 - 97.4]           | 100 [99.9 - 100]   | 82.4 [71.9 - 89.2]      | 99.9 [98.5 - 100]  | 13.9 [10.1 - 17.3]    | 28.1 [22.7 - 34.6] |

|                |                           |                           |                           |                           |                           |                           |
|----------------|---------------------------|---------------------------|---------------------------|---------------------------|---------------------------|---------------------------|
| Vo             | 85.6 [70.3 - 93.2]        | 99.4 [98.3 - 99.8]        | 95.5 [83.9 - 99.5]        | 100 [100 - 100]           | 10.9 [7.0 - 15.4]         | 31.6 [23.3 - 43.4]        |
| Wawa           | 51.6 [36.0 - 65.0]        | 93.0 [83.2 - 96.8]        | 67.7 [45.3 - 82.3]        | 100 [97.5 - 100]          | 2.7 [2.1 - 3.4]           | 6.5 [4.8 - 8.6]           |
| Yoto           | 82.2 [71.7 - 88.2]        | 95.9 [93.3 - 97.5]        | 87.0 [78.9 - 92]          | 98.9 [97.2 - 99.6]        | 24.3 [18.0 - 29.0]        | 46.1 [37.8 - 55.4]        |
| Zio            | 87.9 [77.4 - 93.9]        | 99.7 [98.5 - 99.9]        | 93.1 [85.3 - 96.4]        | 100 [99.5 - 100]          | 16.4 [11.9 - 21.2]        | 39.5 [29.4 - 49.7]        |
| <b>Country</b> | <b>78.3 [70.5 - 84.0]</b> | <b>95.5 [91.6 - 97.5]</b> | <b>79.2 [72.2 - 84.3]</b> | <b>96.0 [91.6 - 98.4]</b> | <b>33.4 [27.1 - 38.4]</b> | <b>50.8 [46.0 - 55.0]</b> |

For peer review only



## Supplement 4: Effects of considering slopes to correct for walking speeds

When walking is used in a travel scenario, AccessMod computes the slope between adjacent raster cells using the Digital Elevation Model. Walking speeds are then corrected using the slope value, following the Tobler (1993) formula[3]:

$$V = V_F * e^{-3.5*|S+0.05|},$$

where  $V$  is the corrected walking speed in kilometers per hour (Km/h),  $V_F$  is the walking speed on a flat surface (given by the user-defined travel scenario), and  $S$  is the slope in hundredth of percent.

These corrections applied when walking off-road in the "Walking & Motorized scenario", and everywhere in the "Walking scenario". In the table below, each cell is composed of two results. The first figure takes slope correction into consideration, while the second figure does not take into account the slope correction.

|                         | Walking & Motorized Scenario |               |               |               | Walking Scenario |               |               |               |
|-------------------------|------------------------------|---------------|---------------|---------------|------------------|---------------|---------------|---------------|
|                         | 2013                         |               | 2018          |               | 2013             |               | 2018          |               |
| <i>Regions</i>          | <i>1-hour</i>                | <i>2-hour</i> | <i>1-hour</i> | <i>2-hour</i> | <i>1-hour</i>    | <i>2-hour</i> | <i>1-hour</i> | <i>2-hour</i> |
| <b>Plateaux</b>         | 66.2/67.7                    | 95.1/95.6     | 55.4/56.6     | 89.8/90.3     | 15.5/16.2        | 30.2/31.4     | 10.9/11.4     | 22.6/23.5     |
| <b>Kara</b>             | 63.3/64.3                    | 90.4/90.9     | 62.7/63.6     | 90.2/90.7     | 14.5/15.0        | 29.7/30.2     | 14.5/14.9     | 29.3/29.8     |
| <b>Maritime</b>         | 94.7/94.8                    | 99.5/99.5     | 94.4/94.5     | 99.4/99.4     | 47.9/48.2        | 74.8/75.1     | 47.7/48.0     | 76.4/76.5     |
| <b>Centrale</b>         | 70.2/70.6                    | 92.3/92.6     | 65.2/65.6     | 91.7/91.9     | 22.0/22.3        | 41.3/41.5     | 18.1/18.5     | 35.7/35.9     |
| <b>Savanes</b>          | 81.7/81.9                    | 98.9/99.0     | 80.7/80.9     | 98.9/99.0     | 12.1/12.4        | 26.5/27.2     | 11.4/11.6     | 24.2/24.9     |
| <b>Lomé<br/>Commune</b> | 100/100                      | 100/100       | 100/100       | 100/100       | 100/100          | 100/100       | 100/100       | 100/100       |
| <b>Country</b>          | 81.0/81.5                    | 96.7/98.0     | 78.3/78.8     | 95.5/95.7     | 34.7/35.1        | 52.3/52.8     | 33.4/33.7     | 50.8/51.2     |

## Supplementary References

1. Worldpop, CIESIN. The spatial distribution of population with country total adjusted to match the corresponding UNPD estimate - Togo [Internet]. 2013 [accessed 08.10.2020]. Available from:  
[ftp://ftp.worldpop.org.uk/GIS/Population/Global\\_2000\\_2020/2019/TGO/tgo\\_ppp\\_2019\\_U\\_Nadj.tif](ftp://ftp.worldpop.org.uk/GIS/Population/Global_2000_2020/2019/TGO/tgo_ppp_2019_U_Nadj.tif).
2. Linard C, Gilbert M, Snow RW, et al. Population Distribution, Settlement Patterns and Accessibility across Africa in 2010. *PLoS One*. 2012;7(2):8. doi: 10.1371/journal.pone.0031743
3. Tobler W. Three Presentations on Geographical Analysis and Modeling: Non-Isotropic Geographic Modeling; Speculations on the Geometry of Geography; and Global Spatial Analysis. UC Santa Barbara: National Center for Geographic Information and Analysis. ; 1993. [accessed 08.10.2020] <https://escholarship.org/uc/item/05r820mz>
