# Supplementary material for: National optimisation of accessibility to emergency obstetrical and neonatal care in Togo: a geospatial analysis
Source: PubMed Central journal article supplement — BMJ Open. 2021 Jul 30;11(7):e045891. doi: 10.1136/bmjopen-2020-045891 (PMC8327815; doi:10.1136/bmjopen-2020-045891), 2021-07-30
Supplement: bmjopen-2020-045891supp001.pdf [file bmjopen-2020-045891supp001.pdf]

## SUPPLEMENTARY MATERIAL

## Supplement 1: travel scenario tables

## Walking &amp; Motorized scenario

| Class | Label                                         | Label (English)                                      | Speed (km/h) | Mode      |
|-------|-----------------------------------------------|------------------------------------------------------|--------------|-----------|
| 11    | Forets denses                                 | Dense forest                                         | 1.5          | WALKING   |
| 12    | Forets riveraines                             | Riparian forest                                      | 1.5          | WALKING   |
| 13    | Forets claires, savanes boisées               | Open forest, wooded savannah                         | 1.5          | WALKING   |
| 14    | Savane arborée, arbustive                     | Sparsely wooded savannah                             | 1.5          | WALKING   |
| 16    | Plantations                                   | Plantations                                          | 3            | WALKING   |
| 17    | Fourrées                                      | Thickets                                             | 3            | WALKING   |
| 21    | Cultures et Jachères                          | Cultivated and fallow lands                          | 3            | WALKING   |
| 22    | Cultures sans arbres                          | Cultivated lands without trees                       | 3            | WALKING   |
| 32    | Savanes herbeuses                             | Grassy savannah                                      | 3            | WALKING   |
| 41    | Agglomérations et infra, plantations urbaines | Agglomerations and infrastructure, urban plantations | 3            | WALKING   |
| 61    | Sols nus, roches, carrières, plage            | Open soil, rocky terrain, quarries, beach            | 3            | WALKING   |
| 1000  | Pistes rurales                                | Rural tracks                                         | 15           | MOTORIZED |
| 1002  | Routes bitumées rurales                       | Primary rural asphalted roads                        | 80           | MOTORIZED |
| 1003  | Routes secondaires rurales                    | Secondary rural roads                                | 40           | MOTORIZED |
| 1004  | Pistes urbaines                               | Urban tracks                                         | 10           | MOTORIZED |
| 1005  | Routes bitumées urbaines                      | Primary urban asphalted roads                        | 30           | MOTORIZED |
| 1006  | Routes secondaires urbaines                   | Secondary urban roads                                | 20           | MOTORIZED |

## Motorcycle-taxi scenario

| class | label                           | Label (English)              | Speed (km/h) | mode      |
|-------|---------------------------------|------------------------------|--------------|-----------|
| 11    | Forets denses                   | Dense forest                 | 8            | MOTORIZED |
| 12    | Forets riveraines               | Riparian forest              | 8            | MOTORIZED |
| 13    | Forets claires, savanes boisées | Open forest, wooded savannah | 8            | MOTORIZED |
| 14    | Savane arborée, arbustive       | Sparsely wooded savannah     | 8            | MOTORIZED |
| 16    | Plantations                     | Plantations                  | 10           | MOTORIZED |
| 17    | Fourrées                        | Thickets                     | 8            | MOTORIZED |

|      |                                               |                                                      |    |           |
|------|-----------------------------------------------|------------------------------------------------------|----|-----------|
| 21   | Cultures et Jachères                          | Cultivated and fallow lands                          | 10 | MOTORIZED |
| 22   | Cultures sans arbres                          | Cultivated lands without trees                       | 10 | MOTORIZED |
| 32   | Savanes herbeuses                             | Grassy savannah                                      | 12 | MOTORIZED |
| 41   | Agglomérations et infra, plantations urbaines | Agglomerations and infrastructure, urban plantations | 7  | MOTORIZED |
| 61   | Sols nus, roches, carrières, plage            | Open soil, rocky terrain, quarries, beach            | 7  | MOTORIZED |
| 1000 | Pistes                                        | Rural tracks                                         | 15 | MOTORIZED |
| 1002 | Routes bitumées                               | Primary rural asphalted roads                        | 40 | MOTORIZED |
| 1003 | Routes secondaires                            | Secondary rural roads                                | 20 | MOTORIZED |
| 1004 | Pistes urbaines                               | Urban tracks                                         | 10 | MOTORIZED |
| 1005 | Routes bitumées urbaines                      | Primary urban asphalted roads                        | 30 | MOTORIZED |
| 1006 | Routes secondaires urbaines                   | Secondary urban roads                                | 15 | MOTORIZED |

### Walking scenario

| class | label                                         | Label (English)                                      | Speed (km/h) | mode    |
|-------|-----------------------------------------------|------------------------------------------------------|--------------|---------|
| 11    | Forets denses                                 | Dense forest                                         | 1.5          | WALKING |
| 12    | Forets riveraines                             | Riparian forest                                      | 1.5          | WALKING |
| 13    | Forets claires, savanes boisées               | Open forest, wooded savannah                         | 1.5          | WALKING |
| 14    | Savane arborée, arbustive                     | Sparsely wooded savannah                             | 1.5          | WALKING |
| 16    | Plantations                                   | Plantations                                          | 3            | WALKING |
| 17    | Fourrées                                      | Thickets                                             | 3            | WALKING |
| 21    | Cultures et Jachères                          | Cultivated and fallow lands                          | 3            | WALKING |
| 22    | Cultures sans arbres                          | Cultivated lands without trees                       | 3            | WALKING |
| 32    | Savanes herbeuses                             | Grassy savannah                                      | 3            | WALKING |
| 41    | Agglomérations et infra, plantations urbaines | Agglomerations and infrastructure, urban plantations | 3            | WALKING |
| 61    | Sols nus, roches, carrières, plage            | Open soil, rocky terrain, quarries, beache           | 3            | WALKING |
| 1000  | Pistes                                        | Rural tracks                                         | 4            | WALKING |
| 1002  | Routes bitumées                               | Primary rural asphalted roads                        | 4            | WALKING |

|      |                             |                               |   |         |
|------|-----------------------------|-------------------------------|---|---------|
| 1003 | Routes secondaires          | Secondary rural roads         | 4 | WALKING |
| 1004 | Pistes urbaines             | Urban tracks                  | 4 | WALKING |
| 1005 | Routes bitumées urbaines    | Primary urban asphalted roads | 4 | WALKING |
| 1006 | Routes secondaires urbaines | Secondary urban roads         | 4 | WALKING |

## Supplement 2: Preparation of input geospatial data

All following geospatial data sets were prepared using QGIS ver. 3.2.0. After finalization, each of them was changed to raster format (if needed) at 100m resolution, and projected in the WGS84 Universal Transverse Mercator (zone 31N) coordinate reference system.

### Road network (vector)

We used the road network created by the *Direction de la Cartographie nationale et du cadastre* of Togo. In 2015, GIS experts from the national Togolese Institute for Statistics, Economic and Demographic studies (INSEED), in collaboration with technicians from the National Ministry of Public Works and Transportation, re-categorized this road data set into three hierarchical categories: asphalted roads, secondary roads, and tracks (see figure 1B).

### Barriers to movement (vector)

Water bodies were considered as barriers to terrestrial movements, unless a road segment crosses over, which is assumed to be a bridge. Rivers were recoded into two categories by the INSEED GIS experts, distinguishing permanent and seasonal rivers. We used both categories as barriers to movement in our accessibility models, reflecting our conservative approach of considering a maximum of potential barriers.

### Land cover (raster)

The land cover data set at 100m resolution was provided by INSEED. We assumed that different land cover categories can influence travel speed (e.g., travel is slower in a dense forest than in an open area), each of these land cover categories can be given a distinct travel speed in the travel scenario. The landcover category representing bodies of water was extracted from the landcover and used as an additional barrier to movement. Using the "Merge land cover" tool in AccessMod, the land cover raster was merged with the road network and the various barriers to movement, in order to obtain the final "merged land cover" on which travel models are applied. For the merging process, roads were stacked above the barriers, so that any existing road passing over a barrier was considered passable.

### Population density (raster)

Population densities were derived from the Worldpop data set[1]. This data set is at 3-arc second resolution (90m at the equator) and is appropriate for our analyses as the modelling technique to obtain it uses a detailed settlement mapping and links these settlements with gazetteer population numbers, considering that the vast majority of people live within a settlement. The remaining unaccounted-for population is then distributed using a weighted landcover grid in function of the probability of being populated, and the total population estimates are adjusted to UN estimates[2]. We used the UN-adjusted 2013 and 2018 Worldpop data sets for Togo. The data set was aggregated to 100m resolution.

A final correction step consisted in correcting for the population falling in pixels that were assigned a barrier status in the merged landcover data set, because this population is not considered by the accessibility analysis and is left unaccounted for. To correct for that, we extracted the population in each barrier pixel and dispatched it uniformly within the surface of the prefecture area the pixel belongs to. This way the population in each prefecture was correctly represented, even if a large number of barrier pixels are found. This step was done in AccessMod using the « Adjust population distribution» module.

**Supplement 3: Table of percentage of population living within 2-hour travel time to the nearest EmONC facility, per prefecture, with uncertainty intervals within brackets, and for the walking & motorized and the motorcycle-taxi scenarios**

| Prefectures  | Walking & Motorized Scenario |                    | Motorized only Scenario |                    | Walking only Scenario |                    |
|--------------|------------------------------|--------------------|-------------------------|--------------------|-----------------------|--------------------|
|              | 1-hour                       | 2-hour             | 1-hour                  | 2-hour             | 1-hour                | 2-hour             |
| Agoenyive    | 100 [99.6 - 100]             | 100 [100 - 100]    | 100 [100 - 100]         | 100 [100 - 100]    | 68.4 [53.2 - 80.3]    | 99.6 [95.5 - 99.9] |
| Agou         | 73.4 [59.9 - 83.5]           | 99.7 [96.3 - 99.9] | 69.3 [57.8 - 78.7]      | 99.9 [94.4 - 100]  | 13.0 [9.9 - 15.9]     | 27.9 [21.9 - 34.1] |
| Akebou       | 46.7 [31.7 - 61.5]           | 93.4 [84.3 - 96.3] | 42.9 [23.7 - 55.9]      | 92.3 [75.3 - 100]  | 0.9 [0.6 - 1.4]       | 4.8 [2.7 - 6.9]    |
| Amou         | 67.3 [55.3 - 76.3]           | 92.2 [86.5 - 95.4] | 74.4 [64.9 - 83.5]      | 99.3 [94.4 - 100]  | 8.8 [6 - 12.2]        | 26.9 [19.6 - 34.4] |
| Anie         | 41.5 [35.5 - 48.0]           | 74.0 [61.2 - 88.3] | 41.6 [37.2 - 44.7]      | 61.6 [52.3 - 71.3] | 15.4 [11.8 - 18.6]    | 27.8 [23.9 - 31.5] |
| Assoli       | 56.5 [41.2 - 67.3]           | 90.5 [82.2 - 94.7] | 77.7 [65.1 - 85.3]      | 99.6 [95.5 - 100]  | 9.8 [6.6 - 13.2]      | 25.5 [19.8 - 31.2] |
| Ave          | 76.3 [66.8 - 82.5]           | 94.8 [89.9 - 97.3] | 85.2 [75.6 - 93.3]      | 100 [99.9 - 100]   | 17.5 [12.8 - 21.6]    | 37.8 [29.4 - 45.4] |
| Bas-Mono     | 88.3 [82.2 - 92.0]           | 98.6 [96.4 - 99.4] | 98.9 [94.9 - 99.6]      | 99.6 [99.6 - 99.6] | 45.3 [33.9 - 54.2]    | 78.8 [68.0 - 86.3] |
| Bassar       | 57.5 [46.9 - 67.1]           | 87.2 [80.4 - 90.8] | 64.5 [54.2 - 71.7]      | 92.8 [84.4 - 97.0] | 12.5 [9.0 - 15.8]     | 24.3 [20.1 - 28.9] |
| Binah        | 85.9 [77.3 - 91.6]           | 97.9 [96.6 - 98.6] | 85.4 [77.7 - 90.5]      | 100 [97.3 - 100]   | 28 [20.6 - 36.6]      | 61.1 [53.2 - 66.8] |
| Blitta       | 81.4 [72.7 - 87.5]           | 97.1 [94.4 - 98.2] | 84.3 [78.8 - 89.8]      | 98.3 [95.0 - 99.9] | 31.7 [21.6 - 41.8]    | 64.1 [57.2 - 66.3] |
| Cinkasse     | 99.3 [93.5 - 99.6]           | 99.9 [99.9 - 99.9] | 94.5 [67.9 - 100]       | 100 [100 - 100]    | 10.7 [9.1 - 12.2]     | 18.1 [15.2 - 21.6] |
| Dankpen      | 48.3 [37.2 - 57.4]           | 83.3 [71.7 - 90.5] | 42.2 [32.7 - 52.0]      | 83.3 [69.1 - 93.4] | 9.8 [7.6 - 11.5]      | 16.8 [14.2 - 19.8] |
| Danyi        | 76.8 [64.9 - 85.9]           | 98.1 [94.8 - 99.2] | 92.5 [81.1 - 97.2]      | 100 [100 - 100]    | 8.8 [6.6 - 11.3]      | 23.5 [16.9 - 32.0] |
| Doufelgou    | 53.3 [44.3 - 61.8]           | 88.0 [77.7 - 93.0] | 62.4 [51.1 - 71.3]      | 95.6 [84.4 - 99.8] | 12.2 [8.6 - 15.3]     | 28.6 [21.8 - 35.4] |
| Est-Mono     | 37.3 [26.9 - 45.4]           | 75.0 [62.8 - 86.6] | 38.9 [28.0 - 46.8]      | 78.5 [61.6 - 94.1] | 5.1 [3.7 - 6.3]       | 12.2 [8.9 - 16.2]  |
| Golfe        | 100 [99.5 - 100]             | 100 [100 - 100]    | 100 [100 - 100]         | 100 [100 - 100]    | 67.1 [52.5 - 80]      | 99.9 [97.1 - 100]  |
| Haho         | 50.0 [38.0 - 61.4]           | 89.7 [78.8 - 94.9] | 49.7 [41.0 - 58.4]      | 85.1 [74.0 - 94.0] | 11.4 [8.8 - 13.3]     | 20.4 [16.9 - 24.3] |
| Keran        | 42.0 [29.5 - 54.9]           | 87.8 [74.9 - 93.3] | 34.4 [26.3 - 42.7]      | 86.0 [64.7 - 97.7] | 4.3 [3.0 - 5.7]       | 12.6 [9.3 - 15.3]  |
| Kloto        | 85.5 [76.7 - 91.9]           | 99.4 [98.0 - 99.7] | 97.2 [90.5 - 99.8]      | 100 [100 - 100]    | 22.7 [18.3 - 27]      | 40.7 [34.7 - 45.6] |
| Kozah        | 85.2 [76.6 - 90.3]           | 97.1 [95.1 - 98.1] | 92.9 [87.6 - 95.9]      | 100 [99.8 - 100]   | 22.1 [17.6 - 26.3]    | 42.3 [33.8 - 50.8] |
| Kpele        | 71.8 [62.3 - 80.1]           | 98.2 [91.3 - 99.7] | 78.4 [71.8 - 84.3]      | 99.6 [94.2 - 100]  | 16.8 [12.2 - 20.2]    | 29.6 [25.3 - 34.3] |
| Kpendjal     | 64.2 [47.9 - 76.5]           | 98.7 [92.9 - 99.8] | 59.7 [38.6 - 74.8]      | 99.5 [92.8 - 100]  | 3.7 [2.7 - 4.7]       | 10.3 [7.0 - 13.6]  |
| Lacs         | 94.9 [91.1 - 97.1]           | 99.7 [99.0 - 100]  | 95.4 [91.5 - 97.8]      | 100 [99.9 - 100]   | 22.2 [15.9 - 28.8]    | 51.8 [40.1 - 64.2] |
| Lomé Commune | 100 [100 - 100]              | 100 [100 - 100]    | 100 [100 - 100]         | 100 [100 - 100]    | 100 [93.9 - 100]      | 100 [100 - 100]    |
| Moyen-Mono   | 39.6 [25.9 - 50.9]           | 94.0 [79.8 - 98.2] | 42.6 [34.4 - 50.6]      | 90.7 [66.3 - 99.3] | 3.4 [2.2 - 4.5]       | 12.6 [7.8 - 19.2]  |
| Naki-Ouest   | 77.5 [60.5 - 89.8]           | 99.7 [98.5 - 100]  | 64.3 [49.3 - 77.9]      | 100 [97.8 - 100]   | 11.4 [8 - 15.2]       | 26.3 [21.6 - 30.8] |
| Ogou         | 54.9 [44.2 - 66.3]           | 95.9 [85.7 - 99.2] | 54.9 [46.7 - 62.9]      | 93.2 [79.1 - 99.9] | 10.1 [7.4 - 13]       | 26.0 [19.5 - 30.9] |
| Oti          | 79.3 [68.4 - 86.2]           | 97.7 [93.5 - 98.8] | 78.4 [67.6 - 86.4]      | 98.0 [96.1 - 99.4] | 20.6 [15.5 - 24.7]    | 37.1 [30.7 - 44.7] |
| Oti-Sud      | 47.8 [33.5 - 58.5]           | 95.3 [83.1 - 98.6] | 36.7 [23.6 - 49.8]      | 87.4 [69.7 - 99.4] | 5.5 [3.7 - 6.7]       | 11.5 [8.9 - 13.6]  |
| Plaine de Mo | 33.8 [21.1 - 45.9]           | 72.8 [62.8 - 78.8] | 37.3 [24.0 - 52.7]      | 87.3 [75.7 - 94.1] | 1.7 [1.1 - 2.5]       | 7.3 [4.5 - 11.2]   |
| Sotouboua    | 42.4 [31.5 - 52.7]           | 75.2 [67.8 - 77.9] | 49.9 [40.1 - 57.8]      | 82.2 [70.4 - 89.6] | 3.9 [2.9 - 4.9]       | 9.0 [6.9 - 11.6]   |
| Tandjoare    | 85.6 [76.7 - 91.2]           | 99.8 [98.3 - 100]  | 76.2 [65.5 - 84.7]      | 98.6 [92.9 - 100]  | 8.8 [6.3 - 11.7]      | 27.5 [18.9 - 37.0] |
| Tchamba      | 54.9 [37.3 - 67.9]           | 90.2 [83.7 - 93.4] | 45.9 [33.4 - 60.9]      | 96.5 [88.8 - 99.2] | 8.2 [6.4 - 9.9]       | 15.7 [12.9 - 18.3] |
| Tchaoudjo    | 65.0 [53.3 - 74.8]           | 93.4 [88.0 - 95.7] | 71.8 [57.6 - 80.1]      | 98.5 [92.4 - 99.5] | 16.7 [11.7 - 21.2]    | 30.4 [26.5 - 34.8] |
| Tone         | 91.8 [80.5 - 97.4]           | 100 [99.9 - 100]   | 82.4 [71.9 - 89.2]      | 99.9 [98.5 - 100]  | 13.9 [10.1 - 17.3]    | 28.1 [22.7 - 34.6] |

|                |                    |                    |                    |                    |                    |                    |
|----------------|--------------------|--------------------|--------------------|--------------------|--------------------|--------------------|
| Vo             | 85.6 [70.3 - 93.2] | 99.4 [98.3 - 99.8] | 95.5 [83.9 - 99.5] | 100 [100 - 100]    | 10.9 [7.0 - 15.4]  | 31.6 [23.3 - 43.4] |
| Wawa           | 51.6 [36.0 - 65.0] | 93.0 [83.2 - 96.8] | 67.7 [45.3 - 82.3] | 100 [97.5 - 100]   | 2.7 [2.1 - 3.4]    | 6.5 [4.8 - 8.6]    |
| Yoto           | 82.2 [71.7 - 88.2] | 95.9 [93.3 - 97.5] | 87.0 [78.9 - 92]   | 98.9 [97.2 - 99.6] | 24.3 [18.0 - 29.0] | 46.1 [37.8 - 55.4] |
| Zio            | 87.9 [77.4 - 93.9] | 99.7 [98.5 - 99.9] | 93.1 [85.3 - 96.4] | 100 [99.5 - 100]   | 16.4 [11.9 - 21.2] | 39.5 [29.4 - 49.7] |
| <b>Country</b> | 78.3 [70.5 - 84.0] | 95.5 [91.6 - 97.5] | 79.2 [72.2 - 84.3] | 96.0 [91.6 - 98.4] | 33.4 [27.1 - 38.4] | 50.8 [46.0 - 55.0] |

#### Supplement 4: Effects of considering slopes to correct for walking speeds

When walking is used in a travel scenario, AccessMod computes the slope between adjacent raster cells using the Digital Elevation Model. Walking speeds are then corrected using the slope value, following the Tobler (1993) formula[3]:

$$V = V_F * e^{-3.5*|S+0.05|},$$

where  $V$  is the corrected walking speed in kilometers per hour (Km/h),  $V_F$  is the walking speed on a flat surface (given by the user-defined travel scenario), and  $S$  is the slope in hundredth of percent.

These corrections applied when walking off-road in the "Walking & Motorized scenario", and everywhere in the "Walking scenario". In the table below, each cell is composed of two results. The first figure takes slope correction into consideration, while the second figure does not take into account the slope correction.

| Regions      | Walking & Motorized Scenario |           |           |           | Walking Scenario |           |           |           |
|--------------|------------------------------|-----------|-----------|-----------|------------------|-----------|-----------|-----------|
|              | 2013                         |           | 2018      |           | 2013             |           | 2018      |           |
|              | 1-hour                       | 2-hour    | 1-hour    | 2-hour    | 1-hour           | 2-hour    | 1-hour    | 2-hour    |
| Plateaux     | 66.2/67.7                    | 95.1/95.6 | 55.4/56.6 | 89.8/90.3 | 15.5/16.2        | 30.2/31.4 | 10.9/11.4 | 22.6/23.5 |
| Kara         | 63.3/64.3                    | 90.4/90.9 | 62.7/63.6 | 90.2/90.7 | 14.5/15.0        | 29.7/30.2 | 14.5/14.9 | 29.3/29.8 |
| Maritime     | 94.7/94.8                    | 99.5/99.5 | 94.4/94.5 | 99.4/99.4 | 47.9/48.2        | 74.8/75.1 | 47.7/48.0 | 76.4/76.5 |
| Centrale     | 70.2/70.6                    | 92.3/92.6 | 65.2/65.6 | 91.7/91.9 | 22.0/22.3        | 41.3/41.5 | 18.1/18.5 | 35.7/35.9 |
| Savanes      | 81.7/81.9                    | 98.9/99.0 | 80.7/80.9 | 98.9/99.0 | 12.1/12.4        | 26.5/27.2 | 11.4/11.6 | 24.2/24.9 |
| Lomé Commune | 100/100                      | 100/100   | 100/100   | 100/100   | 100/100          | 100/100   | 100/100   | 100/100   |
| Country      | 81.0/81.5                    | 96.7/98.0 | 78.3/78.8 | 95.5/95.7 | 34.7/35.1        | 52.3/52.8 | 33.4/33.7 | 50.8/51.2 |

## Supplementary References

1. Worldpop, CIESIN. The spatial distribution of population with country total adjusted to match the corresponding UNPD estimate - Togo [Internet]. 2013 [accessed 08.10.2020]. Available from: [ftp://ftp.worldpop.org.uk/GIS/Population/Global\\_2000\\_2020/2019/TGO/tgo\\_ppp\\_2019\\_U\\_Nadj.tif](ftp://ftp.worldpop.org.uk/GIS/Population/Global_2000_2020/2019/TGO/tgo_ppp_2019_U_Nadj.tif).
2. Linard C, Gilbert M, Snow RW, et al. Population Distribution, Settlement Patterns and Accessibility across Africa in 2010. *PLoS One*. 2012;7(2):8. doi: 10.1371/journal.pone.0031743
3. Tobler W. Three Presentations on Geographical Analysis and Modeling: Non-Isotropic Geographic Modeling; Speculations on the Geometry of Geography; and Global Spatial Analysis. UC Santa Barbara: National Center for Geographic Information and Analysis. ; 1993. [accessed 08.10.2020] <https://escholarship.org/uc/item/05r820mz>
